# Supplementary material for: Determination of the H&lt;sub&gt;2&lt;/sub&gt;O content in minerals, especially zeolites, from their refractive indices based on mean electronic polarizabilities of cations
Source: Copernicus journal article supplement (doi:10.5194/ejm-32-27-2020), 2020-01-15
Supplement: Supplementary file 1 [file ejm-32-27-2020-supplement.zip]

Archive with 2 entries (2 files):
- Table S1 H2O compounds.xlsx
- ejm-32-27-2020-supplement-title-page.pdf
