# Supplementary material for: Determination of the H&lt;sub&gt;2&lt;/sub&gt;O content in minerals, especially zeolites, from their refractive indices based on mean electronic polarizabilities of cations
Source: Copernicus journal article supplement (doi:10.5194/ejm-32-27-2020), 2020-01-15
Supplement: Supplementary file 1 [file ejm-32-27-2020-supplement.zip › ejm-32-27-2020-supplement-title-page.pdf]

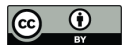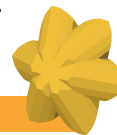

*Supplement of*

**Determination of the H<sub>2</sub>O content in minerals, especially zeolites, from their refractive indices based on mean electronic polarizabilities of cations**

**Reinhard X. Fischer et al.**

*Correspondence to:* Reinhard X. Fischer ([rfischer@uni-bremen.de](mailto:rfischer@uni-bremen.de))

- [ejm-32-27-2020-supplement-title-page.pdf](#)
- [Table S1 H2O compounds.xlsx](#)

The copyright of individual parts of the supplement might differ from the CC BY 4.0 License.
