# Supplementary material for: Determination of the H&lt;sub&gt;2&lt;/sub&gt;O content in minerals, especially zeolites, from their refractive indices based on mean electronic polarizabilities of cations
Source: Copernicus journal article supplement (doi:10.5194/ejm-32-27-2020), 2020-01-15
Supplement: Supplementary file 1 [file ejm-32-27-2020-supplement.zip › Table S1 H2O compounds.xlsx]

## Sheet: Tabelle1
no1	Chemical composition2	Compound name	nx	ny	nz	<nD>obs3	<nD>(calc)4	Dn5	Vm(Å3)	aobs (Å3)	n(H2O)obs	n(H2O)calc using a(CN)	n(H2O)calc using a(mean)	n(obs)/n(calc) using a(CN)	n(obs)/n(calc) using a(mean)	year	journal CODEN	journal	vol	page
1	MgCl2 · 6H2O	bischofite	1.492	1.506	1.519	1.5057	1.494	0.012	212.37	17.926	6	6.26	6.25	0.958466	0.96	1932	XDIGAS	U.S. Geol. Surv. Bull.	833	80
2	CaCl2 · 2H2O	sinjarite	1.54	1.54	1.54	1.54	1.556	-0.016	132.81	11.975	2	1.77	1.88	1.12994	1.06383	1980	AMMIAY	Am. Miner.	65	1069
3	CaCl2 · 6H2O	antarcticite	1.5504	1.5504	1.4949	1.5319	1.518	0.014	212.43	18.866	6	6.33	6.24	0.947867	0.961538	1934	ZEKRDZ	Z. Kristallogr.	87	43
4	BaCl2 · 2H2O		1.6290	1.6419	1.6583	1.6431	1.639	0.004	130.69	14.019	2	2.06	2.16	0.970874	0.925926	1931	ZEKRDZ	Z. Kristallogr.	77A	84
5	MnCl2 · 4H2O		1.555	1.575	1.607	1.579	1.581	-0.002	162.19	15.679	4	3.97	3.98	1.00756	1.00503	1931	REF-W1	REF-W1*	2	171
6	Fe0.91Mg0.09Cl2 · 2H2O	rokühnite	1.605	1.633	1.703	1.647	1.655	-0.008	113.16	12.212	2	1.9	1.9	1.05263	1.05263	1980	NJMMAW	Neues Jahrb. Mineral., Monatsh.	1980	125
7	CuCl2 · 2H2O	eriochalcite	1.646	1.685	1.745	1.692	1.677	0.015	112.3	12.946	2	2.19	2.19	0.913242	0.913242	1938	AMMIAY	Am. Miner.	23	85
8	LiAl2(OH)6Cl · H2O		1.540	1.543	1.581	1.5547	1.556	-0.001	171.98	15.928	1	0.97	0.9	1.03093	1.11111	1997	CMATEX	Chemistry of Materials	9	241
9	LiAl2(OH)6Cl · H2O		1.545	1.550	1.588	1.561	1.554	0.007	172.73	16.18	1	1.14	1.07	0.877193	0.934579	2009	INOCAJ	Inorg. Chem.	48	11646
10	Na0.3Cu4Al3(OH)14F3 · 2H2O	khaidarkanite	1.585	1.615	1.648	1.616	1.62	-0.004	368.01	37.834	2	1.85	1.8	1.08108	1.11111	1997	DKCHAY	Dokl. Chem.	353	45
11	Sr0.94Ca0.06AlF4(OH) · H2O	tikhonenkovite	1.452	1.456	1.458	1.4553	1.45	0.005	113.48	8.617	1	1.06	1.14	0.943396	0.877193	1964	AMMIAY	Am. Miner.	49	1774
12	Mg2Cl(OH)3 · 4H2O	korshunovskite	1.516	1.538	1.547	1.5337	1.524	0.01	185.07	16.491	4	4.2	4.18	0.952381	0.956938	1983	AMMIAY	Am. Miner.	68	643
13	Mg6.19Cr1.21Fe0.51Al0.15(OH)16Cl1.62(CO3)0.17(SO4)0.01 · 4H2O	woodallite	1.555	1.555	1.535	1.5483	1.547	0.001	536.37	49.11	4	4.09	4.03	0.977995	0.992556	2001	MNLMBB	Mineral. Mag.	65	427
14	Mg5.9Fe0.1Fe3+2(OH)16Cl1.4(OH)0.48(CO3)0.06 · 4H2O	iowaite	1.561	1.561	1.543	1.555	1.558	-0.003	541.6	50.191	4	3.81	3.74	1.04987	1.06952	1994	MNLMBB	Mineral. Mag.	58	79
15	Cu5Cl2(OH)8 · 2H2O	bobkingite	1.724	1.745	1.750	1.7397	1.733	0.007	286.05	35.185	2	2.46	2.42	0.813008	0.826446	2002	MNLMBB	Mineral. Mag.	66	301
16	Zn5(OH)8Cl2 · H2O	simonkolleite	1.657	1.657	1.700	1.6713	1.667	0.004	273.15	30.567	1	1.12	1.12	0.892857	0.892857	1985	NJMMAW	Neues Jahrb. Mineral., Monatsh.	1985	145
17	KMgCl3 · 6H2O	carnallite	1.465	1.474	1.496	1.4783	1.474	0.004	288.3	23.01	6	6.15	6.25	0.97561	0.96	1932	XDIGAS	U.S. Geol. Surv. Bull.	833	23
18	KMgCl3 · 6H2O	carnallite	1.4665	1.4753	1.4937	1.4785	1.474	0.005	288.3	23.018	6	6.15	6.25	0.97561	0.96	1907	NJMKAQ	N. Jb. Mineral., Geol. Palaeontol.	I	192
19	K2CuCl4 · 2H2O	mitscherlichite	1.6365	1.6365	1.6148	1.6293	1.62	0.009	221.8	23.289	2	2.22	2.3	0.900901	0.869565	1951	REF-P2	REF-P2*	II	100
20	MgSiF6 · 6H2O		1.3440	1.3440	1.3601	1.3494	1.346	0.003	255.66	14.831	6	6.09	6.02	0.985222	0.996678	2002	JPCRBU	J. Phys. Chem. Ref. Data	31	931
21	MnSiF6 · 6H2O		1.3568	1.3568	1.3738	1.3625	1.366	-0.003	265.6	15.996	6	5.9	5.85	1.01695	1.02564	2002	JPCRBU	J. Phys. Chem. Ref. Data	31	931
22	FeSiF6 · 6H2O		1.3638	1.3638	1.3845	1.3707	1.376	-0.005	257.7	15.88	6	5.86	5.81	1.02389	1.0327	2002	JPCRBU	J. Phys. Chem. Ref. Data	31	931
23	NiSiF6 · 6H2O		1.3902	1.3902	1.4060	1.3955	1.392	0.004	240.65	15.838	6	6.09	6.03	0.985222	0.995025	2002	JPCRBU	J. Phys. Chem. Ref. Data	31	931
24	CuSiF6 · 6H2O		1.4092	1.4092	1.4090	1.4091	1.414	-0.005	235.1	16.018	6	5.88	5.82	1.02041	1.03093	2002	JPCRBU	J. Phys. Chem. Ref. Data	31	931
25	ZnSiF6 · 6H2O		1.3823	1.3823	1.3954	1.3867	1.385	0.002	245.3	15.779	6	6.04	5.99	0.993377	1.00167	2002	JPCRBU	J. Phys. Chem. Ref. Data	31	931
26	Ca3Al2SO4(OH)2F8 · 2H2O	creedite	1.461	1.478	1.485	1.4747	1.476	-0.001	295.48	23.401	2	1.97	1.85	1.01523	1.08108	1916	AMMIAY	Am. Miner.	1	87
27	Ca3.05Nd0.32Y0.15La0.12Sm0.09Ce0.07Pr0.07Gd0.05Dy0.02Ho0.01Al2SO4F13 · 12H2O	chukhrovite-(Nd)	1.443	1.443	1.443	1.443	1.454	-0.011	588.38	43.455	12	11.28	11.8	1.06383	1.01695	2005	NDMIDF	Nov. Dannye Miner.	40	5
28	H2O	ice	1.3091	1.3091	1.3105	1.3096	1.3	0.01	32.58	1.648	1	1.02	1.02	0.980392	0.980392	2002	JPCRBU	J. Phys. Chem. Ref. Data	31	931
29	H2O	ice	1.3091	1.3091	1.3105	1.3096	1.304	0.006	32.14	1.648	1	1.02	1.02	0.980392	0.980392	2002	JPCRBU	J. Phys. Chem. Ref. Data	31	931
30	Ca4Al2SO4(OH)12 · 6H2O	kuzelite	1.504	1.504	1.488	1.4987	1.5	-0.001	256.5	21.35	3	2.97	3.03	1.0101	0.990099	1929	JRNBAG	J. Res. Natl. Bur. Stand.	2	715
31	Ca8Al4(OH)24(CO3)Cl2 · 9.6H2O	hydrocalumite	1.535	1.553	1.557	1.5483	1.543	0.005	906.64	83.011	9.6	10.08	10.97	0.952381	0.875114	1988	NJMMAW	Neues Jahrb. Mineral., Monatsh.	1988	462
32	Ca8Al4(OH)24(CO3)0.92Cl1.92 · 10.2H2O	hydrocalumite	1.535	1.553	1.557	1.5483	1.548	0	909.73	83.294	10.2	10.2	11.09	1	0.919748	1988	NJMMAW	Neues Jahrb. Mineral., Monatsh.	1988	462
33	Ni6Al2(OH)16CO3 · 4H2O	takovite	1.605	1.605	1.598	1.6027	1.601	0.002	478.85	48.173	4	4.1	4.07	0.97561	0.982801	1972	AMMIAY	Am. Miner.	57	1559
34	LiAl2(OH)7 · 2H2O		1.545	1.545	1.555	1.5483	1.547	0.001	169.81	15.548	2	2.02	1.95	0.990099	1.02564	1993	CMATEX	Chemistry of Materials	5	297
35	B3O4(OH) · H2O	clinometaborite	1.434	1.570	1.588	1.5307	1.541	-0.01	106.5	9.436	1	0.87	0.88	1.14943	1.13636	2011	CAMIA6	Can. Mineral.	49	1273
36	B3O4(OH) · H2O	clinometaborite	1.434	1.570	1.588	1.5307	1.55	-0.019	105.51	9.349	1	0.76	0.77	1.31579	1.2987	2000	CSCMCS	Cryst. Struct. Commun.	C56	276
37	B3O4(OH) · H2O	clinometaborite	1.434	1.570	1.588	1.5307	1.546	-0.015	106.44	9.431	1	0.81	0.82	1.23457	1.21951	1963	ACCRA9	Acta Crystallogr.	16	385
38	Be2BO3(OH) · H2O	berborite	1.580	1.580	1.485	1.5483	1.55	-0.002	90.82	8.315	1	0.98	1.01	1.02041	0.990099	1968	AMMIAY	Am. Miner.	53	348
39	Na2B4O5(OH)4 · 3H2O	tincalconite	1.4625	1.4625	1.4746	1.4665	1.475	-0.008	253.26	19.71	2.667	2.42	2.36	1.10207	1.13008	2002	JPCRBU	J. Phys. Chem. Ref. Data	31	931
40	Na2B4O6(OH)2 · 3H2O	kernite	1.454	1.472	1.488	1.4713	1.479	-0.008	238.35	18.743	3	2.8	2.93	1.07143	1.02389	1927	AMMIAY	Am. Miner.	12	24
41	Na2B4O5(OH)4 · 8H2O	borax	1.4467	1.4693	1.4723	1.4628	1.466	-0.003	370.96	28.635	8	7.86	7.93	1.01781	1.00883	2002	JPCRBU	J. Phys. Chem. Ref. Data	31	931
42	Na4B10O14(OH) 6 · 4H2O	ezcurrite	1.472	1.506	1.526	1.5013	1.504	-0.003	484.71	40.562	4	3.87	3.96	1.03359	1.0101	1957	ECGLAL	Econ. Geol. Bull. Soc. Econ. Geol.	52	426
43	NaCaB5O7(OH)4 · 3H2O	probertite	1.515	1.520	1.538	1.5243	1.533	-0.009	273.58	23.95	3	2.73	2.62	1.0989	1.14504	1929	AMMIAY	Am. Miner.	14	427
44	NaCaB5O8(OH)2 · 3H2O	tuzlaite	1.532	1.544	1.561	1.5457	1.548	-0.002	247.25	22.528	3	2.93	2.77	1.02389	1.08303	1994	AMMIAY	Am. Miner.	79	562
45	K2B4O5(OH)4 · 2H2O		1.4634	1.4659	1.4801	1.4698	1.475	-0.005	260.42	20.411	2	1.85	1.9	1.08108	1.05263	2000	CRTEDF	Cryst. Res. and Technol.	35	1151
46	KB5O6(OH)4 · 2H2O	santite	1.4211	1.4336	1.4863	1.447	1.451	-0.004	279.4	20.824	2	1.86	1.96	1.07527	1.02041	1976	JOSAAH	J. Opt. Soc. Am.	66	72
47	KMg2HB12O16(OH)10 · 4H2O	kaliborite	1.508	1.527	1.5490	1.528	1.534	-0.006	568.58	50.125	4	3.59	3.52	1.11421	1.13636	1965	AMMIAY	Am. Miner.	50	1079
48	KCa4B22O32(OH)10Cl · 4H2O	volkovskite	1.539	1.540	1.605	1.5613	1.566	-0.005	894.7	83.86	4	3.54	3.17	1.12994	1.26183	2013	CAMIA6	Can. Mineral.	51	157
49	RbB5O6(OH)4 · 2H2O		1.4834	1.4283	1.4249	1.4455	1.45	-0.004	289.13	21.477	2	1.85	2.01	1.08108	0.995025	2000	CRTEDF	Cryst. Res. and Technol.	35	125
50	(NH4)B5O7(OH)2 · H2O	larderellite	1.493	1.509	1.561	1.521	1.532	-0.011	208.84	18.166	1	0.72	0.74	1.38889	1.35135	1970	CMPEAP	Contrib. Mineral. Petrol.	27	159
51	(NH4)3B15O20(OH)8 · 4H2O	ammonioborite	1.470	1.487	1.540	1.499	1.503	-0.004	702.78	58.535	4	3.61	3.59	1.10803	1.11421	1933	AMMIAY	Am. Miner.	18	480
52	MgB6O7(OH)6 · 2H2O	aksaite	1.472	1.503	1.526	1.5003	1.513	-0.013	285.23	23.821	2	1.59	1.54	1.25786	1.2987	1968	RFHIII	Hintze (1968)	III	3
53	MgB3O3(OH)5 · 5H2O	kurnakovite	1.489	1.510	1.525	1.508	1.513	-0.005	250.62	21.253	5	4.86	4.8	1.02881	1.04167	1941	AMMIAY	Am. Miner.	26	293
54	Ca2B5O7(OH)5 · H2O	priceite	1.573	1.595	1.597	1.5883	1.599	-0.011	234.18	23.002	1	0.71	0.51	1.40845	1.96078	1956	AMMIAY	Am. Miner.	41	689
55	Ca2B5O7(OH)5 · H2O	priceite	1.572	1.591	1.594	1.5857	1.599	-0.013	234.18	22.898	1	0.64	0.44	1.5625	2.27273	1939	AMMIAY	Am. Miner.	24	728
56	CaB3O4(OH)3 · H2O	colemanite	1.586	1.592	1.614	1.5973	1.611	-0.014	140.1	13.97	1	0.77	0.68	1.2987	1.47059	1993	CAMIA6	Can. Mineral.	31	297
57	CaB3O4(OH)3 · H2O	colemanite	1.5861	1.5919	1.6139	1.5973	1.61	-0.013	140.56	14.015	1	0.8	0.71	1.25	1.40845	1956	NJMMAW	Neues Jahrb. Mineral., Monatsh.	1956	265
58	CaB2BO3(OH)5 · H2O	meyerhofferite	1.500	1.535	1.560	1.5317	1.537	-0.005	174.76	15.514	1	0.89	0.8	1.1236	1.25	1916	XDIGAS	U.S. Geol. Surv. Bull.	610	35
59	CaB2(OH)8 · 2H2O	hexahydroborite	1.498	1.503	1.510	1.5037	1.495	0.009	206.72	17.38	2	2.2	2.09	0.909091	0.956938	1977	ZVMOAG	Zap. Vses. Mineral. O-va.	106	691
60	CaB2O(OH)6 · 2H2O	pentahydroborite	1.531	1.536	1.544	1.537	1.544	-0.007	177.44	15.91	2	1.85	1.82	1.08108	1.0989	1962	AMMIAY	Am. Miner.	47	1482
61	Ca3B6O6(OH)12 · 2H2O	nifontovite	1.575	1.578	1.584	1.579	1.573	0.006	369.5	35.72	2	2.25	1.79	0.888889	1.11732	1962	AMMIAY	Am. Miner.	47	172
62	CaB6O9(OH)2 · 3H2O	nobleite	1.500	1.520	1.554	1.5247	1.536	-0.011	266.6	23.354	3	2.64	2.44	1.13636	1.22951	1961	XIPPAN	U.S. Geol. Surv. Prof. Pap.	424C	294
63	CaB6O8(OH)4 · 3H2O	gowerite	1.484	1.501	1.550	1.5117	1.517	-0.005	294.23	25.133	3	2.81	2.62	1.06762	1.14504	1959	AMMIAY	Am. Miner.	44	911
64	Ca9B26O34(OH)24Cl4 · 13H2O	ruitenbergite	1.542	1.545	1.565	1.5507	1.55	0.001	1538.5	141.464	12	11.92	11.1	1.00671	1.08108	1993	CAMIA6	Can. Mineral.	31	795
65	Ca9B26O34(OH)24Cl4 · 13H2O	pringleite	1.537	1.548	1.570	1.5517	1.546	0.006	1550	142.78	12	12.84	11.95	0.934579	1.00418	1993	CAMIA6	Can. Mineral.	31	795
66	CaB3O3(OH)5·4H2O	inyoite	1.495	1.505	1.516	1.5053	1.512	-0.007	246.03	20.754	4	3.83	3.74	1.04439	1.06952	1916	XDIGAS	U.S. Geol. Surv. Bull.	610	35
67	Ca4[B4O4(OH)6]4 · 19H2O	alfredstelznerite	1.476	1.478	1.494	1.4827	1.49	-0.007	1253.25	100.941	19	18	17.76	1.05556	1.06982	2010	CAMIA6	Can. Mineral.	48	123
68	CaNaB5O6(OH)6 · 5H2O	ulexite	1.491	1.506	1.529	1.505	1.508	-0.003	344.22	29.229	5	5.01	4.96	0.998004	1.00806	1978	AMMIAY	Am. Miner.	63	160
69	CaMgB6O8(OH)6 · 3H2O	hydroboracite	1.522	1.534	1.569	1.5417	1.555	-0.013	316.11	28.591	3	2.51	2.37	1.19522	1.26582	1928	FESTGO	Festschrift, Victor M. Goldschmidt, Winters Universitätsbuchhandlung	I	256
70	SrB6O9(OH)2 · 3H2O	tunellite	1.519	1.534	1.569	1.5407	1.544	-0.003	268.96	24.281	3	2.91	2.75	1.03093	1.09091	1961	XIPPAN	U.S. Geol. Surv. Prof. Pap.	424C	294
71	SrCaB14O20(OH)6 · 5H2O	strontioginorite	1.514	1.526	1.575	1.5383	1.549	-0.011	580.07	52.141	5	4.3	4.12	1.16279	1.21359	1970	AMMIAY	Am. Miner.	55	1911
72	Sr1.06Ca0.94B14O20(OH)6 · 5H2O	strontioginorite	1.515	1.526	1.574	1.5383	1.548	-0.01	581.45	52.265	5	4.37	4.17	1.14416	1.19904	2005	CAMIA6	Can. Mineral.	43	1019
73	Na1.84K0.16Sr0.83Ca0.17SO4B5O8(OH) · 2H2O	fontarnauite	1.5170	1.5390	1.5420	1.5327	1.54	-0.007	300.5	26.726	2	1.73	1.62	1.15607	1.23457	2015	CAMIA6	Can. Mineral.	53	803
74	Mg3B2(PO4)2(OH)6 · 6H2O	lüneburgite	1.521	1.541	1.547	1.5363	1.537	-0.001	372.7	33.376	6	5.96	5.85	1.00671	1.02564	1932	XDIGAS	U.S. Geol. Surv. Bull.	833	80
75	Na3H(CO3)2 · 2H2O	trona	1.410	1.492	1.542	1.4813	1.487	-0.006	176.63	14.187	2	1.89	2.04	1.0582	0.980392	1962	REFL8	REFL8*	II	49
76	Na2CO3 · H2O	thermonatrite	1.421	1.505	1.524	1.4833	1.484	-0.001	91.25	7.36	1	0.99	1.04	1.0101	0.961538	1921	BUGMAF	Geol. Soc. Amer. Bull.	679	143
77	Na0.93Ca0.87Nd0.09La0.03Sr2.95Ba0.05Y(CO3)6 · 3H2O	donnayite-(Y)	1.556	1.646	1.652	1.618	1.612	0.006	425.52	43.887	3	3.3	2.88	0.909091	1.04167	1978	CAMIA6	Can. Mineral.	16	335
78	Na2Cu(CO3)2 · 3H2O	chalconatronite	1.483	1.530	1.576	1.5297	1.518	0.012	203.67	18.012	3	3.27	3.36	0.917431	0.892857	1962	REFL8	REFL8*	II	208
79	Na2Zn3(CO3)4 · 3H2O		1.540	1.540	1.540	1.54	1.549	-0.009	325.3	29.331	3	2.66	2.78	1.12782	1.07914	1964	REF-W2	REF-W2*	1	96
80	Na6Ba0.98Ca0.02Th0.95Fe3+0.05(CO3)6 · 6H2O	tuliokite	1.574	1.574	1.587	1.5783	1.568	0.01	499.11	48.194	6	6.56	6.02	0.914634	0.996678	1992	AMMIAY	Am. Miner.	77	209
81	K2Mg(CO3)2 · 4H2O	baylissite	1.465	1.485	1.535	1.495	1.489	0.006	238.97	19.743	4	4.17	4.31	0.959233	0.928074	1964	REF-W2	REF-W2*	1	96
82	MgCO3 · 3H2O	nesquehonite	1.412	1.501	1.526	1.4797	1.486	-0.006	125.24	10.024	3	2.91	2.9	1.03093	1.03448	1962	REFL8	REFL8*	II	68
83	MgCO3 · 5H2O	lansfordite	1.4559	1.4755	1.5023	1.4779	1.468	0.01	171.78	13.698	5	5.18	5.17	0.965251	0.967118	1962	REFL8	REFL8*	II	68
84	MgCO3 · 5H2O	lansfordite	1.456	1.468	1.507	1.477	1.468	0.009	171.78	13.672	5	5.16	5.15	0.968992	0.970874	1924	AMMIAY	Am. Miner.	9	225
85	MgCO3 · 5H2O	lansfordite	1.456	1.469	1.508	1.4777	1.468	0.01	171.78	13.691	5	5.18	5.17	0.965251	0.967118	1964	REF-W2	REF-W2*	1	94
86	CaCO3 · H2O	monohydrocalcite	1.590	1.590	1.543	1.5743	1.594	-0.02	81.09	7.776	1	0.82	0.94	1.21951	1.06383	2008	AMMIAY	Am. Miner.	93	1014
87	CaCO3 · H2O	monohydrocalcite	1.590	1.590	1.543	1.5743	1.596	-0.022	80.86	7.754	1	0.8	0.92	1.25	1.08696	1962	REFL8	REFL8*	II	83
88	CaCO3 · 6H2O	ikaite	1.460	1.535	1.545	1.5133	1.507	0.006	188.52	16.156	6	6.14	6.11	0.977199	0.981997	1964	REF-W2	REF-W2*	1	95
89	CaNa2(CO3)2 · 2H2O	pirssonite	1.5043	1.5095	1.5751	1.5296	1.529	0.001	171.31	15.149	2	2.02	1.99	0.990099	1.00503	1962	USGSP5	U.S. Geol. Surv. Prof. Pap.	405	1
90	CaNa2(CO3)2 · 5H2O	gaylussite	1.4435	1.5156	1.5233	1.4941	1.489	0.005	247.29	20.395	5	5.14	5.21	0.972763	0.959693	1962	USGSP5	U.S. Geol. Surv. Prof. Pap.	405	1
91	Ce1.03La0.67Nd0.26Pr0.10(CO3)3 · 4H2O	calkinsite-(Ce)	1.569	1.657	1.686	1.6373	1.625	0.012	270.57	28.769	4	4.36	4.15	0.917431	0.963855	1953	AMMIAY	Am. Miner.	38	1169
92	Ce0.78La0.55Nd0.55Sm0.09Gd0.05Y0.04(CO3)3 · 8H2O	lanthanite-(Ce)	1.532	1.594	1.616	1.5807	1.576	0.005	360	34.902	8	8.2	7.99	0.97561	1.00125	1985	AMMIAY	Am. Miner.	70	411
93	Nd0.79La0.73Pr0.19Sm0.14Gd0.06Eu0.06Dy0.01Y0.01(CO3)3 · 8H2O	lanthanite-(Nd)	1.532	1.590	1.614	1.5787	1.572	0.007	358.85	34.671	8	8.27	8.06	0.967352	0.992556	1981	AMMIAY	Am. Miner.	66	637
94	NaCa2.98Sr0.02(CO3)2F2.9(OH)0.10 · H2O	sheldrickite	1.538	1.538	1.563	1.5463	1.544	0.002	196.47	17.923	1	1.05	0.73	0.952381	1.36986	1997	CAMIA6	Can. Mineral.	35	181
95	Na1.05Ni7.8Mg0.36(C6.88Al0.08Si0.04S0.03)O20.79(OH)3.97 · 6H2O	kambaldaite	1.65	1.65	1.69	1.6633	1.66	0.003	564.51	62.433	6	6.34	6.39	0.946372	0.938967	1985	AMMIAY	Am. Miner.	70	419
96	Mg2CO3(OH)2 · 3H2O	artinite	1.4900	1.5340	1.5680	1.5307	1.523	0.008	160.12	14.187	3	3.14	3.12	0.955414	0.961538	1921	BUGMAF	Geol. Soc. Amer. Bull.	679	42
97	Mg5(CO3)4(OH)2 · 4H2O	hydromagnesite	1.523	1.527	1.545	1.5317	1.543	-0.011	345.05	30.631	4	3.53	3.48	1.13314	1.14943	1923	AJSCAP	Amer. J. Sci.	6	37
98	Mg4Al2(OH)12CO3 · 3H2O	hydrotalcite	1.511	1.511	1.495	1.5057	1.513	-0.007	365.94	30.889	3	2.69	2.63	1.11524	1.14068	1941	AMMIAY	Am. Miner.	26	295
99	Mg4Al2(OH)12CO3 · 3H2O	hydrotalcite	1.516	1.516	1.504	1.512	1.513	-0.001	365.94	31.279	3	2.97	2.9	1.0101	1.03448	1941	AMMIAY	Am. Miner.	26	295
100	Mg4Al2(OH)12CO3 · 3H2O	hydrotalcite	1.511	1.511	1.495	1.5057	1.509	-0.003	368.94	31.143	3	2.85	2.79	1.05263	1.07527	1969	NJMMAW	Neues Jahrb. Mineral., Monatsh.	1969	544
101	Mg4Al2(OH)12CO3 · 3H2O	hydrotalcite	1.516	1.516	1.504	1.512	1.509	0.003	368.94	31.535	3	3.13	3.06	0.958466	0.980392	1969	NJMMAW	Neues Jahrb. Mineral., Monatsh.	1969	544
102	Mg4.01Al1.99(OH)12CO3 · 3H2O	quintinite	1.533	1.533	1.533	1.533	1.53	0.003	364.33	32.424	3	3.12	3.06	0.961538	0.980392	2010	MNLMBB	Mineral. Mag.	74	821
103	Mg3.95Fe0.05Al1.93Fe3+0.07(OH)12CO3 · 3H2O	quintinite	1.533	1.533	1.533	1.533	1.532	0.001	366.29	32.598	3	3.02	2.96	0.993377	1.01351	1997	CAMIA6	Can. Mineral.	35	151
104	Mg6.12Cr1.88CO3(OH)16 · 4H2O	stichtite	1.545	1.545	1.518	1.536	1.538	-0.002	520.13	46.55	4	3.82	3.76	1.04712	1.06383	2011	AMMIAY	Am. Miner.	96	179
105	Mg6.12Cr1.88CO3(OH)16 · 4H2O	stichtite	1.542	1.542	1.516	1.5333	1.538	-0.005	520.13	46.318	4	3.66	3.61	1.0929	1.10803	2011	AMMIAY	Am. Miner.	96	179
106	Mg6Mn2CO3(OH)16 · 4H2O	desautelsite	1.569	1.569	1.547	1.5617	1.557	0.005	523.73	49.118	4	4.26	4.19	0.938967	0.954654	1979	AMMIAY	Am. Miner.	64	127
107	Mg10Fe2CO3(OH)24 · 2H2O	coalingite	1.594	1.594	1.563	1.5837	1.578	0.006	630.58	61.449	2	2.38	2.28	0.840336	0.877193	1965	AMMIAY	Am. Miner.	50	1893
108	Mg6Fe3+2CO3(OH)16 · 4H2O	pyroaurite	1.573	1.573	1.550	1.5653	1.558	0.007	523.97	49.461	4	4.46	4.4	0.896861	0.909091	1941	AMMIAY	Am. Miner.	26	295
109	Mg6Fe3+2CO3(OH)16 · 4H2O	pyroaurite	1.560	1.560	1.543	1.5543	1.558	-0.004	522.76	48.387	4	3.74	3.67	1.06952	1.08992	1941	AMMIAY	Am. Miner.	26	295
110	Ca1.2Nd0.9Ce0.64Sm0.33Gd0.28Y0.26Pr0.15La0.14Dy0.07Tm0.03(CO3)4(OH)3 · H2O	calcioancylite-(Nd)	1.660	1.725	1.76	1.715	1.716	-0.001	303.89	36.168	1	0.96	0.45	1.04167	2.22222	1990	EJMIER	Eur. J. Mineral.	2	413
111	Ca4Al2(OH)12(CO3) · 5H2O	calciumaluminatecarbonate	1.532	1.532	1.554	1.5393	1.537	0.002	433.02	38.996	5	5.1	5.22	0.980392	0.957854	1960	JNBAAR	J. Res. Nat. Bur. Stand. ,A	64A	333
112	Sr0.86Ca0.09Ba0.01Ce0.53La0.30Nd0.12Pr0.04Sm0.01(CO3)2(OH) · H2O	ancylite-(Ce)	1.620	1.695	1.730	1.6817	1.682	0	158.7	18.028	1	0.99	0.77	1.0101	1.2987	1962	REFL8	REFL8*	II	144
113	Sr0.89Ca0.11Ba0.02La0.60Ce0.38Nd0.02(CO3)2(OH) · H2O	ancylite-(La)	1.640	1.717	1.731	1.696	1.69	0.006	158.5	18.375	1	1.11	0.88	0.900901	1.13636	1998	AMMIAY	Am. Miner.	83	652
114	Cu2.56Zn0.38Mn0.06(CO3)(OH)4 · 4H2O	claraite	1.751	1.751	1.645	1.7157	1.734	-0.018	193.42	23.041	4	3.61	3.59	1.10803	1.11421	1982	CERDAA	Chem. Erde	41	97
115	Ca0.16Na0.11Mn0.02Ce0.98La0.47Pr0.09Nd0.29Sm0.06Gd0.02Ti0.82Nb0.12(Si0.97Al0.03)O6(CO2OH)2 · H2O	kihlmanite-(Ce)	1.708	1.76	1.82	1.7627	1.759	0.004	266.5	33.764	1	1.12	1.17	0.892857	0.854701	2014	MNLMBB	Mineral. Mag.	78	483
116	Sr1.08Ca3.78Na0.11Ba0.02Mg0.04Cu2+0.07Cr8(S0.96Si0.04O4)(CO3)8(OH)16 · 25H2O	putnisite	1.552	1.583	1.599	1.578	1.588	-0.01	1431.75	138.172	25	23.61	22.9	1.05887	1.0917	2014	MNLMBB	Mineral. Mag.	78	131
117	LiNO3 · 3H2O		1.365	1.490	1.523	1.4593	1.463	-0.004	126.89	9.721	3	2.95	2.91	1.01695	1.03093	1964	REF-W2	REF-W2*	1	102
118	Na3NO3SO4 · H2O	darapskite	1.391	1.480	1.489	1.4533	1.468	-0.015	184.13	13.92	1	0.68	0.78	1.47059	1.28205	1977	MNLMBB	Mineral. Mag.	41	548
119	Hg(OH)(NO3) · H2O		1.69	1.72	1.92	1.7767	1.757	0.02	110.95	14.305	1	1.23	1.23	0.813008	0.813008	1964	REF-W2	REF-W2*	1	104
120	Mg(NO3)2 · 6H2O	nitromagnesite	1.344	1.506	1.506	1.452	1.457	-0.005	259.38	19.551	6	5.85	5.84	1.02564	1.0274	1962	REFL8	REFL8*	II	68
121	MgTh(NO3)6 · 8H2O		1.509	1.525	1.526	1.52	1.512	0.008	536.62	46.588	8	8.47	8.33	0.94451	0.960384	1954	REF-S	REF-S*	I	818
122	Ca(NO3)2 · 2H2O		1.488	1.538	1.577	1.5343	1.543	-0.009	154.3	13.766	2	1.84	1.75	1.08696	1.14286	1964	JAFCAU	J. Agric. Food Chem.	12	478
123	Ca(NO3)2 · 3H2O		1.465	1.493	1.502	1.4867	1.493	-0.006	191.12	15.522	3	2.86	2.77	1.04895	1.08303	1964	JAFCAU	J. Agric. Food Chem.	12	478
124	Ca(NO3)2 · 4H2O		1.465	1.498	1.504	1.489	1.504	-0.015	205.94	16.807	4	3.66	3.57	1.0929	1.12045	1962	REFL8	REFL8*	II	68
125	Ca4Al2(NO3)2(OH)12 · 4H2O		1.502	1.502	1.532	1.512	1.509	0.003	492.55	42.101	4	4.15	3.51	0.963855	1.1396	1964	REF-W2	REF-W2*	1	104
126	La(NO3)3 · 6H2O		1.458	1.552	1.593	1.5343	1.538	-0.004	306.21	27.319	6	5.87	5.68	1.02215	1.05634	1970	RFNBSM	RFNBSM*	8	40
127	La2Mg3(NO3)12 · 24H2O		1.5220	1.5220	1.5150	1.5197	1.517	0.003	1207.2	104.738	24	24.41	23.84	0.983204	1.00671	1962	REFL8	REFL8*	II	142
128	Ce2Mg3(NO3)12 · 24H2O		1.5249	1.5249	1.5176	1.5225	1.515	0.008	1209.2	105.479	24	25.03	24.52	0.958849	0.978793	1962	REFL8	REFL8*	II	143
129	Li0.37Na0.24Cs0.11Mg0.04Be2.58B0.06Al2.02Si5.94O18 · 0.67H2O	beryl	1.5920	1.5920	1.5844	1.5895	1.59	0	339	33.361	0.67	0.77	0.8	0.87013	0.8375	2002	JPCRBU	J. Phys. Chem. Ref. Data	31	931
130	Na0.04Be3.06Al1.93Fe0.03Mg0.02Zn0.01Si5.97O18 · 0.49H2O	beryl	1.5784	1.5784	1.5730	1.5766	1.576	0.001	338.09	32.549	0.49	0.53	0.51	0.924528	0.960784	2002	JPCRBU	J. Phys. Chem. Ref. Data	31	931
131	Na0.04Be3.06Al1.93Fe3+0.03Mg0.02Zn0.01Si5.97O18 · 0.49H2O	beryl	1.5788	1.5788	1.5732	1.5769	1.576	0.001	338.09	32.567	0.49	0.55	0.52	0.890909	0.942308	2002	JPCRBU	J. Phys. Chem. Ref. Data	31	931
132	Na0.04Cs0.02Be3.06Al1.96Fe0.02Zn0.01Si5.97O18 · 0.41H2O	beryl	1.5775	1.5775	1.5721	1.5757	1.576	0	337.9	32.479	0.41	0.46	0.44	0.891304	0.931818	2002	JPCRBU	J. Phys. Chem. Ref. Data	31	931
133	Na0.03Cs0.04Be3.05Al1.97Fe3+0.01Si5.97O18 · 0.46H2O	beryl	1.5777	1.5777	1.5722	1.5759	1.578	-0.002	337.88	32.488	0.46	0.46	0.44	1	1.04545	2002	JPCRBU	J. Phys. Chem. Ref. Data	31	931
134	Na0.20Cs0.14Be3.15Al1.90Si5.90V0.01O18 · 0.88H2O	beryl	1.5923	1.5923	1.5848	1.5898	1.595	-0.005	339.38	33.418	0.88	0.83	0.84	1.06024	1.04762	2002	JPCRBU	J. Phys. Chem. Ref. Data	31	931
135	Na0.45Al1.26Fe0.16Fe3+0.15Mg0.42Be2.94Si6.07O18 · 0.95H2O	beryl	1.603	1.603	1.595	1.6003	1.594	0.006	343.69	34.443	0.95	1.19	1.16	0.798319	0.818966	1991	MNLMBB	Mineral. Mag.	55	167
136	Na0.32Be3Sc1.25Fe3+0.43Mg0.32Mn0.03Al0.02Si6O18 · 0.8H2O	bazzite	1.6279	1.6279	1.6066	1.6208	1.619	0.002	358.74	37.166	0.8	0.86	0.86	0.930233	0.930233	1995	MIPEE9	Mineral. Petrol.	52	113
137	Na0.55K0.03Cs0.01Be3.06Sc1.26Fe0.31Fe3+0.17Mn0.13Mg0.12Al0.03Si5.93Be0.07O18 · 0.87H2O	bazzite	1.627	1.627	1.607	1.6203	1.618	0.002	359.74	37.241	0.87	0.97	0.97	0.896907	0.896907	1967	AMMIAY	Am. Miner.	52	563
138	Na1.85K0.05Ca0.02ZrSi3O9 · 3H2O	hilairite	1.609	1.609	1.596	1.6047	1.6	0.005	254.93	25.731	3	3.14	3.27	0.955414	0.917431	1974	CAMIA6	Can. Mineral.	12	237
139	Na8KSi9O18(OH)9 · 19H2O	megacyclite	1.460	1.478	1.481	1.473	1.46	0.013	1097.37	86.6	18.75	20.29	21.33	0.924101	0.879044	1994	AMMIAY	Am. Miner.	79	1011
140	Na5.88K0.06Ca0.76Mn0.42Fe3+0.48Ti0.45Si6O18 · 0.9H2O	koashvite	1.637	1.643	1.648	1.6427	1.636	0.007	390.09	41.82	1	1.46	1.33	0.684932	0.75188	1975	AMMIAY	Am. Miner.	60	487
141	Na2.4K0.09Ca0.35Mn0.08Zr0.8Fe0.14Ti0.03Hf0.03Si6O13.2(OH)4.8 · H2O	lovozerite	1.610	1.610	1.570	1.5967	1.584	0.013	392.8	39.125	1	1.6	1.56	0.625	0.641026	2001	CYSTE3	Crystallogr. Rep. (Transl. Kristallografiya)	46	937
142	Na2.53K0.01Mn0.14Ca0.01Fe0.01Zr0.96Ti0.01Hf0.01Si6O12.76(OH)5.24 · 0.5H2O	litvinskite	1.546	1.574	1.575	1.565	1.562	0.003	397.35	37.486	0.5	0.73	0.73	0.684932	0.684932	2001	AMMIAY	Am. Miner.	86	377
143	Na0.95K0.12Mn0.52Zn0.27Fe0.16Mg0.05Ba1.9Sr0.06Ce1.05La0.72Nd0.19Pr0.05Gd0.01Sm0.01Ti2Si8O26F0.73(OH)0.27 · H2O	byelorussite-(Ce)	1.743	1.760	1.820	1.7743	1.773	0.001	573.06	73.674	1	1.08	1.04	0.925926	0.961538	1991	AMMIAY	Am. Miner.	76	665
144	Na4.38K0.579Y0.692Dy0.061Gd0.051Er0.037Yb0.027Th0.025Sm0.020Nd0.013Eu0.012Tb0.011Tm0.007Zr0.743Ti0.152Nb0.088Si6O18 · 6.25H2O	sazykinaite-(Y)	1.585	1.585	1.578	1.5827	1.578	0.005	534.77	52.023	6.25	6.57	6.99	0.951294	0.894134	1995	AMMIAY	Am. Miner.	80	630
145	Na0.04Mg1.72Fe0.27Al3.97Fe3+0.03Si5O18 · 0.49H2O(CO2)0.07	cordierite	1.5358	1.5413	1.5442	1.5404	1.546	-0.006	388.39	35.048	0.49	0.3	0.42	1.63333	1.16667	2002	JPCRBU	J. Phys. Chem. Ref. Data	31	931
146	Na0.03Mg1.97Fe0.03Al3.97Fe3+0.03Si5O18 · 0.41H2O(CO2)0.07	cordierite	1.5318	1.5357	1.5389	1.5355	1.54	-0.004	387.67	34.662	0.41	0.27	0.38	1.51852	1.07895	2002	JPCRBU	J. Phys. Chem. Ref. Data	31	931
147	Na11.2Ca1.22Sr11Ba0.16Zr12.69Y0.63Nb0.6Hf0.14Si41.64B6O132(OH)12 · 12H2O	bobtraillite	1.627	1.627	1.645	1.633	1.629	0.004	1680.32	177.464	6	6.73	7.46	0.89153	0.80429	2005	CAMIA6	Can. Mineral.	43	747
148	Na4.8Ca0.1Zr2Si6O18Cl0.61(OH)0.31 · 2H2O	petarasite	1.595	1.600	1.631	1.6087	1.602	0.007	476.16	48.375	2	2.32	2.56	0.862069	0.78125	1981	CAMIA6	Can. Mineral.	19	411
149	Na12Sr21.16Na1.17Ca0.21Ba4Zr25.33Ti0.93Si77.02B12.98O246(OH)24 · 18H2O	rogermitchellite	1.640	1.640	1.663	1.6477	1.654	-0.006	6070.6	655.788	18	13.75	16.16	1.30909	1.11386	2010	CAMIA6	Can. Mineral.	48	267
150	Na2ZrSi3O9 · H2O	catapleiite	1.593	1.593	1.628	1.6047	1.594	0.011	240.79	24.303	2	2.39	2.39	0.83682	0.83682	1923	AMMIAY	Am. Miner.	8	70
151	Na2ZrSi3O9 · H2O	catapleiite	1.591	1.592	1.627	1.6033	1.594	0.009	240.79	24.25	2	2.35	2.35	0.851064	0.851064	1923	AMMIAY	Am. Miner.	8	70
152	K2Ca4Na0.12Ca0.15Be4.23Al1.86Si23.88O60 · 1.85H2O	milarite	1.5385	1.5385	1.537	1.5375	1.546	-0.008	1294.2	116.26	1.85	0.61	1.07	3.03279	1.72897	1980	CAMIA6	Can. Mineral.	18	41
153	KNaZrSi3O9 · 2H2O	georgechaoite	1.578	1.597	1.606	1.5937	1.583	0.011	257.88	25.558	2	2.31	2.58	0.865801	0.775194	1985	CAMIA6	Can. Mineral.	23	1
154	K0.96Na0.09CaSi4O9(OH) · 3H2O	shlykovite	1.500	1.509	1.515	1.508	1.503	0.005	302.27	25.633	3	3.16	3.28	0.949367	0.914634	2010	GEOOD1	Geol. Ore Deposits	52	767
155	K2ZrSi3O9 · H2O	kostylevite	1.595	1.598	1.610	1.601	1.598	0.003	244.35	24.514	1	1.08	1.35	0.925926	0.740741	1984	AMMIAY	Am. Miner.	69	813
156	K2Zr0.77Ti0.23Si3O9 · H2O	umbite	1.596	1.610	1.619	1.6083	1.607	0.001	242.39	24.612	1	1.04	1.29	0.961538	0.775194	1984	AMMIAY	Am. Miner.	69	813
157	Ca7Si6O18(CO3) · 2H2O	scawtite	1.595	1.605	1.622	1.6073	1.604	0.003	501.2	50.808	2	2.17	2.53	0.921659	0.790514	1955	AMMIAY	Am. Miner.	40	510
158	Ca0.43Mn0.36Na0.14K0.03Nb1.82Ti0.16Al0.1Fe0.1Si2O9(O0.88F0.33) · 4H2O	komarovite	1.750	1.766	1.85	1.7887	1.768	0.021	284.78	37.263	4	4.65	4.61	0.860215	0.867679	1972	AMMIAY	Am. Miner.	57	1315
159	Ca2Y1.5Gd0.09Dy0.11Er0.12Yb0.09Sm0.01Nd0.01Ce0.01Si4O12(CO3) · H2O	kainosite-(Y)	1.665	1.685	1.689	1.6797	1.671	0.009	316.51	35.851	1	1.33	1.39	0.75188	0.719424	1964	CAMIA6	Can. Mineral.	8	1
160	Na0.14Ca0.05[Fe1.63Mg0.28Mn0.09][Al1.94Fe3+0.08]Al2Si5O18 · 0.67H2O	sekaninaite	1.561	1.572	1.576	1.5697	1.574	-0.004	392.57	37.341	0.67	0.46	0.52	1.45652	1.28846	1977	AMMIAY	Am. Miner.	62	395
161	CuSiO3 · H2O	dioptase	1.6580	1.6580	1.7097	1.6752	1.675	0	79.39	8.935	1	1	1	1	1	1962	REFL8	REFL8*	II	208
162	CuSiO3 · H2O	dioptase	1.6560	1.6560	1.707	1.673	1.674	-0.001	79.48	8.916	1	0.99	0.98	1.0101	1.02041	2011	JGEOSC	J. Geosci.	56	299
163	CuSiO3 · H2O	dioptase	1.6573	1.6573	1.7091	1.6746	1.674	0.001	79.46	8.934	1	1	1	1	1	2002	JPCRBU	J. Phys. Chem. Ref. Data	31	931
164	CuSiO3 · H2O	dioptase	1.6611	1.6809	1.6886	1.6769	1.674	0.003	79.46	8.964	1	1.02	1.02	0.980392	0.980392	2002	JPCRBU	J. Phys. Chem. Ref. Data	31	931
165	CaZrSi3O9 · 2H2O	calciocatapleiite	1.603	1.603	1.639	1.615	1.615	0	237.97	24.426	2	2	2.05	1	0.97561	2004	CAMIA6	Can. Mineral.	42	1037
166	Ba0.89Na0.1K0.04Ca1.92Sr0.07Na0.03Al6.02Si9O30 · 2H2O	armenite	1.5505	1.5570	1.5590	1.5555	1.552	0.004	692.51	64.235	2	2.3	2.53	0.869565	0.790514	1984	CAMIA6	Can. Mineral.	22	453
167	Ba10Ca2MnTiSi8O26(OH)2Cl8 · 4H2O	muirite	1.697	1.697	1.704	1.6993	1.682	0.017	1109.2	129.192	4	6.11	5.67	0.654664	0.705467	1965	AMMIAY	Am. Miner.	50	314
168	Ba0.95Fe0.02Ca0.01K0.01ZrSi3O9 · 3H2O	komkovite	1.671	1.671	1.644	1.662	1.66	0.002	251.65	27.777	3	3.1	3.21	0.967742	0.934579	1992	AMMIAY	Am. Miner.	77	207
169	LiNa0.04K0.01Ti1.92Nb0.04Mn0.02Fe3+0.01Si4O11.03(OH)2.97 · H2O	punkaruaivite	1.658	1.696	1.726	1.6933	1.701	-0.008	304.85	35.209	1	0.75	0.92	1.33333	1.08696	2010	CAMIA6	Can. Mineral.	48	41
170	Na4Si4O8(OH)4 · 7H2O	yegorovite	1.474	1.479	1.482	1.4783	1.466	0.012	441.07	35.204	7	7.62	7.82	0.918635	0.895141	2009	ZVMOAG	Zap. Vses. Mineral. O-va.	138	82
171	Na2.97Li0.99Ti1.91Nb0.05Fe0.02Si4O14 · 2H2O	lintisite	1.672	1.739	1.802	1.7377	1.722	0.016	320.6	39.331	2	2.55	2.69	0.784314	0.743494	1991	AMMIAY	Am. Miner.	76	1730
172	Na2.67K0.3Ca0.07Mn0.02Zr1.97Nb0.08Ti0.05Si10O26 · 9H2O	natrolemoynite	1.533	1.559	1.567	1.553	1.565	-0.012	749.71	69.227	9	8	8.45	1.125	1.06509	2002	CAMIA6	Can. Mineral.	40	1224
173	Na2.44K2.91(Fe3+1.38Ti0.40Al0.11Mn0.10Mg0.06)Si8O20[(OH)3.8F0.20] · 4H2O	paraershovite	1.569	1.583	1.602	1.5847	1.582	0.003	618.46	60.37	4	4.18	4.17	0.956938	0.959233	2010	CAMIA6	Can. Mineral.	48	279
174	Na4K3Fe0.9Mn0.7Ti0.4Mg0.13Si8O20(OH)4 · 4H2O	ershovite	1.569	1.574	1.590	1.5777	1.583	-0.005	620.77	59.873	5	4.6	4.74	1.08696	1.05485	1994	AMMIAY	Am. Miner.	79	1010
175	Na4K3Fe0.9Mn0.7Ti0.4Mg0.13Si8O20(OH)4 · 4H2O	ershovite	1.569	1.574	1.590	1.5777	1.567	0.011	620.77	59.876	4	4.73	4.8	0.845666	0.833333	1994	AMMIAY	Am. Miner.	79	1010
176	(Na2.29K0.17)(Ti3.39Fe3+0.47Mg0.03Nb0.03)(Si6.63Al1.10Be0.28)O22(OH)4 · 1.16H2O	paravinogradovite	1.707	1.741	1.755	1.7343	1.728	0.006	547.65	66.891	1.16	1.6	1.79	0.725	0.648045	2003	CAMIA6	Can. Mineral.	41	989
177	Na3.97Mn0.04ZrSi6O15(OH)2 · H2O	terskite	1.576	1.582	1.584	1.5807	1.569	0.012	389.43	37.755	1	1.54	1.59	0.649351	0.628931	1984	AMMIAY	Am. Miner.	69	212
178	Na5.96Zn0.84Mn0.1Ti3.85Nb0.07Fe0.04Si8O28 · 4H2O	kukisvumite	1.676	1.746	1.795	1.739	1.721	0.018	649.83	79.86	4	5.33	5.25	0.750469	0.761905	1992	AMMIAY	Am. Miner.	77	1116
179	Na4SnBe2Si6O18 · 2H2O	sørensenite	1.579	1.585	1.586	1.5833	1.568	0.015	411.97	40.123	2	2.75	2.75	0.727273	0.727273	1968	RFHIII	Hintze (1968)	III	631
180	Na4SnBe2Si6O18 · 2H2O	sørensenite	1.576	1.581	1.584	1.5803	1.568	0.012	411.97	39.917	2	2.6	2.61	0.769231	0.766284	1966	AMMIAY	Am. Miner.	51	1547
181	Na4Ce1.5Sr0.5TiSi8O18(OH)3.2F0.4 · 5H2O	seidite-(Ce)	1.542	1.569	1.571	1.5607	1.576	-0.015	644.2	60.309	5	3.89	4.71	1.28535	1.06157	1998	ZVMOAG	Zap. Vses. Mineral. O-va.	127	94
182	Ca0.95Na0.12K0.14Fe5.65Fe3+0.96Mn0.25Mg0.18Ti1.86Nb0.06Zr0.05Si7.91Al0.09O26(OH)5F0.17 · 4H2O	sveinbergeite	1.745	1.746	1.753	1.748	1.733	0.015	699	86.915	3.9	5.07	5.07	0.769231	0.769231	2011	MNLMBB	Mineral. Mag.	75	2687
183	Ca0.87Na0.03Mn3.92Mg0.05Fe0.01Ni0.01Co0.01Si4.98Al0.02O14(OH)2 · H2O	santaclaraite	1.681	1.696	1.708	1.695	1.701	-0.006	330.17	38.223	1	0.78	0.86	1.28205	1.16279	1984	AMMIAY	Am. Miner.	69	200
184	Ca0.97Mn0.03Sn0.97Fe0.01Mn0.02Si3O9 · 2H2O	stokesite	1.616	1.619	1.626	1.6203	1.629	-0.009	220.07	22.782	2	1.79	1.91	1.11732	1.04712	1977	MNLMBB	Mineral. Mag.	41	411
185	Ca0.95Mn0.05SnSi3O9 · 2H2O	stokesite	1.618	1.621	1.628	1.6223	1.632	-0.01	220.07	22.855	2	1.76	1.87	1.13636	1.06952	1977	MNLMBB	Mineral. Mag.	41	411
186	Ca2Mn7Si10O28(OH)2 · 5H2O	inesite	1.616	1.641	1.652	1.6363	1.638	-0.002	723.32	76.789	5	4.85	4.99	1.03093	1.002	1939	AMMIAY	Am. Miner.	24	26
187	BaSi2O5 · 4H2O	bigcreekite	1.537	1.538	1.541	1.5387	1.529	0.01	209.5	18.843	4	4.23	4.26	0.945626	0.938967	2001	CAMIA6	Can. Mineral.	39	761
188	Y2.05Ca1.47Yb0.09Er0.08Dy0.05Ho0.03Gd0.02Lu0.02Tb0.01Tm0.01Sm0.01Nd0.01Ce0.01Si3.95Al0.05O10.18(CO3)2.937 · 4H2O	caysichite-(Y)	1.586	1.614	1.621	1.607	1.621	-0.014	449.62	45.555	4	3.29	3.35	1.21581	1.19403	1974	CAMIA6	Can. Mineral.	12	293
189	K0.68Na2.25Sr0.06Ba0.02Ca0.01Ti3.82Nb0.20Fe0.01Si1.94O13.46(OH)0.54 · 4H2O	sitinakite	1.780	1.780	1.988	1.8493	1.845	0.004	369.84	51.933	4	4.19	4.17	0.954654	0.959233	1994	MAMMAQ	Mineral. Abstr.	45	241
190	Ca3Si2O6(OH)2 · 2H2O	afwillite	1.6175	1.6209	1.6340	1.6241	1.609	0.015	214.83	22.375	2	2.36	2.55	0.847458	0.784314	1925	MNLMBB	Mineral. Mag.	20	277
191	Ca3Si2O6(OH)2 · 2H2O	afwillite	1.618	1.618	1.621	1.619	1.605	0.014	216.47	22.362	2	2.34	2.53	0.854701	0.790514	2009	CYSTE3	Crystallogr. Rep. (Transl. Kristallografiya)	54	418
192	CaCuSiO4 · H2O	stringhamite	1.709	1.717	1.729	1.7183	1.7	0.018	105.65	12.631	1	1.21	1.29	0.826446	0.775194	1976	AMMIAY	Am. Miner.	61	189
193	CaZnSiO4 · H2O	clinohedrite	1.662	1.667	1.669	1.666	1.667	-0.001	105.59	11.724	1	0.99	1.04	1.0101	0.961538	1935	XIPPAN	U.S. Geol. Surv. Prof. Pap.	180	105
194	Ba5Ca9SrFe0.4Na0.2Ce3.5La1.5Nd1.2Pr0.3Sm0.3Dy0.4Gd0.3Th0.4U0.2Y3.5Ti12.3Nb5.3(SiO4)4.6(PO4)3.1(BO3)8.9O22.2(OH)38.2F4.9 · 1.5H2O	byzantievite	1.940	1.940	1.860	1.9133	1.892	0.021	2452.7	368.744	1.5	7.31	7.63	0.205198	0.196592	2010	MNLMBB	Mineral. Mag.	74	285
195	Na2Si4O8(OH)2 · 4H2O	makatite	1.4720	1.4800	1.4870	1.48	1.469	0.011	318.25	25.472	4	4.37	4.53	0.915332	0.883002	1970	AMMIAY	Am. Miner.	55	358
196	Na16Si16O27(OH)6 · 28H2O	revdite	1.469	1.482	1.490	1.4803	1.474	0.006	1840.85	147.546	28	29.32	30.48	0.95498	0.918635	1982	AMMIAY	Am. Miner.	67	1076
197	NaHSi2O5 · H2O	grumantite	1.494	1.507	1.523	1.508	1.497	0.011	130.66	11.08	1	1.17	1.22	0.854701	0.819672	1988	AMMIAY	Am. Miner.	73	440
198	NaHSi2O4(OH)2 · 2H2O	kanemite	1.451	1.470	1.478	1.4663	1.458	0.008	185.02	14.393	3	3.17	3.22	0.946372	0.931677	1974	AMMIAY	Am. Miner.	59	210
199	NaLiSi2O5 · 2H2O	silinaite	1.515	1.516	1.518	1.5163	1.512	0.004	150.64	12.985	2	2.07	2.21	0.966184	0.904977	1991	CAMIA6	Can. Mineral.	29	359
200	Na5.8K0.42Mn0.94Fe0.04Ca0.02Ti0.75Nb0.24Si10O24(OH)4 · 4H2O	intersilite	1.536	1.545	1.553	1.5447	1.536	0.009	737.4	67.064	4.5	5.23	5.54	0.860421	0.812274	1997	AMMIAY	Am. Miner.	82	621
201	Na1.76K0.12Cs0.11Zr0.82Y0.17Nb0.02Hf0.01Si6O15 · 2.5H2O	yusupovite	1.563	1.565	1.577	1.5683	1.569	-0.001	371.76	35.279	2.5	2.41	2.5	1.03734	1	2015	AMMIAY	Am. Miner.	100	1502
202	Na4.66K1.80Y1.68Ca0.18Mg0.06Ba0.04Si15.87Al0.16O38 · 10H2O	monteregianite-(Y)	1.510	1.513	1.517	1.5133	1.507	0.006	1093.24	93.689	10	10.92	11.07	0.915751	0.903342	1978	CAMIA6	Can. Mineral.	16	561
203	Na2CaCu2Si8O20 · H2O	diegogattaite	1.598	1.627	1.632	1.619	1.618	0.001	415.47	42.919	1	1.03	0.98	0.970874	1.02041	2013	MNLMBB	Mineral. Mag.	77	3162
204	Na2Zr0.78Sn0.18Ti0.03Hf0.01Si4O11 · 2H2O	tumchaite	1.570	1.588	1.594	1.584	1.585	-0.001	279.24	27.227	2	1.98	2.14	1.0101	0.934579	2000	AMMIAY	Am. Miner.	85	1516
205	Na2Zr(Si6O15) · 3H2O	elpidite	1.5600	1.5650	1.5739	1.5663	1.561	0.005	383.88	36.299	3	3.23	3.32	0.928793	0.903614	1962	REFL8	REFL8*	II	153
206	K2.85Na1.75Ca0.76Y1.72Yb0.1Er0.06Dy0.05Th0.03Ce0.01Tm0.01Si12O30 · 3H2O	yakovenchukite-(Y)	1.520	1.525	1.538	1.5277	1.536	-0.008	772.25	68.037	3	2.11	2.61	1.4218	1.14943	2007	AMMIAY	Am. Miner.	92	1525
207	K1.24Na0.15Ba0.30Ca0.72Mg0.16Fe0.48Al3.09Si9.91O25.25(OH)3.75 · 7H2O	günterblassite	1.488	1.490	1.493	1.4903	1.482	0.008	846.65	69.285	7	7.83	7.93	0.893997	0.882724	2012	GEOOD1	Geol. Ore Deposits	54	656
208	K0.96Na0.08Ba0.16Ca0.56Mg0.58Fe0.37Si9.62Al3.32O23(OH)6.82 · 8.18H2O	hillesheimite	1.496	1.498	1.499	1.4977	1.496	0.002	847	70.358	8.18	8.36	8.53	0.978469	0.958968	2013	GEOOD1	Geol. Ore Deposits	55	549
209	K2.1Na1.08Ca0.03Cu20Al3Si29O76(OH)16 · 8H2O	ajoite	1.550	1.583	1.641	1.5913	1.6	-0.009	2195.02	216.695	8	5.79	6.03	1.38169	1.3267	1981	AMMIAY	Am. Miner.	66	201
210	Ca5Si9O23 · 9H2O	okenite	1.530	1.536	1.541	1.5357	1.534	0.002	709.24	63.435	9	9.12	9.64	0.986842	0.93361	1956	MNLMBB	Mineral. Mag.	31	5
211	Ca16NaAlt(Si23Al)O60(OH)8 · 14H2O	gyrolite	1.535	1.548	1.549	1.544	1.551	-0.007	1824.13	165.695	14	12.51	14.02	1.1191	0.998573	1953	MNLMBB	Mineral. Mag.	30	81
212	Ca0.5K0.38Mn6.15Fe1.43Mg1.42ZnSi14.82Al1.176O38(OH)8 · 5.85H2O	bannisterite	1.544	1.586	1.588	1.5727	1.59	-0.017	2231	213.323	12.2	7.71	7.94	1.58236	1.53652	1968	MNLMBB	Mineral. Mag.	36	893
213	Ca0.40K0.44Na0.05Mn6.22Fe1.45Mg1.43Zn1.01Fe3+0.18Si14.42Al1.43O38(OH)8 · 6H2O	bannisterite	1.544	1.586	1.588	1.5727	1.576	-0.003	1120.59	107.148	6	5.65	5.76	1.06195	1.04167	1968	MNLMBB	Mineral. Mag.	36	893
214	Ca0.50K0.26Na0.15Mn5.53Fe4.57Mg0.14Zn0.07Si14.38Al1.48O38(OH)8 · 5H2O	bannisterite	1.546	1.588	1.589	1.5743	1.58	-0.006	1118.5	107.259	6	5.44	5.56	1.10294	1.07914	1977	MNLMBB	Mineral. Mag.	1977	504
215	CaV4+Si4O11 · 4H2O	cavansite	1.542	1.544	1.551	1.5457	1.556	-0.01	320.4	29.193	4	3.63	3.72	1.10193	1.07527	1973	AMMIAY	Am. Miner.	58	405
216	CaV4+Si4O11 · 4H2O	cavansite	1.542	1.544	1.551	1.5457	1.553	-0.007	321.02	29.249	4	3.74	3.76	1.06952	1.06383	1973	AMMIAY	Am. Miner.	58	405
217	CaV4+Si4O11 · 4H2O	pentagonite	1.533	1.544	1.547	1.5413	1.545	-0.004	327.32	29.586	4	3.87	3.96	1.03359	1.0101	1973	AMMIAY	Am. Miner.	58	405
218	CaZrSi6O15 · 2H2O	armstrongite	1.563	1.569	1.573	1.5683	1.584	-0.016	365.9	34.722	2	1.77	1.89	1.12994	1.0582	1974	AMMIAY	Am. Miner.	59	208
219	Ca2SnAl2Si6O18(OH)2 · 2H2O	eakerite	1.584	1.586	1.600	1.59	1.594	-0.004	444.45	43.778	2	1.78	1.78	1.1236	1.1236	1971	AMMIAY	Am. Miner.	56	637
220	Ba0.98Ca0.02Si2O5 · 3H2O	krauskopfite	1.574	1.587	1.599	1.5867	1.573	0.014	175.51	17.191	3	3.27	3.3	0.917431	0.909091	1965	AMMIAY	Am. Miner.	50	315
221	BaCa4Si16O36(OH)2 · 10H2O	macdonaldite	1.518	1.524	1.530	1.524	1.511	0.013	1087.2	95.116	10	11.55	11.99	0.865801	0.834028	1963	AMMIAY	Am. Miner.	50	315
222	Ba0.98Sr0.01Ca3.90Mg0.02Si16O36.0(OH)2 · 10H2O	macdonaldite	1.518	1.524	1.530	1.524	1.515	0.009	1081.4	94.609	10	11.36	11.79	0.880282	0.848176	1963	AMMIAY	Am. Miner.	50	315
223	(Cs3.91K0.04)Na2.05(Zr2.76Ti0.11Fe3+0.06Sn0.06)(Si18O44.92) · 2H2O	zeravshanite	1.582	1.598	1.603	1.5943	1.586	0.008	1090.97	108.245	2	3.04	3.09	0.657895	0.647249	2004	NDMIDF	Nov. Dannye Miner.	39	21
224	Na2.58K0.06Ca0.03Nb2.97Ti0.03Si4O17 · 9H2O	laurentianite	1.612	1.612	1.604	1.6093	1.62	-0.011	599	60.921	9	8.31	8.22	1.08303	1.09489	2012	CAMIA6	Can. Mineral.	50	1265
225	Na4.21Ca0.46Ba1.28Sr0.5K0.3Mn1.43Ti4.14Nb1.43Fe3+0.06Si8O32(OH)2.94F1.06 · 6H2O	nechelyustovite	1.700	1.710	1.734	1.7147	1.713	0.002	915.85	108.952	6	6.12	5.56	0.980392	1.07914	2009	MNLMBB	Mineral. Mag.	73	753
226	K0.53Ba0.28Sr0.03K0.72Cs0.07Na0.72Ca0.17Fe5.32Fe3+4.30Mn5.97Ca0.7Zn0.15Mg0.07Nb2.9Ti0.93Si19.61Al0.39O77H16.08F0.38	veblenite	1.676	1.688	1.692	1.6853	1.696	-0.011	1720.14	196.429	3	2.74	2.71	1.09489	1.10701	2013	MNLMBB	Mineral. Mag.	77	2955
227	Ca2Si2O5(OH)2 · H2O	suolunite	1.610	1.620	1.623	1.6177	1.603	0.015	164.64	16.972	1	1.28	1.22	0.78125	0.819672	1967	AMMIAY	Am. Miner.	52	560
228	Ca0.98K0.02Mg0.01Na0.01Al1.94Fe3+0.03Ti0.02Si2O7(OH)2 · H2O	lawsonite	1.6650	1.6690	1.6840	1.6727	1.672	0.001	168.93	18.941	1	1.01	0.95	0.990099	1.05263	1960	AJSCAP	Amer. J. Sci.	258	689
229	Ca2(Mn2+0.87Ca0.12)(Fe0.94Al0.04Mg0.04)Si4O12(OH) · 2H2O	hubeite	1.667	1.679	1.690	1.6787	1.683	-0.004	300.5	33.988	2	1.86	1.95	1.07527	1.02564	2002	MRECA7	Mineral. Rec.	33	465
230	Ca2Mn0.49Mg0.06Mn3+1.85Cu0.152Si2.86V5+0.07S0.07O10(OH)3.16 · 0.84H2O	orientite	1.765	1.79	1.81	1.7883	1.798	-0.01	265.5	34.726	0.84	0.51	0.59	1.64706	1.42373	1979	MNLMBB	Mineral. Mag.	43	325
231	Ca7.84Mn0.28Mn3+8.25Mg0.25Cu0.56Si11.27V5+0.23S0.27O42(OH)10 · 4H2O	orientite	1.765	1.79	1.81	1.7883	1.801	-0.013	1048.36	137.119	4	2.45	2.73	1.63265	1.4652	1986	AMMIAY	Am. Miner.	71	176
232	Ca2Mn3+2Si4O11(OH)4 · 2H2O	ruizite	1.663	1.715	1.734	1.704	1.702	0.002	334.56	39.221	2	2.07	2	0.966184	1	1977	MNLMBB	Mineral. Mag.	41	429
233	CaZn2Si2O7 · H2O	junitoite	1.656	1.664	1.672	1.664	1.663	0.001	169.16	18.727	1	1.02	1.16	0.980392	0.862069	1976	AMMIAY	Am. Miner.	61	1255
234	Zn4Si2O7(OH)2 · H2O	hemimorphite	1.6136	1.6170	1.6360	1.6222	1.62	0.002	229.26	23.804	1	1.06	1.1	0.943396	0.909091	1959	OAWCAY	Sitzungsber. - Oesterr. Akad. Wiss., Math.-Naturwiss. Kl., Abt. 2b	37	379
235	Zn4Si2O7(OH)2 · H2O	hemimorphite	1.611	1.619	1.630	1.62	1.619	0.001	229.68	23.765	1	1.04	1.07	0.961538	0.934579	1989	JCPDS	Joint Committee on Powder Diffraction Standards	5	555
236	Sr0.97Ca0.03Mg0.02Al1.97Ti0.04Fe0.02Si2O7(OH)2 · H2O	itoigawaite	1.664	1.674	1.688	1.6753	1.657	0.018	178.28	20.067	1	1.37	1.32	0.729927	0.757576	1999	MNLMBB	Mineral. Mag.	63	909
237	(Ba0.56Sr0.22K0.16Ca0.03)(Ba0.14Sr0.06K0.06)(Ti1.35Nb0.63Al0.02)(Na2.55Mn0.57Ca0.11Fe0.03)(Ti0.74)Si4O16(OH)1.41F0.59 · 4H2O	kazanskyite	1.695	1.703	1.733	1.7103	1.693	0.017	488.8	57.805	4	4.95	5.16	0.808081	0.775194	2012	MNLMBB	Mineral. Mag.	76	473
238	Ba0.61Sr0.2K0.13Ca0.26Na2.22Mn0.68Fe0.04Ti2.09Nb0.76Mg0.01Al0.01Si4O16(OH)1.26F0.74 · 2H2O	saamite	1.760	1.770	1.795	1.775	1.757	0.018	418.15	53.803	2	2.85	2.58	0.701754	0.775194	2015	CAMIA6	Can. Mineral.	52	745
239	Ba0.868Sr0.067Na0.021Ca0.025Mn3+2.016Fe3+0.011Ti0.001Alt0.015Si1.983O7(OH)2 · H2O	noélbensonite	1.82	1.835	1.85	1.835	1.846	-0.011	196.4	27.137	1	0.76	0.85	1.31579	1.17647	1996	MNLMBB	Mineral. Mag.	60	369
240	NaH2PO4 · H2O		1.4556	1.4852	1.4873	1.476	1.47	0.006	111.02	8.818	1	1.08	1.13	0.925926	0.884956	2002	JPCRBU	J. Phys. Chem. Ref. Data	31	931
241	NaH2PO4 · H2O		1.4557	1.4852	1.4873	1.4761	1.469	0.007	111.1	8.825	1	1.09	1.13	0.917431	0.884956	1943	AMMIAY	Am. Miner.	28	448
242	Na2HPO4 · 2H2O	dorfmanite	1.450	1.461	1.477	1.4627	1.46	0.003	143.6	11.082	2	2.04	2.19	0.980392	0.913242	1943	AMMIAY	Am. Miner.	28	448
243	Na2HPO4 · 2H2O	dorfmanite	1.454	1.461	1.471	1.462	1.46	0.002	143.6	11.066	2	2.03	2.18	0.985222	0.917431	1981	AMMIAY	Am. Miner.	66	217
244	NaH2PO4 · 2H2O		1.4400	1.4628	1.4814	1.4614	1.453	0.008	136.8	10.528	2	2.13	2.17	0.938967	0.921659	2002	JPCRBU	J. Phys. Chem. Ref. Data	31	931
245	Na2H2P2O7 · 6H2O		1.4599	1.4645	1.4649	1.4631	1.46	0.003	290.37	22.43	6	6.11	6.2	0.981997	0.967742	1943	AMMIAY	Am. Miner.	28	448
246	Na2HPO4 · 7H2O		1.4412	1.4424	1.4526	1.4454	1.432	0.013	264.14	19.615	7	7.37	7.46	0.949796	0.938338	1943	AMMIAY	Am. Miner.	28	448
247	Na2HPO4 · 7H2O		1.4411	1.4423	1.4525	1.4453	1.432	0.013	264.6	19.645	7	7.39	7.48	0.947226	0.935829	2002	JPCRBU	J. Phys. Chem. Ref. Data	31	931
248	Na2HPO4 · 8H2O	catalanoite	1.443	1.457	1.458	1.4527	1.45	0.003	274.87	20.749	8	8.08	8.17	0.990099	0.979192	2004	CAMIA6	Can. Mineral.	42	1906
249	Na2HPO4 · 12H2O		1.4321	1.4361	1.4373	1.4352	1.422	0.013	386.3	28.019	12	12.56	12.65	0.955414	0.948617	1943	AMMIAY	Am. Miner.	28	448
250	K3Al5(PO4)2(PO3 OH)6 · 12H2O	francoanellite	1.510	1.510	1.515	1.5117	1.515	-0.003	896.68	76.593	12	11.64	11.7	1.03093	1.02564	1998	ZENBAX	Z. Naturforsch., B	53	711
251	K2.6Na0.4Al4.55Fe0.45(PO4)2(PO3OH)6 · 12H2O	francoanellite	1.510	1.510	1.515	1.5117	1.515	-0.003	906.63	77.443	12	11.64	11.67	1.03093	1.02828	1976	AMMIAY	Am. Miner.	61	1054
252	K2.73Na0.09Ca0.1Al4.75Fe0.33(PO4)2(PO3OH)6 · 18H2O	taranakite	1.508	1.508	1.502	1.506	1.504	0.002	1038.2	87.694	18	18.23	18.07	0.987383	0.996126	1991	AMMIAY	Am. Miner.	76	1722
253	MgPO3OH · 3H2O	newberyite	1.514	1.517	1.533	1.5213	1.52	0.001	136.39	11.871	3	3.02	3.01	0.993377	0.996678	1921	BUGMAF	Geol. Soc. Amer. Bull.	679	115
254	CaHPO4 · 2H2O	brushite	1.5409	1.5462	1.5519	1.5463	1.544	0.002	123.23	11.242	2	2.04	2	0.980392	1	2008	JCRGAE	J. Cryst. Growth	310	617
255	Ca3Be2(PO4)2(PO3OH)2 · 4H2O	fransoletite	1.560	1.566	1.586	1.5707	1.576	-0.005	388.4	37.009	4	3.75	3.8	1.06667	1.05263	1983	BUFCAE	Bull. Soc. Fr. Miner. Crist.	106	499
256	Ca3Be2(PO4)2(PO3OH)2 · 4H2O	parafransoletite	1.562	1.564	1.588	1.5713	1.581	-0.01	384.6	36.689	4	3.55	3.61	1.12676	1.10803	1992	AMMIAY	Am. Miner.	77	848
257	Ca2ZnBeP3O11OH · 4H2O	ehrleite	1.556	1.560	1.580	1.5653	1.578	-0.013	320.18	30.224	4	3.53	3.54	1.13314	1.12994	1985	CAMIA6	Can. Mineral.	23	507
258	Mn5(PO4)2(PO3OH)2 · 4H2O	huréaulite	1.647	1.654	1.660	1.6537	1.667	-0.013	380.04	41.429	4	3.43	3.47	1.16618	1.15274	1997	REF-G	REF-G*	8	739
259	Mn3.97Fe0.60Ca0.10Mg0.01(PO4)2(PO3OH)2 · 4H2O	huréaulite	1.648	1.659	1.662	1.6563	1.666	-0.01	374.7	41.011	4	3.57	3.62	1.12045	1.10497	1985	AMMIAY	Am. Miner.	70	395
260	Mn4.61Fe0.02Ca0.01Mg0.01(PO4)2(PO3OH)2 · 4H2O	huréaulite	1.640	1.649	1.655	1.648	1.667	-0.019	372.37	40.246	4	3.17	3.21	1.26183	1.24611	1985	AMMIAY	Am. Miner.	70	395
261	Mn0.64Fe0.38Mg0.02Al(PO3OH)2(OH)0.44F0.42 · 6H2O	sinkankasite	1.511	1.529	1.544	1.528	1.526	0.002	295.35	26.037	6	6.05	6.05	0.991736	0.991736	1984	AMMIAY	Am. Miner.	69	380
262	Al3PO4PO3OH(OH)4 · 4H2O	afmite	1.554	1.558	1.566	1.5593	1.562	-0.003	285.8	26.692	4	3.9	3.86	1.02564	1.03627	2011	EJMIER	Eur. J. Mineral.	23	269
263	Na1.06K0.92Cs0.03Rb0.02Be0.4Al0.14Ca0.12Mn0.10Fe0.05Mg0.03Ba0.01Zr1.89Hf0.04P3.94Si0.06O15.80F0.13 · 2H2O	selwynite	1.624	1.624	1.636	1.628	1.639	-0.011	369.95	38.767	2	1.53	1.63	1.30719	1.22699	1995	CAMIA6	Can. Mineral.	33	55
264	Na0.6Ca1.96Mg2.59Mn0.05Fe1.98Fe3+1.39Y0.02Yb0.01S0.01P5.98O24 · 2H2O	tassieite	1.712	1.713	1.722	1.7157	1.727	-0.011	460.52	54.859	2	1.41	1.23	1.41844	1.62602	2007	CAMIA6	Can. Mineral.	45	293
265	(Na1.96K0.03)Ca(Cu2+1.85Mg0.04)P4.04O14 · 10H2O	wooldridgeite	1.508	1.511	1.517	1.512	1.512	0	540.1	46.165	10	10	10.2	1	0.980392	1999	MNLMBB	Mineral. Mag.	63	13
266	Na1.59Mn0.06Fe0.09Hf0.02Cs0.10K0.32Ca0.08Zr1.69Mg0.06Be0.58Li0.34Al0.06P4Si0.01O16 · 1.5H2O	gainesite	1.618	1.618	1.630	1.622	1.616	0.006	369.1	38.312	1.5	1.95	2.02	0.769231	0.742574	1994	CAMIA6	Can. Mineral.	32	839
267	NaSr0.77Ba0.20Ca0.03PO4 · 9H2O	nastrophite	1.502	1.502	1.502	1.502	1.488	0.014	294.31	24.662	9	9.46	9.49	0.951374	0.948367	1982	AMMIAY	Am. Miner.	67	845
268	Na5P3O10 · 6H2O		1.449	1.450	1.482	1.4603	1.453	0.007	387.2	29.729	6	6.31	6.72	0.950872	0.892857	1943	AMMIAY	Am. Miner.	28	448
269	Na4P2O7 · 10H2O		1.4499	1.4525	1.4604	1.4543	1.441	0.013	407.5	30.871	10	10.59	10.77	0.944287	0.928505	1943	AMMIAY	Am. Miner.	28	448
270	Mg3(PO4)2 · 8H2O	bobierrite	1.501	1.513	1.536	1.5167	1.525	-0.008	316.82	27.328	8	7.71	7.68	1.03761	1.04167	1963	AMMIAY	Am. Miner.	48	635
271	Mg3(PO4)2 · 22H2O	cattiite	1.459	1.470	1.470	1.4663	1.456	0.01	666.3	51.833	22	22.76	22.74	0.966608	0.967458	2004	CAMIA6	Can. Mineral.	42	220
272	Mg1.70Fe1.19Fe3+0.11(PO4)2(OH)0.11 · 7.89H2O	barićite	1.554	1.564	1.595	1.571	1.586	-0.015	305.1	29.088	8	7.49	7.48	1.06809	1.06952	1976	CAMIA6	Can. Mineral.	14	403
273	Mg0.97Fe0.01ZnO0.01Zr0.99Hf0.01(PO4)2 · 4H2O	zigrasite	1.597	1.622	1.635	1.618	1.614	0.004	236.39	24.381	4	4.12	4.19	0.970874	0.954654	2009	MNLMBB	Mineral. Mag.	73	415
274	Ca1.91Na0.01Zn0.64Mg0.36(PO4)2 · 2H2O	hillite	1.635	1.650	1.667	1.6507	1.647	0.004	186.05	20.19	2	2.08	2.02	0.961538	0.990099	2004	CAMIA6	Can. Mineral.	42	925
275	Ca2.09Mg0.93(PO4)2 · 2H2O	collinsite	1.632	1.642	1.657	1.6437	1.642	0.002	185.66	19.934	2	2.04	1.97	0.980392	1.01523	1974	MNLMBB	Mineral. Mag.	39	577
276	Ca0.92Mn0.08Zn1.98Fe0.02(PO4)2 · 2H2O	parascholzite	1.587	1.588	1.603	1.5927	1.606	-0.013	212.21	20.997	2	1.68	1.8	1.19048	1.11111	1981	AMMIAY	Am. Miner.	66	843
277	Ca2Mn0.77Fe0.23(PO4)2 · 2H2O	fairfieldite	1.636	1.644	1.654	1.6447	1.66	-0.015	193.23	20.779	2	1.67	1.61	1.1976	1.24224	1955	AMMIAY	Am. Miner.	40	828
278	Ca1.93Mn3+2.92Fe3+0.07P3O14 · 3H2O	robertsite	1.775	1.82	1.82	1.805	1.795	0.01	317.52	42.37	3	3.34	3.33	0.898204	0.900901	1974	AMMIAY	Am. Miner.	59	48
279	Ca2Mn3+2.97Fe3+0.01P3O14 · 3H2O	pararobertsite	1.79	1.81	1.83	1.81	1.798	0.012	316.25	42.451	3	3.41	3.39	0.879765	0.884956	1989	CAMIA6	Can. Mineral.	27	451
280	Ca2Fe(PO4)2 · 4H2O	anapaite	1.602	1.613	1.649	1.6213	1.62	0.001	235.11	24.378	4	4.04	3.86	0.990099	1.03627	1921	BUGMAF	Geol. Soc. Amer. Bull.	679	39
281	Ca2Fe0.89Mg0.11(PO4)2 · 2H2O	messelite	1.653	1.659	1.676	1.6627	1.66	0.003	191.32	21.139	2	2.06	1.99	0.970874	1.00503	1955	AMMIAY	Am. Miner.	40	828
282	CaZn2(PO4)2 · 2H2O	scholzite	1.585	1.587	1.599	1.5903	1.606	-0.016	211.96	20.89	2	1.62	1.76	1.23457	1.13636	1981	AMMIAY	Am. Miner.	66	843
283	CaZn1.72Mg0.09Mn0.08Fe0.02(PO4)2 · 2H2O	scholzite	1.585	1.587	1.599	1.5903	1.597	-0.007	211.86	20.88	2	1.84	1.9	1.08696	1.05263	1981	AMMIAY	Am. Miner.	66	843
284	CaZn2(PO4)2 · 2H2O	scholzite	1.585	1.587	1.599	1.5903	1.603	-0.013	213.19	21.011	2	1.7	1.84	1.17647	1.08696	1981	AMMIAY	Am. Miner.	66	843
285	Ca2Zn0.62Mg0.38(PO4)2 · 2H2O	hillite	1.635	1.650	1.669	1.6513	1.658	-0.007	186.05	20.21	2	1.85	1.78	1.08108	1.1236	2003	CAMIA6	Can. Mineral.	41	981
286	ScPO4 · 2H2O	kolbeckite	1.572	1.590	1.601	1.5877	1.584	0.004	123.27	12.094	2	2.05	2.06	0.97561	0.970874	1982	MNLMBB	Mineral. Mag.	46	493
287	CrPO4 · 6H2O		1.568	1.592	1.599	1.5863	1.582	0.004	197.1	19.294	6	6.09	6.09	0.985222	0.985222	1978	RFNBSM	RFNBSM*	15	27
288	Mn2Fe(PO4)2 · 3H2O	correianevesite	1.658	1.664	1.685	1.669	1.671	-0.002	213.41	23.801	3	2.96	2.98	1.01351	1.00671	1954	NJMMAW	Neues Jahrb. Mineral., Monatsh.	87	185
289	(Mn0.93Fe0.07)3(PO4)2 · 7H2O	switzerite	1.560	1.574	1.580	1.5713	1.582	-0.011	314.16	29.97	7	6.65	6.67	1.05263	1.04948	1986	AMMIAY	Am. Miner.	71	1221
290	Fe3(PO4)2 · 8H2O	vivianite	1.5788	1.6024	1.6294	1.6035	1.617	-0.013	309.78	31.209	8	7.55	7.55	1.0596	1.0596	1993	MIPEE9	Mineral. Petrol.	47	193
291	Fe2.381Mn0.069Ca0.013Mg0.078Fe3+0.678(PO4)2(OH)0.116 · 6.88H2O	vivianite	1.63	1.64	1.65	1.64	1.643	-0.003	311.5	33.258	6.884	6.76	6.77	1.01834	1.01684	1997	CAMIA6	Can. Mineral.	35	713
292	Fe2.06Mn0.94(PO4)2 · 3H2O	phosphoferrite	1.663	1.674	1.699	1.6787	1.696	-0.017	204.95	23.181	3	2.6	2.62	1.15385	1.14504	1954	NJMMAW	Neues Jahrb. Mineral., Monatsh.	87	185
293	Zn3(PO4)2 · 4H2O	hopeite	1.589	1.598	1.599	1.5953	1.604	-0.009	243.02	24.153	4	3.76	3.77	1.06383	1.06101	2004	CEUJED	Chemistry-A European Journal	10	2795
294	Zn3(PO4)2 · 4H2O	hopeite	1.589	1.598	1.599	1.5953	1.602	-0.007	243.85	24.235	4	3.81	3.82	1.04987	1.04712	2004	CEUJED	Chemistry-A European Journal	10	2795
295	Zn2.24Mg0.42Fe0.17(PO4)2 · 4H2O	parahopeite	1.614	1.625	1.637	1.6253	1.624	0.001	229.23	23.92	4	4.03	4.04	0.992556	0.990099	1974	MNLMBB	Mineral. Mag.	39	684
296	Zn1.91Fe0.77Mn0.3(PO4)2 · 4H2O	phosphophyllite	1.595	1.614	1.616	1.6083	1.624	-0.016	238.28	24.195	4	3.57	3.6	1.12045	1.11111	1935	NJMABV	N. Jb. Mineral. Geol. Palaeontol. Beiheft, Abt. A	70A	203
297	AlPO4 · 2H2O	variscite	1.562	1.583	1.590	1.5783	1.591	-0.013	101.22	9.774	2	1.86	1.84	1.07527	1.08696	1925	AMMIAY	Am. Miner.	10	23
298	AlPO4 · 2H2O	metavariscite	1.551	1.558	1.582	1.5637	1.576	-0.012	104.12	9.8	2	1.85	1.84	1.08108	1.08696	1925	AMMIAY	Am. Miner.	10	23
299	Fe3+0.99Ti0.01P0.99Si0.01O4 · 2H2O	strengite	1.707	1.719	1.741	1.7223	1.742	-0.02	108.97	13.099	2	1.76	1.76	1.13636	1.13636	1951	REF-P2	REF-P2*	II	756
300	Fe3+0.99Ti0.01P0.99Si0.01O4 · 2H2O	phosphosiderite	1.692	1.725	1.738	1.7183	1.711	0.007	114.06	13.637	2	2.1	2.09	0.952381	0.956938	1951	REF-P2	REF-P2*	II	769
301	[Na0.86K0.09Ca0.05(H2O)1.90 (H3O)0.60]Fe3+6.63Al1.32Cu0.04Mg0.01(P0.96V0.02O4)6(OH)7 · 4H2O	meurigite-Na	1.740	1.759	1.763	1.754	1.757	-0.003	696.47	87.272	5.9	5.6	5.57	1.05357	1.05925	2009	AMMIAY	Am. Miner.	94	720
302	Na0.94Mg0.88Fe0.11Mn0.01Al4.84Fe3+0.13P4O16(OH)6 · 2H2O	matioliite	1.597	1.627	1.632	1.6187	1.628	-0.009	396.97	40.986	2	1.57	1.46	1.27389	1.36986	2006	AMMIAY	Am. Miner.	91	1932
303	Na0.65Ca0.31K0.03Al3(PO4)2(OH)4 · 2H2O	wardite	1.590	1.590	1.599	1.593	1.609	-0.016	235.24	23.288	2	1.56	1.49	1.28205	1.34228	1930	AMMIAY	Am. Miner.	15	307
304	Na0.92Ca0.06Fe3+3(PO4)2(OH)4 · 2H2O	cyrilovite	1.802	1.802	1.775	1.793	1.802	-0.009	258.24	33.968	2	1.75	1.7	1.14286	1.17647	1957	AMMIAY	Am. Miner.	42	204
305	Na0.85Ca0.02Mn0.74Fe0.12Mg0.02Zn0.02Ti0.01Fe3+4.47Al0.53P4O16(OH)6 · 2H2O	gayite	1.787	1.792	1.806	1.795	1.793	0.002	436.27	57.524	2	2.12	2.08	0.943396	0.961538	2010	AMMIAY	Am. Miner.	95	386
306	(Na0.72Ca0.05Mn0.04)(Fe3+0.72Mg0.01)Mg2Fe3+2(PO3.77OH0.23)4(OH)2 · 8H2O	jahnsite-(NaFeMg)	1.632	1.669	1.671	1.6573	1.652	0.005	495.9	54.358	8	8.27	8.22	0.967352	0.973236	2008	AMMIAY	Am. Miner.	93	940
307	Na0.96Fe0.55Mg0.33Fe3+0.10Mn0.02Al5P4O16(OH)6 · 2H2O	burangaite	1.611	1.635	1.643	1.6297	1.65	-0.02	397.77	41.791	2	1.05	0.94	1.90476	2.12766	1977	GSFBBJ	Bull. Geol. Soc. Finl.	49	33
308	Na0.71Fe3+3.83Mg0.97Mn3+0.19P4O16(OH)2.71 · 5.29H2O	angarfite	1.688	1.696	1.708	1.6973	1.699	-0.002	470.54	54.652	5.291	5.22	5.17	1.0136	1.0234	2012	CAMIA6	Can. Mineral.	50	781
309	NaCs0.80Li0.30K0.05Be0.86Mg0.02Zr1.90Hf0.09Zn0.05P4O15.80F0.20 · 1.23H2O	mccrillisite	1.634	1.634	1.645	1.6377	1.631	0.007	373.3	39.712	1.23	1.51	1.57	0.81457	0.783439	1994	CAMIA6	Can. Mineral.	32	839
310	Na3.25PO4(OH)0.25 · 12H2O		1.4458	1.4458	1.4524	1.448	1.437	0.011	387.83	28.97	12	12.46	12.61	0.963082	0.951626	1987	BUFCAE	Bull. Soc. Fr. Miner. Crist.	10	76
311	Na3.25PO4(OH)0.25 · 12H2O		1.4458	1.4458	1.4524	1.448	1.437	0.011	387.34	28.934	12	12.44	12.59	0.96463	0.953137	1931	REF-W1	REF-W1*	2	269
312	K0.82Ca0.05Na0.03Al2(PO4)2[F0.55(OH)0.45] · 4H2O	minyulite	1.531	1.534	1.538	1.5343	1.546	-0.012	251.09	22.402	4	3.68	3.68	1.08696	1.08696	1951	REF-P2	REF-P2*	II	970
313	K0.93Na0.04Fe3+2.05Mn0.03Al0.02(PO4)2(OH) · 2H2O	leucophosphite	1.707	1.721	1.739	1.7223	1.721	0.001	224.86	27.029	2	2.03	2.02	0.985222	0.990099	1957	AMMIAY	Am. Miner.	42	214
314	[K0.91Na0.03(H2O)2.56]Fe3+7.52Al0.17Cu0.03[P5.48(CO3)0.21O21.92](OH)7.2 · 5.23H2O	meurigite-K	1.780	1.785	1.800	1.7883	1.781	0.007	709.07	92.742	6.5	7.25	7.27	0.896552	0.894085	2007	AMMIAY	Am. Miner.	92	1518
315	Be2PO4(OH) · 4H2O	moraesite	1.462	1.482	1.490	1.478	1.477	0.001	185.75	14.815	4	4.01	4.01	0.997506	0.997506	1953	AMMIAY	Am. Miner.	38	1126
316	MgAl2[(PO4)(OH)]2 · 8H2O	gordonite	1.534	1.543	1.558	1.545	1.545	0	334.48	30.438	8	7.99	7.96	1.00125	1.00503	1930	AMMIAY	Am. Miner.	15	307
317	Mg2PO4(OH) · 3H2O	kovdorskite	1.528	1.542	1.549	1.5397	1.545	-0.005	154.78	13.947	3	2.91	2.89	1.03093	1.03806	1981	AMMIAY	Am. Miner.	66	437
318	Mg1.45Fe3+1.39Mn0.14Al0.01Fe0.01(OH)1.43(PO4)2 · 1.5H2O	garyansellite	1.733	1.757	1.761	1.7503	1.75	0	191.59	23.895	1.5	1.49	1.47	1.00671	1.02041	1984	AMMIAY	Am. Miner.	69	207
319	Ca3.98Mn0.02Al2(PO4)2(OH)0.77F7.23 · 5H2O	galliskiite	1.493	1.495	1.520	1.5027	1.512	-0.009	401.45	33.685	5	4.59	4.5	1.08932	1.11111	2010	AMMIAY	Am. Miner.	95	392
320	CaPO3F · 2H2O		1.485	1.495	1.512	1.4973	1.501	-0.004	124.97	10.374	2	1.95	1.98	1.02564	1.0101	1978	RFNBSM	RFNBSM*	15	24
321	CaBe3(PO4)2(OH)2 · 4H2O	weinebeneite	1.520	1.520	1.530	1.5233	1.532	-0.009	276.71	24.178	4	3.72	3.69	1.07527	1.08401	1992	EJMIER	Eur. J. Mineral.	4	1275
322	Ca1.13Na0.95Fe3+3.83Mn0.03Al0.02Mg0.01P4O16(OH)3 · 5H2O	kapundaite	1.717	1.737	1.790	1.748	1.738	0.01	451.2	56.103	5	5.5	5.42	0.909091	0.922509	2010	AMMIAY	Am. Miner.	95	754
323	Ca0.75K0.09Na0.05Ba0.01Sr0.01[V4+3.27Al0.49P2O10.23(OH)5.77] · 12H2O	phosphovanadylite-Ca	1.559	1.559	1.559	1.559	1.544	0.015	613.67	57.28	12	13.05	13.09	0.91954	0.91673	2013	AMMIAY	Am. Miner.	98	439
324	CaMgAl(PO4)2 (OH) · 4H2O	overite	1.568	1.574	1.580	1.574	1.575	-0.001	245.19	23.499	4	3.99	3.93	1.00251	1.01781	1977	AMMIAY	Am. Miner.	62	692
325	Ca2.02Mg0.94Mn2.04Fe1.99Fe3+1.99Zn4.05P8O32(OH)4 · 14H2O	falsterite	1.575	1.600	1.610	1.595	1.617	-0.022	1043.1	103.611	14	11.37	11.49	1.23131	1.21845	2012	AMMIAY	Am. Miner.	97	496
326	Ca1.03MgFe3+0.89Al0.05(PO4)2(OH)0.89 · 3.84H2O	segelerite	1.618	1.635	1.650	1.6343	1.618	0.016	253.92	26.873	3.84	4.28	4.24	0.897196	0.90566	1974	AMMIAY	Am. Miner.	59	48
327	Ca3.96Mn0.83Mg0.06Fe3+2.18Al1.86(PO4)6(OH)4 · 12H2O	zodacite	1.598	1.601	1.602	1.6003	1.601	-0.001	772.79	77.444	12	11.91	11.81	1.00756	1.01609	1988	AMMIAY	Am. Miner.	73	1179
328	Ca2Mn2.3Mg3.5Fe3+3.3Al0.8(OH)4.1P8O32 · 15.8H2O	jahnsite-(CaMnMg)	1.640	1.658	1.670	1.656	1.642	0.014	994.36	108.778	15.8	17.32	17.22	0.91224	0.917538	1974	AMMIAY	Am. Miner.	59	48
329	CaAlPO4(OH)2 · H2O	foggite	1.610	1.610	1.611	1.6103	1.611	-0.001	256.48	26.128	2	1.98	1.76	1.0101	1.13636	1975	AMMIAY	Am. Miner.	60	957
330	CaFe2Fe3+10(PO4)8(OH)12 · 4H2O	dufrénite	1.837	1.845	1.895	1.859	1.854	0.005	850.86	120.764	4	4.5	4.44	0.888889	0.900901	1949	AMMIAY	Am. Miner.	34	513
331	Ca0.85Zn0.15MnFe3+(PO4)2(OH) · 4H2O	wilhelmvierlingite	1.637	1.664	1.692	1.6643	1.681	-0.017	250.18	27.71	4	3.54	3.52	1.12994	1.13636	1983	AFSLAO	Aufschluss	34	267
332	Mn0.54Na0.04Ca0.03Li0.01Fe3+5.65(OH)5P4O16 · 6H2O	beraunite	1.768	1.774	1.783	1.775	1.772	0.003	513.78	66.107	5	5.2	5.19	0.961538	0.963391	1989	CAMIA6	Can. Mineral.	27	441
333	Mn7.2Mg1.2Ca0.5Fe3+2.7Mn3+0.5P8O32(OH)3 · 9H2O	landesite	1.720	1.728	1.735	1.7277	1.725	0.003	822.96	99.632	9	9.26	9.36	0.971922	0.961538	1951	REF-P2	REF-P2*	II	729
334	Mn0.82Mg0.12Ca0.06Mn3+1.75Fe3+0.18Al0.02(PO4)2(OH)2 · 4H2O	bermanite	1.687	1.725	1.748	1.72	1.719	0.001	264.95	31.748	4	4.02	4.02	0.995025	0.995025	1968	AMMIAY	Am. Miner.	53	416
335	MnAlPO4(OH)2 · H2O	eosphorite	1.638	1.660	1.657	1.6517	1.66	-0.008	122.11	13.271	1	0.88	0.88	1.13636	1.13636	1950	AMMIAY	Am. Miner.	35	793
336	Mn0.666Fe0.333AlPO4(OH)2 · H2O	eosphorite	1.638	1.660	1.657	1.6517	1.648	0.004	124.65	13.547	1	1.06	1.05	0.943396	0.952381	1950	AMMIAY	Am. Miner.	35	793
337	Mn0.55Fe0.30Mg0.09Ca0.05Fe3+2(PO4)2(OH)2 · 4H2O	earlshannonite	1.696	1.745	1.765	1.7353	1.738	-0.003	260.73	31.888	4	3.93	3.93	1.01781	1.01781	1984	CAMIA6	Can. Mineral.	22	471
338	MnFe3+2(PO4)2(OH)2 · 8H2O	stewartite	1.63	1.658	1.66	1.6493	1.65	-0.001	357.6	38.728	8	7.96	7.96	1.00503	1.00503	1951	REF-P2	REF-P2*	II	730
339	Mn0.65Fe0.34Mg0.05Al2(PO4)2(OH)2 · 8H2O	kastningite	1.566	1.574	1.582	1.574	1.573	0.001	333.08	31.922	8	8.04	8.02	0.995025	0.997506	1999	AMMIAY	Am. Miner.	84	1465
340	Fe2.98Al0.03(PO4)2(OH)3 · 5H2O	allanpringite	1.662	1.675	1.747	1.6947	1.694	0.001	320.42	37.077	5	5.04	5.03	0.992063	0.994036	2006	EJMIER	Eur. J. Mineral.	18	793
341	FeAl2(PO4)2(OH)2· 8H2O	paravauxite	1.554	1.558	1.573	1.5617	1.567	-0.005	334.43	31.364	8	7.79	7.77	1.02696	1.0296	1922	SCIEAS	Science	56	50
342	FeAl2(PO4)2 (OH)2· 6H2O	vauxite	1.551	1.555	1.562	1.556	1.561	-0.005	303.9	28.214	6	5.81	5.79	1.0327	1.03627	1922	SCIEAS	Science	56	50
343	Fe0.89Mn0.11AlPO4(OH)2 · H2O	childrenite	1.643	1.678	1.684	1.6683	1.667	0.001	120.4	13.415	1	1.02	1.01	0.980392	0.990099	1951	REF-P2	REF-P2*	II	896
344	Fe0.59Mn0.27Fe3+2(PO4)2(OH)2 · 4H2O	whitmoreite	1.676	1.725	1.745	1.7153	1.728	-0.013	265.58	31.623	4	3.62	3.62	1.10497	1.10497	1974	AMMIAY	Am. Miner.	59	900
345	(Cu2+2Zn0.02V3+0.98Fe3+0.01Al1.15)Al8P7.90O32[F8.37(OH)1.63] · 21.65H2O	nevadaite	1.540	1.548	1.553	1.547	1.553	-0.006	1142.8	104.379	21.65	20.93	20.79	1.0344	1.04137	2004	CAMIA6	Can. Mineral.	42	741
346	Cu0.70(Cd1.68Ca0.32)Al3(PO4)4F2[(H2O)1.60F0.40] · 10H2O	goldquarryite	1.570	1.573	1.578	1.5737	1.569	0.005	568.7	54.472	11.6	11.9	11.9	0.97479	0.97479	2003	MRECA7	Mineral. Rec.	34	237
347	Cu2Mg2(PO4)2(OH)2 · 5H2O	nissonite	1.584	1.620	1.621	1.6083	1.612	-0.004	292.5	29.7	5	4.88	4.85	1.02459	1.03093	1967	AMMIAY	Am. Miner.	52	927
348	CuFe3+5.5Al0.5(PO4)4(OH)8· 4H2O	chalcosiderite	1.775	1.840	1.844	1.8197	1.821	-0.001	500.08	67.89	4	3.91	3.88	1.02302	1.03093	1921	BUGMAF	Geol. Soc. Amer. Bull.	679	56
349	Cu3.77Zn2.09(PO4)2(OH)6 · H2O	kipushite	1.693	1.738	1.740	1.7237	1.723	0.001	295.73	35.612	1	1.03	1.02	0.970874	0.980392	1985	CAMIA6	Can. Mineral.	23	35
350	Cu1.77Zn1.24PO4(OH)3 · 2H2O	veszelyite	1.640	1.658	1.6595	1.6525	1.662	-0.009	184.22	20.047	2	1.8	1.8	1.11111	1.11111	1951	REF-P2	REF-P2*	II	916
351	Zn4(PO4)2(OH)2 · 3H2O	spencerite	1.586	1.602	1.606	1.598	1.602	-0.004	276.21	27.573	3	2.89	2.89	1.03806	1.03806	1951	REF-P2	REF-P2*	II	931
352	ZnMnFe2Fe3+(PO4)3(OH)2 · 9H2O	schoonerite	1.618	1.652	1.682	1.6507	1.64	0.011	457.1	49.604	9	9.56	9.57	0.941423	0.940439	1977	AMMIAY	Am. Miner.	62	246
353	Al2PO4F2(OH) · 7H2O	fluellite	1.478	1.490	1.510	1.4927	1.506	-0.013	253.64	20.856	7	6.61	6.59	1.059	1.06222	1966	AMMIAY	Am. Miner.	51	1579
354	Fe3+2.92(PO4)2(OH)2.76 · 5.88H2O	ferristrunzite	1.664	1.698	1.757	1.7063	1.716	-0.01	317.43	37.333	5.88	5.62	5.61	1.04626	1.04813	1989	AMMIAY	Am. Miner.	74	502
355	Fe3+1.64Fe1.23Mg0.085Mn0.06(PO4)2(OH)1.726 · 6.36 H2O	metavivianite	1.600	1.640	1.685	1.6417	1.652	-0.01	320.18	34.272	6.36	6.02	6.02	1.05648	1.05648	2012	MNLMBB	Mineral. Mag.	76	725
356	Fe3+1.08Al6.92P5.94Si0.08O22(OH)10 · 16H2O	matulaite	1.535	1.563	1.579	1.559	1.562	-0.003	898.22	83.84	16	15.72	15.62	1.01781	1.02433	2012	MNLMBB	Mineral. Mag.	76	517
357	Y0.41Ce0.28Nd0.23Sm0.13La0.11Fe0.20Ca0.79Cu12.07(PO4)6(OH)12 · 6H2O	petersite-(Y)	1.666	1.666	1.747	1.693	1.672	0.021	449.3	51.869	3	4.05	4.08	0.740741	0.735294	1982	AMMIAY	Am. Miner.	67	1039
358	NaCa2Mg2.89Fe3+0.11Mn0.01(PO4)3(CO3) · 6H2O	girvasite	1.541	1.557	1.565	1.5543	1.554	0	427.09	39.532	6	6.01	5.97	0.998336	1.00503	1992	AMMIAY	Am. Miner.	77	207
359	Ca3.212Al7.7Si3.06P4O22.8(OH)15 · 8H2O	perhamite	1.564	1.564	1.577	1.5683	1.56	0.008	863.11	81.906	8	8.74	8.22	0.915332	0.973236	1977	MNLMBB	Mineral. Mag.	41	437
360	Ca2.41Sr0.41K0.06Zn0.05Na0.03Al7.6Fe0.08Ti0.04Si2.64P4.32O23.57(OH)13.2F1.67 · 8H2O	krásnoite	1.548	1.548	1.549	1.5483	1.571	-0.023	856.09	78.383	8	5.8	5.25	1.37931	1.52381	2012	MNLMBB	Mineral. Mag.	76	625
361	Ba0.77Sr0.2Ca0.03V4+1.92Al0.06Fe3+0.02O2(PO4)2 · 4H2O	bariosincosite	1.721	1.721	1.715	1.719	1.707	0.012	260	31.113	4	4.36	4.42	0.917431	0.904977	1999	MNLMBB	Mineral. Mag.	63	735
362	Cu1.90Zn0.1Cd1.96Ca0.02Mn0.02P2.07S0.88O12 · 5H2O	birchite	1.624	1.636	1.669	1.643	1.653	-0.01	337.4	36.189	5	4.62	4.35	1.08225	1.14943	2008	AMMIAY	Am. Miner.	93	910
363	Fe3+2(PO4)(SO4)(OH) · 6H2O	destinezite	1.615	1.625	1.665	1.635	1.648	-0.013	292.85	31.025	6	5.59	5.59	1.07335	1.07335	1999	CLCMAB	Clays Clay Miner.	47	1
364	Fe3+1.94(PO3OH)2(S0.96O4) · 5.46H2O	camaronesite	1.612	1.612	1.621	1.615	1.62	-0.005	340.94	34.995	5.46	5.27	5.27	1.03605	1.03605	2013	MNLMBB	Mineral. Mag.	77	453
365	(H5O2)Fe(SO4)2 · 2H2O	rhomboclase	1.533	1.550	1.635	1.5727	1.571	0.002	239.17	22.869	2	1.86	1.86	1.07527	1.07527	1929	AMMIAY	Am. Miner.	14	77
366	Li2SO4 · H2O		1.4615	1.4765	1.4863	1.4748	1.51	-0.035	103.65	8.21	1	0.57	0.76	1.75439	1.31579	2002	JPCRBU	J. Phys. Chem. Ref. Data	31	931
367	BeSO4 · 4H2O		1.4713	1.4713	1.4328	1.4585	1.456	0.003	170.86	13.065	4	4.04	4.04	0.990099	0.990099	2002	JPCRBU	J. Phys. Chem. Ref. Data	31	931
368	BeSO4 · 4H2O		1.4713	1.4713	1.4328	1.4585	1.457	0.002	170.58	13.043	4	4.03	4.03	0.992556	0.992556	2002	JPCRBU	J. Phys. Chem. Ref. Data	31	931
369	Na2SO4 · 10H2O	mirabilite	1.393	1.395	1.397	1.395	1.392	0.003	365.08	23.999	10	10.12	10.21	0.988142	0.979432	1932	XDIGAS	U.S. Geol. Surv. Bull.	833	80
370	NaHSO4 · H2O	matteuccite	1.43	1.46	1.48	1.4567	1.47	-0.013	108.32	8.25	1	0.83	0.88	1.20482	1.13636	1952	AANL8V	Atti Acad. Naz. Lincei Serie 8	12	23
371	Na2Mg(SO4)2 · 4H2O	blödite	1.481	1.483	1.484	1.4827	1.501	-0.018	249.97	20.134	4	3.47	3.56	1.15274	1.1236	1932	XDIGAS	U.S. Geol. Surv. Bull.	833	80
372	Na2Mg(SO4)2 · 4H2O	blödite	1.483	1.486	1.487	1.4853	1.501	-0.016	249.97	20.246	4	3.54	3.63	1.12994	1.10193	1932	XDIGAS	U.S. Geol. Surv. Bull.	833	80
373	Na2Mg(SO4)2 · 4H2O	blödite	1.486	1.488	1.489	1.4877	1.502	-0.014	249.64	20.317	4	3.59	3.68	1.11421	1.08696	1928	JACSAT	J. Am. Chem. Soc.	50	35
374	NaAl(SO4)2 · 6H2O	tamarugite	1.488	1.491	1.500	1.493	1.497	-0.004	281.55	23.167	6	5.87	5.91	1.02215	1.01523	1938	AMMIAY	Am. Miner.	23	669
375	NaAl(SO4)2 · 6H2O	tamarugite	1.484	1.488	1.499	1.4903	1.497	-0.007	281.55	23.04	6	5.79	5.82	1.03627	1.03093	1966	AMMIAY	Am. Miner.	51	1805
376	Na1.96Mn0.44Co0.14Mg0.29Ni0.06(SO4)2 · 4H2O	manganoblödite	1.493	1.498	1.501	1.4973	1.518	-0.021	251.1	20.844	4	3.42	3.52	1.16959	1.13636	2013	MNLMBB	Mineral. Mag.	77	367
377	Na3Fe3+(SO4)3 · 3H2O	ferrinatrite	1.558	1.558	1.613	1.5763	1.575	0.001	303.91	29.245	3	3.04	3.09	0.986842	0.970874	1938	AMMIAY	Am. Miner.	23	732
378	Na3Fe3+(SO4)3 · 3H2O	ferrinatrite	1.558	1.558	1.613	1.5763	1.575	0.001	303.91	29.245	3	3.04	3.09	0.986842	0.970874	1951	REF-P2	REF-P2*	II	456
379	Na3Fe3+(SO4)3 · 3H2O	ferrinatrite	1.558	1.558	1.613	1.5763	1.577	-0.001	302.84	29.142	3	2.97	3.02	1.0101	0.993377	1951	REF-P2	REF-P2*	II	456
380	NaFe3+(SO4)2 · 6H2O	amarillite	1.532	1.555	1.591	1.5593	1.566	-0.007	283.26	26.455	6	5.8	5.85	1.03448	1.02564	2015	REF-A	REF-A*	2015	A
381	Na1.96Co0.36Mg0.30Mn0.17Ni0.12(SO4)2 · 4H2O	cobaltoblödite	1.498	1.503	1.505	1.502	1.516	-0.014	250.98	21.031	4	3.6	3.69	1.11111	1.08401	2013	MNLMBB	Mineral. Mag.	77	367
382	Na2Ni0.79Mg0.14Fe0.08(SO4)2 · 4H2O	nickelblödite	1.513	1.518	1.520	1.517	1.554	-0.037	235.3	20.31	4	3.01	3.1	1.3289	1.29032	1977	MNLMBB	Mineral. Mag.	41	37
383	Na2Cu(SO4)2 · 2H2O	kröhnkite	1.5437	1.5775	1.6013	1.5742	1.591	-0.017	192.45	18.45	2	1.63	1.62	1.22699	1.23457	1908	AJSCAP	Amer. J. Sci.	26	342
384	Na2Cu(SO4)2 · 2H2O	kröhnkite	1.5437	1.5775	1.6013	1.5742	1.591	-0.017	192.45	18.45	2	1.63	1.62	1.22699	1.23457	1908	AJSCAP	Amer. J. Sci.	26	342
385	Na2Zn(SO4)2 · 4H2O	changoite	1.507	1.512	1.517	1.512	1.529	-0.017	248.76	21.263	4	3.53	3.62	1.13314	1.10497	1999	NJMMAW	Neues Jahrb. Mineral., Monatsh.	1999	97
386	NaPu3+(SO4)2 · H2O		1.604	1.604	1.649	1.619	1.636	-0.017	177.92	18.38	1	3.62	3.58	0.276243	0.27933	1954	REF-S	REF-S*	I	805
387	K1.92Na0.12Ca2Cu(SO4)4 · 2H2O	leightonite	1.578	1.587	1.595	1.5867	1.602	-0.015	360.39	35.299	2	1.34	1.14	1.49254	1.75439	1962	REFL8	REFL8*	II	205
388	K1.92Na0.08Ca2Cu(SO4)4 · 2H2O	leightonite	1.578	1.587	1.595	1.5867	1.602	-0.015	360.39	35.299	2	1.34	1.14	1.49254	1.75439	1962	REFL8	REFL8*	II	205
389	K1.98Na0.01Fe1.12Mg3.01Mn0.27Fe3+3.59Zn0.01Al(SO4)12 · 18H2O	pertlikite	1.590	1.590	1.586	1.5887	1.603	-0.014	1255.15	123.354	18	15.92	16.1	1.13065	1.11801	2008	CAMIA6	Can. Mineral.	46	661
390	K2Na6Fe0.66Cu0.3Zn0.06Fe3+6O2(SO4)12 · 18H2O	metavoltine	1.589	1.589	1.573	1.5837	1.581	0.003	1442.66	140.584	18	18.46	18.74	0.975081	0.960512	1938	AMMIAY	Am. Miner.	23	669
391	K2Mg(SO4)2 · 4H2O	leonite	1.479	1.482	1.487	1.4827	1.491	-0.008	276.35	22.258	4	3.73	3.74	1.07239	1.06952	1932	XDIGAS	U.S. Geol. Surv. Bull.	833	80
392	K2Ca2Mg(SO4)4 · 2H2O	polyhalite	1.547	1.560	1.567	1.558	1.575	-0.017	362.36	33.762	2	1.3	1.1	1.53846	1.81818	1932	XDIGAS	U.S. Geol. Surv. Bull.	833	80
393	K2Ca2Cu(SO4)4 · 2H2O	leightonite	1.578	1.587	1.595	1.5867	1.603	-0.016	360.78	35.337	2	1.31	1.11	1.52672	1.8018	1938	AMMIAY	Am. Miner.	23	34
394	K1.79Ca0.25Zn3.69Fe0.91Mn0.35Fe3+2.89Al1.01(SO4)12 · 18H2O	zincovoltaite	1.605	1.605	1.605	1.605	1.61	-0.005	1254.9	126.729	18	17.24	17.43	1.04408	1.0327	1990	AMMIAY	Am. Miner.	75	244
395	KFe(SO4)2 · H2O	krausite	1.588	1.650	1.722	1.6533	1.648	0.005	179.15	19.52	1	1.11	1.08	0.900901	0.925926	1931	AMMIAY	Am. Miner.	16	352
396	KFe(SO4)2 · 4H2O	goldichite	1.582	1.602	1.629	1.6043	1.601	0.003	242.28	24.44	4	4.1	4.1	0.97561	0.97561	1955	AMMIAY	Am. Miner.	40	469
397	K2Fe(SO4)2 · 4H2O	mereiterite	1.497	1.501	1.509	1.5023	1.51	-0.008	280.15	23.491	4	3.75	3.63	1.06667	1.10193	1995	EJMIER	Eur. J. Mineral.	7	559
398	K2Fe4Zn0.43Na0.33Mg0.24Cu0.14Ni0.02Fe3+3.46Al0.64(SO4)12 · 18H2O	voltaite	1.5998	1.5998	1.5998	1.5998	1.618	-0.018	1265.2	126.679	18	15.33	15.55	1.17417	1.15756	1951	REF-P2	REF-P2*	II	464
399	K2Fe4Zn0.43Na0.33Mg0.24Cu0.14Ni0.02Fe3+3.46Al0.64(SO4)12 · 18H2O	voltaite	1.5998	1.5998	1.5998	1.5998	1.618	-0.018	1265.2	126.679	18	15.33	15.55	1.17417	1.15756	1951	REF-P2	REF-P2*	II	464
400	K2Cu(SO4)2 · 6H2O	cyanochroite	1.4836	1.4864	1.5020	1.4907	1.505	-0.014	327.48	26.814	6	5.48	5.56	1.09489	1.07914	1951	REF-P2	REF-P2*	II	454
401	K4Ce4+(SO4)4 · 2H2O		1.555	1.557	1.593	1.5683	1.579	-0.011	435.66	41.342	2	1.46	1.56	1.36986	1.28205	1961	RJICAQ	Russ. J. Inorg. Chem.	6	324
402	K4Pu4+(SO4)4 · 2H2O		1.531	1.533	1.560	1.5413	1.536	0.005	435.83	39.394	2	2.28	2.18	0.877193	0.917431	1954	REF-S	REF-S*	I	823
403	KVO2(SO4) · 3H2O		1.555	1.592	1.610	1.5857	1.596	-0.01	192.55	18.828	3	2.79	2.2	1.07527	1.36364	2011	RJICAQ	Russ. J. Inorg. Chem.	56	19
404	Rb4Pu4+(SO4)4 · 2H2O		1.534	1.539	1.563	1.5453	1.544	0.001	451.12	41.078	2	2.04	1.85	0.980392	1.08108	1954	REF-S	REF-S*	I	824
405	RbVO2(SO4) · 3H2O		1.560	1.597	1.615	1.5907	1.588	0.003	199.38	19.661	3	3.05	2.39	0.983607	1.25523	2011	RJICAQ	Russ. J. Inorg. Chem.	56	326
406	[(NH4)4.64Na0.24K0.12]Fe3+3O(SO4)6 · 7H2O	carlsonite	1.576	1.585	1.591	1.584	1.584	0	753.07	73.427	7	6.82	7.06	1.02639	0.991501	2016	AMMIAY	Am. Miner.	101	2095
407	(NH4)2.18K0.02Mg3.18Fe1.51Mn0.30Fe3+2.81Al1.19(SO4)12 · 18H2O	ammoniomagnesiovoltaite	1.60	1.60	1.60	1.6	1.597	0.003	1266.06	126.807	18	18.5	18.65	0.972973	0.965147	2012	CAMIA6	Can. Mineral.	50	65
408	(NH4)2Ca(SO4)2 · H2O	koktaite	1.524	1.532	1.536	1.5307	1.543	-0.012	224.82	19.92	1	0.67	0.63	1.49254	1.5873	1951	REF-P2	REF-P2*	II	444
409	MgSO4 · H2O	kieserite	1.523	1.535	1.586	1.548	1.57	-0.022	88.9	8.135	1	0.77	0.76	1.2987	1.31579	1927	JACSAT	J. Am. Chem. Soc.	49	2772
410	MgSO4 · H2O	kieserite	1.5178	1.5510	1.5832	1.5507	1.57	-0.019	88.9	8.174	1	0.8	0.79	1.25	1.26582	1962	REFL8	REFL8*	II	65
411	MgSO4 · H2O	kieserite	1.520	1.533	1.584	1.5457	1.57	-0.024	88.9	8.1	1	0.74	0.73	1.35135	1.36986	1932	XDIGAS	U.S. Geol. Surv. Bull.	833	80
412	MgSO4 · 3H2O		1.495	1.497	1.498	1.4967	1.508	-0.011	139.14	11.535	3	2.82	2.81	1.06383	1.06762	1967	KASTAL	Kali Steinsalz	4	326
413	MgSO4 · 4H2O	starkeyite	1.490	1.491	1.497	1.4927	1.505	-0.012	159.2	13.09	4	3.78	3.77	1.0582	1.06101	1927	JACSAT	J. Am. Chem. Soc.	49	2772
414	MgSO4 · 4H2O	starkeyite	1.490	1.491	1.497	1.4927	1.505	-0.012	159.2	13.09	4	3.78	3.77	1.0582	1.06101	1967	KASTAL	Kali Steinsalz	4	326
415	Mg0.86Fe0.14SO4 · 4H2O	starkeyite	1.490	1.491	1.497	1.4927	1.511	-0.018	159.7	13.132	4	3.67	3.67	1.08992	1.08992	2015	REF-A	REF-A*	2015	5
416	MgSO4 · 5H2O	pentahydrite	1.482	1.492	1.493	1.489	1.495	-0.006	182.21	14.87	5	4.87	4.86	1.02669	1.02881	1927	JACSAT	J. Am. Chem. Soc.	49	2772
417	MgSO4 · 5H2O	pentahydrite	1.482	1.492	1.493	1.489	1.495	-0.006	182.21	14.87	5	4.87	4.86	1.02669	1.02881	1962	REFL8	REFL8*	II	65
418	MgSO4 · 6H2O	hexahydrite	1.438	1.463	1.465	1.4553	1.467	-0.012	214.88	16.317	6	5.73	5.72	1.04712	1.04895	1927	JACSAT	J. Am. Chem. Soc.	49	2772
419	MgSO4 · 6H2O	hexahydrite	1.426	1.453	1.456	1.445	1.467	-0.022	214.88	15.942	6	5.49	5.48	1.0929	1.09489	1967	KASTAL	Kali Steinsalz	4	326
420	MgSO4 · 6H2O	hexahydrite	1.438	1.463	1.465	1.4553	1.467	-0.012	214.88	16.317	6	5.73	5.72	1.04712	1.04895	1931	REF-W1	REF-W1*	2	231
421	MgSO4 · 6H2O	hexahydrite	1.426	1.453	1.456	1.445	1.456	-0.011	220.15	16.333	6	5.73	5.72	1.04712	1.04895	1951	REF-P2	REF-P2*	II	494
422	MgSO4 · 7H2O	epsomite	1.432	1.455	1.461	1.4493	1.451	-0.002	244.05	18.285	7	6.94	6.93	1.00865	1.0101	1967	KASTAL	Kali Steinsalz	4	326
423	MgSO4 · 7H2O	epsomite	1.4330	1.4550	1.4610	1.4497	1.452	-0.002	244.05	18.299	7	6.95	6.94	1.00719	1.00865	2002	JPCRBU	J. Phys. Chem. Ref. Data	31	931
424	MgSO4 · 7H2O	epsomite	1.4326	1.4555	1.4607	1.4496	1.451	-0.001	244.05	18.295	7	6.95	6.94	1.00719	1.00865	2002	JPCRBU	J. Phys. Chem. Ref. Data	31	931
425	MgSO4 · 7H2O	epsomite	1.430	1.453	1.459	1.4473	1.451	-0.004	244.05	18.203	7	6.89	6.88	1.01597	1.01744	1957	RFNBSC	RFNBSC*	7	30
426	MgSO4 · 7H2O	epsomite	1.4326	1.4555	1.4607	1.4496	1.453	-0.003	243.47	18.252	7	6.92	6.91	1.01156	1.01302	2002	JPCRBU	J. Phys. Chem. Ref. Data	31	931
427	MgSO4 · 7H2O	epsomite	1.4326	1.4555	1.4607	1.4496	1.453	-0.003	243.47	18.252	7	6.92	6.91	1.01156	1.01302	2002	JPCRBU	J. Phys. Chem. Ref. Data	31	931
428	MgAl2(SO4)4 · 22H2O	pickeringite	1.475	1.480	1.483	1.4793	1.478	0.001	783.65	62.678	22	22.09	22.06	0.995926	0.99728	1938	AMMIAY	Am. Miner.	23	727
429	MgAl2(SO4)4 · 22H2O	pickeringite	1.475	1.480	1.483	1.4793	1.478	0.001	783.65	62.678	22	22.09	22.06	0.995926	0.99728	1921	BUGMAF	Geol. Soc. Amer. Bull.	679	119
430	Mg0.93Mn0.07Al2(SO4)4 · 22H2O	pickeringite	1.475	1.480	1.483	1.4793	1.478	0.001	783.65	62.678	22	22.09	22.06	0.995926	0.99728	1921	BUGMAF	Geol. Soc. Amer. Bull.	679	119
431	Mg0.93Mn0.07Al2(SO4)4 · 22H2O	pickeringite	1.475	1.480	1.483	1.4793	1.478	0.001	783.65	62.678	22	22.09	22.06	0.995926	0.99728	1921	BUGMAF	Geol. Soc. Amer. Bull.	679	119
432	CaSO4 · 0.5H2O	bassanite	1.550	1.560	1.577	1.5623	1.587	-0.025	87.94	8.257	0.5	0.25	0.18	2	2.77778	1953	AMMIAY	Am. Miner.	38	1266
433	CaSO4 · 2H2O	gypsum	1.5205	1.5224	1.5296	1.5242	1.539	-0.015	123.79	10.834	2	1.8	1.76	1.11111	1.13636	1934	ZEKRDZ	Z. Kristallogr.	87	43
434	CaSO4 · 2H2O	gypsum	1.5207	1.5227	1.5304	1.5246	1.539	-0.014	123.65	10.83	2	1.79	1.76	1.11732	1.13636	1913	ZEKRDZ	Z. Kristallogr.	52	218
435	MnSO4 · H2O	szmikite	1.562	1.595	1.632	1.5963	1.626	-0.03	95.28	9.485	1	0.68	0.68	1.47059	1.47059	1920	AJSCAP	Amer. J. Sci.	50	225
436	MnSO4 · H2O	szmikite	1.560	1.592	1.627	1.593	1.626	-0.033	95.28	9.432	1	0.64	0.65	1.5625	1.53846	1920	AJSCAP	Amer. J. Sci.	50	225
437	MnSO4 · 4H2O	ilesite	1.508	1.518	1.522	1.516	1.537	-0.021	166.08	14.307	4	3.62	3.63	1.10497	1.10193	1920	AJSCAP	Amer. J. Sci.	50	225
438	MnSO4 · 4H2O	ilesite	1.508	1.518	1.522	1.516	1.537	-0.021	166.08	14.307	4	3.62	3.63	1.10497	1.10193	1931	REF-W1	REF-W1*	2	231
439	Mn0.6Zn0.3Fe0.1SO4 · 4H2O	ilesite	1.511	1.519	1.521	1.517	1.535	-0.018	165.86	14.316	4	3.67	3.67	1.08992	1.08992	1951	REF-P2	REF-P2*	486	1
440	MnSO4 · 5H2O	jôkokuite	1.495	1.508	1.514	1.5057	1.522	-0.016	189.81	16.022	5	4.67	4.68	1.07066	1.06838	1931	REF-W1	REF-W1*	2	234
441	MnSO4 · 5H2O	jôkokuite	1.495	1.508	1.514	1.5057	1.522	-0.016	189.81	16.022	5	4.67	4.68	1.07066	1.06838	1920	AJSCAP	Amer. J. Sci.	50	225
442	Mn0.64Mg0.28Zn0.06Fe0.02Al2(SO4)4 · 22H2O	apjohnite	1.478	1.482	1.482	1.4807	1.483	-0.002	789.39	63.315	22	21.84	21.82	1.00733	1.00825	1951	REF-P2	REF-P2*	II	527
443	FeSO4 · H2O	szomolnokite	1.591	1.623	1.663	1.6257	1.65	-0.024	91.12	9.513	1	0.74	0.75	1.35135	1.33333	1938	AMMIAY	Am. Miner.	23	714
444	FeSO4 · H2O	szomolnokite	1.591	1.623	1.663	1.6257	1.65	-0.024	91.12	9.513	1	0.74	0.75	1.35135	1.33333	1997	REF-G	REF-G*	8	596
445	FeSO4 · 4H2O	rozenite	1.527	1.536	1.541	1.5347	1.554	-0.019	160.37	14.317	4	3.67	3.67	1.08992	1.08992	1963	CAMIA6	Can. Mineral.	7	751
446	FeSO4 · 7H2O	melanterite	1.471	1.478	1.486	1.4783	1.492	-0.014	240.71	19.212	7	6.65	6.65	1.05263	1.05263	1920	AJSCAP	Amer. J. Sci.	50	225
447	FeSO4 · 7H2O	melanterite	1.4713	1.4782	1.4856	1.4784	1.492	-0.014	240.71	19.213	7	6.65	6.65	1.05263	1.05263	1931	REF-W1	REF-W1*	2	231
448	Fe2(SO4)3 · 7H2O	kornelite	1.5720	1.5860	1.6400	1.5993	1.594	0.005	387.47	38.766	7.25	7.52	7.51	0.964096	0.965379	2002	JPCRBU	J. Phys. Chem. Ref. Data	31	931
449	Fe2(SO4)3 · 9H2O	paracoquimbite	1.5455	1.5455	1.5547	1.5486	1.56	-0.011	441.97	40.713	9	8.6	8.6	1.04651	1.04651	1971	AMMIAY	Am. Miner.	56	1567
450	Fe1.55Al0.45(SO4)3 · 9H2O	coquimbite	1.5390	1.5390	1.5480	1.542	1.54	0.002	441.21	39.93	9	9.1	9.09	0.989011	0.990099	1970	AMMIAY	Am. Miner.	55	1534
451	FeAl2(SO4)4 · 22H2O	halotrichite	1.480	1.486	1.490	1.4853	1.487	-0.002	786.11	63.669	22	21.83	21.8	1.00779	1.00917	1938	AMMIAY	Am. Miner.	23	728
452	FeFe3+2(SO4)4 · 14H2O	römerite	1.526	1.564	1.575	1.555	1.563	-0.008	613.98	56.899	14	13.47	13.46	1.03935	1.04012	1938	AMMIAY	Am. Miner.	23	734
453	FeFe3+2(SO4)4 · 14H2O	römerite	1.519	1.570	1.580	1.5563	1.563	-0.007	613.98	57.036	14	13.56	13.56	1.03245	1.03245	1951	REF-P2	REF-P2*	II	521
454	Fe0.55Cu0.44Co0.01SO4 · 5H2O	siderotil	1.514	1.526	1.535	1.525	1.54	-0.015	183.31	16.068	5	4.69	4.69	1.0661	1.0661	1963	CAMIA6	Can. Mineral.	7	751
455	CoSO4 · H2O		1.603	1.639	1.683	1.6417	1.646	-0.004	88.35	9.457	1	0.96	0.95	1.04167	1.05263	1920	AJSCAP	Amer. J. Sci.	50	225
456	CoSO4 · 6H2O		1.495	1.495	1.460	1.4833	1.492	-0.009	216.65	17.474	6	5.79	5.78	1.03627	1.03806	1920	AJSCAP	Amer. J. Sci.	50	225
457	CoSO4 · 7H2O	bieberite	1.477	1.483	1.489	1.483	1.485	-0.002	240.18	19.358	7	6.96	6.95	1.00575	1.00719	1920	AJSCAP	Amer. J. Sci.	50	225
458	CoSO4 · 7H2O	bieberite	1.4748	1.4820	1.4885	1.4818	1.485	-0.003	240.18	19.309	7	6.93	6.92	1.0101	1.01156	1962	REFL8	REFL8*	II	196
459	Co0.55Ni0.25Mn0.12Cu0.05Fe0.03SO4 · 6H2O	moorhouseite	1.470	1.496	1.497	1.4877	1.499	-0.011	214.46	17.454	6	5.73	5.73	1.04712	1.04712	1965	CAMIA6	Can. Mineral.	8	166
460	NiSO4 · 6H2O	retgersite	1.5107	1.5107	1.4870	1.5028	1.505	-0.002	210.72	17.686	6	5.94	5.94	1.0101	1.0101	2002	JPCRBU	J. Phys. Chem. Ref. Data	31	931
461	NiSO4 · 6H2O	retgersite	1.5107	1.5107	1.4870	1.5028	1.505	-0.002	210.72	17.686	6	5.94	5.94	1.0101	1.0101	2002	JPCRBU	J. Phys. Chem. Ref. Data	31	931
462	NiSO4 · 7H2O	morenosite	1.4693	1.4893	1.4923	1.4836	1.487	-0.003	239	19.289	7	6.92	6.92	1.01156	1.01156	1931	REF-W1	REF-W1*	2	227
463	CuSO4 · H2O		1.626	1.671	1.699	1.6653	1.685	-0.02	87.97	9.758	1	0.81	0.8	1.23457	1.25	1931	REF-W1	REF-W1*	2	229
464	CuSO4 · H2O		1.626	1.671	1.699	1.6653	1.686	-0.021	87.8	9.739	1	0.79	0.79	1.26582	1.26582	1931	REF-W1	REF-W1*	2	229
465	CuSO4 · 3H2O	bonattite	1.554	1.577	1.618	1.583	1.602	-0.019	132.7	12.917	3	2.71	2.71	1.10701	1.10701	1931	REF-W1	REF-W1*	2	230
466	CuSO4 · 3H2O	bonattite	1.554	1.577	1.618	1.583	1.602	-0.019	132.7	12.917	3	2.71	2.71	1.10701	1.10701	1958	AMMIAY	Am. Miner.	43	180
467	CuSO4 · 3H2O	bonattite	1.554	1.577	1.618	1.583	1.602	-0.019	132.7	12.917	3	2.71	2.71	1.10701	1.10701	1931	REF-W1	REF-W1*	2	230
468	CuSO4 · 5H2O	chalcanthite	1.5140	1.5367	1.5436	1.5314	1.544	-0.013	183.18	16.254	5	4.74	4.74	1.05485	1.05485	1942	SMPTA8	Schweiz. Miner. Petrogr. Mitt.	22	1
469	CuSO4 · 5H2O	chalcanthite	1.5140	1.5367	1.5436	1.5314	1.55	-0.019	181.27	16.085	5	4.64	4.63	1.07759	1.07991	1942	SMPTA8	Schweiz. Miner. Petrogr. Mitt.	22	1
470	CuSO4 · 5H2O	chalcanthite	1.5140	1.5367	1.5436	1.5314	1.55	-0.019	181.27	16.085	5	4.64	4.63	1.07759	1.07991	2002	JPCRBU	J. Phys. Chem. Ref. Data	31	931
471	ZnSO4 · 7H2O	goslarite	1.4568	1.4801	1.4836	1.4735	1.478	-0.004	243.56	19.241	7	6.88	6.88	1.01744	1.01744	1931	REF-W1	REF-W1*	2	227
472	ZnSO4 · 7H2O	goslarite	1.457	1.480	1.484	1.4737	1.478	-0.004	243.56	19.248	7	6.89	6.88	1.01597	1.01744	1920	AJSCAP	Amer. J. Sci.	50	225
473	ZnSO4 · 7H2O		1.4568	1.4801	1.4836	1.4735	1.481	-0.007	242.07	19.123	7	6.81	6.8	1.0279	1.02941	1962	REFL8	REFL8*	II	212
474	Zr(SO4)2 · 4H2O	zircosulfate	1.618	1.646	1.676	1.6467	1.65	-0.003	208.27	22.465	4	3.93	3.68	1.01781	1.08696	1966	AMMIAY	Am. Miner.	51	529
475	Al2(SO4)3 · 17H2O	alunogen	1.460	1.461	1.470	1.4637	1.473	-0.009	601.36	46.511	17	16.37	16.35	1.03849	1.03976	1928	AJSCAP	Amer. J. Sci.	15	1
476	Al2(SO4)3 · 17H2O	alunogen	1.459	1.463	1.473	1.465	1.473	-0.008	601.36	46.646	17	16.46	16.44	1.03281	1.03406	1951	REF-P2	REF-P2*	24	537
477	Al1.07Fe0.93(SO4)3 · 9H2O	aluminocoquimbite	1.53	1.53	1.56	1.54	1.525	0.015	429.55	38.731	9	9.74	9.72	0.924025	0.925926	2010	CAMIA6	Can. Mineral.	48	1465
478	Fe3+2O(SO4)2 · 7H2O	amarantite	1.516	1.598	1.621	1.5783	1.585	-0.007	341.64	32.989	7	6.75	6.75	1.03704	1.03704	1938	AMMIAY	Am. Miner.	23	669
479	Fe3+2O(SO4)2 · 8H2O	hohmannite	1.559	1.643	1.655	1.619	1.61	0.009	342.4	35.371	8	8.33	8.32	0.960384	0.961538	1938	AMMIAY	Am. Miner.	23	669
480	Fe3+2(SO4)3 · 11H2O	quenstedtite	1.547	1.566	1.594	1.569	1.576	-0.007	462.18	43.912	11	10.65	10.65	1.03286	1.03286	1938	AMMIAY	Am. Miner.	23	669
481	V4+OSO4 · 3H2O	bobjonesite	1.555	1.561	1.574	1.5633	1.581	-0.018	158.37	14.897	3	2.69	2.68	1.11524	1.1194	2003	CAMIA6	Can. Mineral.	41	83
482	V4+OSO4 · 5H2O	orthominasragrite	1.529	1.534	1.534	1.5323	1.534	-0.002	208.95	18.572	5	4.95	4.93	1.0101	1.0142	2001	CAMIA6	Can. Mineral.	39	1325
483	V4+OSO4 · 5H2O	minasragrite	1.513	1.536	1.545	1.5313	1.541	-0.01	206.44	18.314	5	4.79	4.77	1.04384	1.04822	1973	AMMIAY	Am. Miner.	58	531
484	V4+OSO4 · 5H2O	anorthominasragrite	1.548	1.555	1.574	1.559	1.561	-0.002	198.55	18.533	5	4.96	4.94	1.00806	1.01215	2003	CAMIA6	Can. Mineral.	41	959
485	V4+1.04OS0.98O4 · 5H2O	anorthominasragrite	1.548	1.555	1.574	1.559	1.567	-0.008	198.55	18.533	5	4.89	4.87	1.02249	1.02669	2003	CAMIA6	Can. Mineral.	41	959
486	V4+OSO4 · 6H2O	stanleyite	1.505	1.519	1.533	1.519	1.531	-0.012	228.4	19.791	6	5.71	5.69	1.05079	1.05448	1980	ACBCAR	Acta Crystallogr. ,Sect. B	36	249
487	Y2(SO4)3 · 8H2O		1.5433	1.549	1.5755	1.5559	1.557	-0.001	401.43	37.264	8	7.94	7.92	1.00756	1.0101	1931	REF-W1	REF-W1*	2	237
488	Pr2(SO4)3 · 8H2O		1.5394	1.5494	1.5607	1.5498	1.566	-0.016	422.85	38.822	8	7.25	7.45	1.10345	1.07383	1931	REF-W1	REF-W1*	2	237
489	La2(SO4)3 · 9H2O		1.5673	1.5673	1.5696	1.5681	1.584	-0.016	422.87	40.11	9	8.27	8	1.08827	1.125	1977	CRTEDF	Cryst. Res. and Technol.	12	9
490	Ce3+2(SO4)3 · 9H2O		1.575	1.575	1.588	1.5793	1.584	-0.005	419.87	40.613	9	8.77	8.53	1.02623	1.0551	1978	CRTEDF	Cryst. Res. and Technol.	13	909
491	Ce4+(SO4)2 · 4H2O		1.640	1.689	1.784	1.7043	1.691	0.013	227.37	26.667	4	4.33	4.35	0.923788	0.91954	1961	RJICAQ	Russ. J. Inorg. Chem.	6	324
492	U4+(SO4)2 · 4H2O	bĕhounekite	1.590	1.618	1.659	1.6223	1.623	-0.001	230.86	23.976	4	3.97	3.97	1.00756	1.00756	2011	MNLMBB	Mineral. Mag.	75	2739
493	U4+(SO4)2 · 4H2O		1.588	1.620	1.659	1.6223	1.622	0	231.47	24.039	4	4.01	4.01	0.997506	0.997506	1954	REF-S	REF-S*	I	820
494	Pu4+(SO4)2 · 4H2O		1.611	1.644	1.688	1.6477	1.638	0.01	223.45	24.139	4	4.25	4.45	0.941176	0.898876	1954	REF-S	REF-S*	I	820
495	K2Mg(SO4)2 · 6H2O		1.4606	1.4628	1.4754	1.4663	1.473	-0.007	330.2	25.682	6	5.77	5.84	1.03986	1.0274	2002	JPCRBU	J. Phys. Chem. Ref. Data	31	931
496	K2Fe(SO4)2 · 6H2O		1.4757	1.4821	1.4969	1.4849	1.494	-0.009	332.69	26.921	6	5.66	5.75	1.06007	1.04348	2002	JPCRBU	J. Phys. Chem. Ref. Data	31	931
497	K2Co(SO4)2 · 6H2O		1.4806	1.4864	1.5001	1.489	1.493	-0.004	328.88	26.841	6	5.84	5.91	1.0274	1.01523	2002	JPCRBU	J. Phys. Chem. Ref. Data	31	931
498	K2Ni(SO4)2 · 6H2O		1.4835	1.4916	1.5050	1.4934	1.501	-0.008	323.4	26.629	6	5.72	5.79	1.04895	1.03627	2002	JPCRBU	J. Phys. Chem. Ref. Data	31	931
499	K2Cu(SO4)2 · 6H2O		1.4835	1.4863	1.5019	1.4906	1.505	-0.014	327.5	26.814	6	5.48	5.56	1.09489	1.07914	2002	JPCRBU	J. Phys. Chem. Ref. Data	31	931
500	K2Zn(SO4)2 · 6H2O		1.4774	1.4832	1.4967	1.4858	1.496	-0.01	327.13	26.519	6	5.64	5.71	1.06383	1.05079	2002	JPCRBU	J. Phys. Chem. Ref. Data	31	931
501	Rb2Mg(SO4)2 · 6H2O		1.4672	1.4689	1.4779	1.4713	1.465	0.006	343.86	27.039	6	6.23	6.02	0.963082	0.996678	1996	JCSOA9	J. Chem. Soc.	69	344
502	Rb2Mn(SO4)2 · 6H2O		1.4767	1.4807	1.4907	1.4827	1.49	-0.007	351.65	28.325	6	5.7	5.92	1.05263	1.01351	1931	REF-W1	REF-W1*	2	243
503	Rb2Fe(SO4)2 · 6H2O		1.4815	1.4873	1.4977	1.4888	1.485	0.004	346.8	28.292	6	6.13	5.93	0.978793	1.0118	2002	JPCRBU	J. Phys. Chem. Ref. Data	31	931
504	Rb2Co(SO4)2 · 6H2O		1.4858	1.4915	1.5012	1.4928	1.486	0.007	341.76	28.112	6	6.25	6.03	0.96	0.995025	2002	JPCRBU	J. Phys. Chem. Ref. Data	31	931
505	Rb2Ni(SO4)2 · 6H2O		1.4895	1.4960	1.5051	1.4969	1.489	0.008	339.74	28.175	6	6.29	6.09	0.953895	0.985222	2002	JPCRBU	J. Phys. Chem. Ref. Data	31	931
506	Rb2Cu(SO4)2 · 6H2O		1.4886	1.4906	1.5036	1.4943	1.505	-0.011	343	28.295	6	5.6	5.81	1.07143	1.0327	2002	JPCRBU	J. Phys. Chem. Ref. Data	31	931
507	Rb2Zn(SO4)2 · 6H2O		1.4833	1.4883	1.4975	1.4897	1.484	0.006	343.24	28.052	6	6.21	6	0.966184	1	2002	JPCRBU	J. Phys. Chem. Ref. Data	31	931
508	Cs2Mg(SO4)2 · 6H2O		1.4857	1.4858	1.4916	1.4877	1.479	0.009	364.8	29.691	6	6.34	6.07	0.946372	0.988468	1996	JCSOA9	J. Chem. Soc.	69	344
509	Cs2Mg(SO4)2 · 6H2O		1.4855	1.4857	1.4915	1.4876	1.499	-0.011	364.5	29.691	6	5.56	6.07	1.07914	0.988468	2002	JPCRBU	J. Phys. Chem. Ref. Data	31	931
510	Cs2Mn(SO4)2 · 6H2O		1.4946	1.4964	1.5024	1.4978	1.492	0.006	373.04	30.996	6	6.25	5.99	0.96	1.00167	2002	JPCRBU	J. Phys. Chem. Ref. Data	31	931
511	Cs2Fe(SO4)2 · 6H2O		1.5003	1.5035	1.5093	1.5044	1.498	0.006	368.06	30.988	6	6.28	6.01	0.955414	0.998336	2002	JPCRBU	J. Phys. Chem. Ref. Data	31	931
512	Cs2Co(SO4)2 · 6H2O		1.5055	1.5084	1.5130	1.509	1.498	0.011	363.4	30.877	6	6.43	6.16	0.933126	0.974026	2002	JPCRBU	J. Phys. Chem. Ref. Data	31	931
513	Cs2Ni(SO4)2 · 6H2O		1.5087	1.5129	1.5162	1.5126	1.504	0.009	359.22	30.74	6	6.35	6.09	0.944882	0.985222	1931	REF-W1	REF-W1*	2	248
514	Cs2Cu(SO4)2 · 6H2O		1.5047	1.5061	1.5152	1.5087	1.506	0.003	363.7	30.884	6	6.09	5.82	0.985222	1.03093	2002	JPCRBU	J. Phys. Chem. Ref. Data	31	931
515	Cs2Zn(SO4)2 · 6H2O		1.5021	1.5047	1.5092	1.5053	1.497	0.008	363.89	30.695	6	6.32	6.05	0.949367	0.991736	2002	JPCRBU	J. Phys. Chem. Ref. Data	31	931
516	(NH4)2Mg(SO4)2 · 6H2O	boussingaultite	1.4716	1.4730	1.4786	1.4744	1.477	-0.003	347.24	27.485	6	5.88	5.92	1.02041	1.01351	1905	JCSOA9	J. Chem. Soc.	87	1123
517	(NH4)2Mn(SO4)2 · 6H2O		1.4801	1.4840	1.4913	1.4851	1.487	-0.002	358.24	29.003	6	5.92	5.97	1.01351	1.00503	1916	PTRMAD	Philosoph. Trans. R. Soc. A	216A	1
518	(NH4)2Fe(SO4)2 · 6H2O	mohrite	1.4870	1.4915	1.4991	1.4925	1.495	-0.002	352.14	28.947	6	5.92	5.97	1.01351	1.00503	1913	PRLAAZ	Proc. R. Soc. London, Ser. A	88A	361
519	(NH4)2Co(SO4)2 · 6H2O		1.4902	1.4953	1.5032	1.4962	1.498	-0.002	345.48	28.615	6	5.94	5.97	1.0101	1.00503	1916	PTRMAD	Philosoph. Trans. R. Soc. A	216A	1
520	(NH4)2Ni(SO4)2 · 6H2O	nickelboussingaultite	1.4949	1.5007	1.5081	1.5012	1.502	-0.001	342.34	28.642	6	5.96	6.01	1.00671	0.998336	1916	PTRMAD	Philosoph. Trans. R. Soc. A	216A	1
521	(NH4)1.59Na0.07Ni0.90Mg0.23Cu0.14Fe0.02(SO4)2 · 6H2O	nickelboussingaultite	1.501	1.494	1.490	1.495	1.492	0.003	343.31	28.364	6	6.13	6.16	0.978793	0.974026	1986	AMMIAY	Am. Miner.	71	1545
522	(NH4)2Cu(SO4)2 · 6H2O		1.4910	1.5007	1.5054	1.499	1.506	-0.007	345.82	28.806	6	5.72	5.76	1.04895	1.04167	1916	PTRMAD	Philosoph. Trans. R. Soc. A	216A	1
523	(NH4)2Zn(SO4)2 · 6H2O		1.4889	1.4932	1.4994	1.4938	1.498	-0.004	345.39	28.468	6	5.85	5.89	1.02564	1.01868	1905	JCSOA9	J. Chem. Soc.	87	1123
524	(NH4)2Cd(SO4)2 · 6H2O		1.4847	1.4887	1.4959	1.4898	1.49	0	363.81	29.737	6	5.98	6.03	1.00334	0.995025	1916	PTRMAD	Philosoph. Trans. R. Soc. A	216A	1
525	NaAl(SO4)2 · 12H2O		1.4387	1.4387	1.4387	1.4387	1.435	0.004	455.43	33.306	12	12.19	12.05	0.984413	0.995851	2002	JPCRBU	J. Phys. Chem. Ref. Data	31	931
526	KAl(SO4)2 · 12H2O		1.4562	1.4562	1.4562	1.4562	1.455	0.001	449.28	34.182	12	12.06	12.08	0.995025	0.993377	2002	JPCRBU	J. Phys. Chem. Ref. Data	31	931
527	KCr(SO4)2 · 12H2O		1.4813	1.4813	1.4813	1.4813	1.484	-0.003	453.51	36.422	12	11.84	11.88	1.01351	1.0101	2002	JPCRBU	J. Phys. Chem. Ref. Data	31	931
528	KFe(SO4)2 · 12H2O		1.4815	1.4815	1.4815	1.4815	1.49	-0.008	458.89	36.869	12	11.59	11.62	1.03538	1.0327	2002	JPCRBU	J. Phys. Chem. Ref. Data	31	931
529	KGa(SO4)2 · 12H2O		1.4653	1.4653	1.4653	1.4653	1.466	-0.001	452.4	35.114	12	11.98	11.93	1.00167	1.00587	2002	JPCRBU	J. Phys. Chem. Ref. Data	31	931
530	RbAl(SO4)2 · 12H2O		1.4565	1.4565	1.4565	1.4565	1.454	0.003	458.78	34.929	12	12.12	12.21	0.990099	0.982801	2002	JPCRBU	J. Phys. Chem. Ref. Data	31	931
531	RbV3+(SO4)2 · 12H2O		1.469	1.469	1.469	1.469	1.472	-0.003	472.96	37.005	12	11.82	11.93	1.01523	1.00587	1931	REF-W1	REF-W1*	2	260
532	RbCr(SO4)2 · 12H2O		1.4814	1.4814	1.4814	1.4814	1.483	-0.002	462.84	37.179	12	11.91	12.02	1.00756	0.998336	2002	JPCRBU	J. Phys. Chem. Ref. Data	31	931
533	RbFe(SO4)2 · 12H2O		1.4822	1.4822	1.4822	1.4822	1.489	-0.007	467.6	37.625	12	11.66	11.76	1.02916	1.02041	2002	JPCRBU	J. Phys. Chem. Ref. Data	31	931
534	RbGa(SO4)2 · 12H2O		1.4657	1.4657	1.4657	1.4657	1.464	0.002	462.05	35.895	12	12.07	12.08	0.9942	0.993377	2002	JPCRBU	J. Phys. Chem. Ref. Data	31	931
535	RbRh(SO4)2 · 12H2O		1.5004	1.5004	1.5004	1.5004	1.492	0.008	467	39.007	12	12.44	12.55	0.96463	0.956175	1901	ZAACAB	Z. Anorg. Allg. Chem.	27	62
536	RbRh(SO4)2 · 12H2O		1.5004	1.5004	1.5004	1.5004	1.49	0.01	469	39.174	12	12.54	12.65	0.956938	0.948617	1901	ZAACAB	Z. Anorg. Allg. Chem.	27	6
537	RbIn(SO4)2 · 12H2O		1.4637	1.4637	1.4637	1.4637	1.461	0.003	479.66	37.1	12	12.15	12.26	0.987654	0.978793	2002	JPCRBU	J. Phys. Chem. Ref. Data	31	931
538	CsAl(SO4)2 · 12H2O		1.4585	1.4585	1.4585	1.4585	1.453	0.006	471.94	36.089	12	12.27	12.13	0.977995	0.989283	2002	JPCRBU	J. Phys. Chem. Ref. Data	31	931
539	CsTi3+(SO4)2 · 12H2O		1.4736	1.4736	1.4736	1.4736	1.482	-0.008	482.44	38.121	12	11.54	11.41	1.03986	1.05171	1931	REF-W1	REF-W1*	2	260
540	CsV3+(SO4)2 · 12H2O		1.478	1.478	1.478	1.478	1.476	0.002	480.59	38.331	12	12.09	11.96	0.992556	1.00334	1931	REF-W1	REF-W1*	2	260
541	CsCr(SO4)2 · 12H2O		1.4809	1.4809	1.4809	1.4809	1.48	0.001	477.23	38.297	12	12.04	11.91	0.996678	1.00756	2002	JPCRBU	J. Phys. Chem. Ref. Data	31	931
542	CsFe(SO4)2 · 12H2O		1.4836	1.4836	1.4836	1.4836	1.487	-0.003	480.59	38.785	12	11.81	11.68	1.01609	1.0274	2002	JPCRBU	J. Phys. Chem. Ref. Data	31	931
543	CsGa(SO4)2 · 12H2O		1.4648	1.4648	1.4648	1.4648	1.462	0.003	476.72	36.961	12	12.16	11.94	0.986842	1.00503	2002	JPCRBU	J. Phys. Chem. Ref. Data	31	931
544	CsRh(SO4)2 · 12H2O		1.5077	1.5077	1.5077	1.5077	1.498	0.01	471.71	39.979	12	12.49	12.36	0.960769	0.970874	1931	REF-W1	REF-W1*	2	260
545	CsIn(SO4)2 · 12H2O		1.4652	1.4652	1.4652	1.4652	1.46	0.005	492.39	38.21	12	12.28	12.15	0.977199	0.987654	2002	JPCRBU	J. Phys. Chem. Ref. Data	31	931
546	(NH4)Al(SO4)2 · 12H2O	tschermigite	1.4594	1.4594	1.4594	1.4594	1.456	0.003	458.67	35.145	12	12.15	12.16	0.987654	0.986842	2004	LPLABC	Laser Phys. Lett.	1	205
547	(NH4)Cr(SO4)2 · 12H2O		1.4842	1.4842	1.4842	1.4842	1.489	-0.005	459.46	37.125	12	11.78	11.8	1.01868	1.01695	1956	RFNBSC	RFNBSC*	6	7
548	(NH4)Fe(SO4)2 · 12H2O	lonecreekite	1.4848	1.4848	1.4848	1.4848	1.492	-0.007	466.69	37.759	12	11.64	11.66	1.03093	1.02916	1956	RFNBSC	RFNBSC*	6	10
549	(NH4)Ga(SO4)2 · 12H2O		1.4684	1.4684	1.4684	1.4684	1.467	0.001	461.48	36.06	12	12.07	12	0.9942	1	1956	RFNBSC	RFNBSC*	6	9
550	Ca3.06Sr0.06Na6.84K0.04(SO4)6(OH)0.88F0.12Cl0.12 · 0.88H2O	cesanite	1.570	1.570	1.564	1.568	1.559	0.009	532.95	50.545	0.88	1.56	1.76	0.564103	0.5	1981	MNLMBB	Mineral. Mag.	44	269
551	Ca2.92Sr0.06Na6.98K0.04(SO4)6(OH)0.88Cl0.12 · H2O	cesanite	1.570	1.570	1.564	1.568	1.565	0.003	531.77	50.433	1	1.33	1.53	0.75188	0.653595	2002	AMMIAY	Am. Miner.	87	715
552	Na2Fe3+(SO4)2(OH) · 3H2O	sideronatrite	1.508	1.525	1.586	1.5397	1.545	-0.005	265.38	23.914	3	2.85	2.94	1.05263	1.02041	1981	TTMMDZ	TMPM. Tschermaks Mineral. Petrogr. Mitteil.	28	315
553	Na1.54Zn3.39SO4(OH)6Cl · 6H2O	gordaite	1.5607	1.5607	1.5382	1.5532	1.549	0.004	393.77	36.373	6	6.2	6.27	0.967742	0.956938	1997	NJMMAW	Neues Jahrb. Mineral., Monatsh.	1997	155
554	KMgSO4Cl · 2.75H2O	kainite	1.4950	1.5082	1.5202	1.5078	1.519	-0.011	189.93	16.1	2.75	2.51	2.5	1.09562	1.1	1932	XDIGAS	U.S. Geol. Surv. Bull.	833	38
555	K2.89Na0.07Ti0.98Fe3+0.97O0.72(S0.99P0.01O4)4(OH)0.28 · 2H2O	alcaparrosaite	1.643	1.655	1.680	1.6593	1.667	-0.008	385.5	42.383	2	1.81	1.86	1.10497	1.07527	2012	MNLMBB	Mineral. Mag.	76	851
556	[(NH4)8.76Na0.22K0.02]Al1.65Fe3+1.35(SO4)8(OH)1.98 · 4H2O	huizingite-(Al)	1.543	1.545	1.563	1.5503	1.55	0	948.73	87.182	4	4.05	4.5	0.987654	0.888889	2016	AMMIAY	Am. Miner.	101	2095
557	Mg0.81Mn0.07Fe0.04Zn0.04Al1.01(SO4)2F · 17H2O	wilcoxite	1.427	1.438	1.439	1.4347	1.438	-0.003	579.6	41.99	17	16.79	16.77	1.01251	1.01371	2013	CAMIA6	Can. Mineral.	51	107
558	Mg6(H3O)3Fe15(SO4)21(OH)18 · 98H2O	slavíkite	1.531	1.531	1.495	1.519	1.525	-0.006	4426	383.509	98	95.08	94.99	1.03071	1.03169	2010	AMMIAY	Am. Miner.	95	11
559	Mg5.6Mn3.31Zn4.22(SO4)2(OH)22 · 8H2O	torreyite	1.570	1.584	1.585	1.5797	1.576	0.004	809.71	78.366	8	8.35	8.36	0.958084	0.956938	1929	AMMIAY	Am. Miner.	14	165
560	Mg0.98Fe0.09Fe3+4.19(SO4)6(OH)2 · 20H2O	magnesiocopiapite	1.510	1.535	1.575	1.54	1.551	-0.011	984.37	88.757	20	18.8	18.78	1.06383	1.06496	1951	REF-P2	REF-P2*	II	623
561	MgFe3+(SO4)2(OH) · 7H2O	botryogen	1.523	1.530	1.582	1.545	1.544	0.001	330.37	30.064	7	7.03	7.01	0.995733	0.998573	1938	AMMIAY	Am. Miner.	23	749
562	Mg9Zn4Mn2(SO4)2(OH)26 · 8H2O	mooreite	1.533	1.545	1.547	1.5417	1.541	0.001	929.25	84.046	8	8.07	8.03	0.991326	0.996264	1929	AMMIAY	Am. Miner.	14	165
563	Ca6Al2(SO4)3(OH)12 · 26H2O	ettringite	1.4655	1.4655	1.4618	1.4643	1.467	-0.003	1172.67	90.816	26	25.67	25.47	1.01286	1.02081	1962	REFL8	REFL8*	II	107
564	Ca6Al2(SO4)3(OH)12 · 26H2O	ettringite	1.464	1.464	1.458	1.462	1.464	-0.002	1179.26	90.875	26	25.7	25.49	1.01167	1.02001	1951	REF-P2	REF-P2*	II	589
565	Ca5.88Cr1.61Al0.32Fe3+0.02(SO4)3(OH)12 · 26H2O	bentorite	1.478	1.478	1.484	1.48	1.489	-0.009	1157.71	92.726	26	24.83	24.65	1.04712	1.05477	1981	AMMIAY	Am. Miner.	66	639
566	CaCu4(SO4)2 (OH)6· 3H2O	devilline	1.585	1.649	1.660	1.6313	1.644	-0.013	346.43	36.492	3	2.49	2.49	1.20482	1.20482	1983	NJMMAW	Neues Jahrb. Mineral., Monatsh.	1983	79
567	CaCu2.96Zn1.12(SO4)2(OH)6 · 3H2O	serpierite	1.584	1.642	1.647	1.6243	1.64	-0.016	347.72	36.227	3	2.37	2.38	1.26582	1.2605	1951	REF-P2	REF-P2*	II	592
568	Ca3Ge(SO4)2(OH)6 · 3H2O	schaurteite	1.569	1.569	1.581	1.573	1.579	-0.006	339.95	32.524	3	2.76	2.63	1.08696	1.14068	1968	AMMIAY	Am. Miner.	53	507
569	Ca3Ge(SO4)2(OH)6 · 3H2O	schaurteite	1.569	1.569	1.581	1.573	1.579	-0.006	339.95	32.524	3	2.76	2.63	1.08696	1.14068	1968	AMMIAY	Am. Miner.	53	507
570	Mn6.21Mg2.79Zn4(SO4)2(OH)22 · 8H2O	lawsonbauerite	1.590	1.608	1.611	1.603	1.594	0.009	827.07	83.249	8	8.87	8.92	0.901917	0.896861	1982	AMMIAY	Am. Miner.	67	1029
571	FeSO4(OH) · 2H2O	butlerite	1.587	1.678	1.749	1.6713	1.671	0	132.75	14.856	2	2	2	1	1	2002	JPCRBU	J. Phys. Chem. Ref. Data	31	931
572	FeSO4(OH) · 2H2O	butlerite	1.587	1.678	1.749	1.6713	1.671	0	132.75	14.856	2	2	2	1	1	2002	JPCRBU	J. Phys. Chem. Ref. Data	31	931
573	CuAl(SO4)2Cl · 14H2O	aubertite	1.462	1.482	1.495	1.4797	1.487	-0.007	512.44	41.015	14	13.58	13.56	1.03093	1.03245	1978	BUFCAE	Bull. Soc. Fr. Miner. Crist.	102	348
574	Cu6(OH)10SO4 · H2O	redgillite	1.693	1.721	1.723	1.7123	1.705	0.007	320.1	37.959	1	1.26	1.22	0.793651	0.819672	2005	MNLMBB	Mineral. Mag.	69	973
575	Cu4SO4(OH)6 · H2O	posnjakite	1.625	1.680	1.706	1.6703	1.674	-0.004	233.03	26.04	1	0.91	0.88	1.0989	1.13636	1984	BULMD9	Bull. Mineral.	107	641
576	Cu4SO4(OH)6 · 2H2O	langite	1.650	1.700	1.715	1.6883	1.688	0	240.71	27.605	2	2.01	1.98	0.995025	1.0101	1984	BULMD9	Bull. Mineral.	107	641
577	Cu4SO4(OH)6 · 2H2O	langite	1.647	1.710	1.721	1.6927	1.686	0.007	241.41	27.856	2	2.18	2.15	0.917431	0.930233	1982	NJMMAW	Neues Jahrb. Mineral., Monatsh.	1982	16
578	Cu4SO4(OH)6 · 2H2O	langite	1.647	1.695	1.718	1.6867	1.686	0.001	241.41	27.62	2	2.02	1.99	0.990099	1.00503	1982	NJMMAW	Neues Jahrb. Mineral., Monatsh.	1982	16
579	Cu4SO4(OH)6 · 2H2O	wroewolfeite	1.637	1.682	1.694	1.671	1.679	-0.008	244.23	27.318	2	1.79	1.76	1.11732	1.13636	1975	MNLMBB	Mineral. Mag.	40	1
580	Cu4Al2SO4(OH)12 · 2H2O	cyanotrichite	1.591	1.620	1.654	1.6217	1.624	-0.002	371.54	38.545	2	1.9	1.85	1.05263	1.08108	1962	REFL8	REFL8*	II	205
581	Cu6AlSO4Cl(OH)12 · 3H2O	spangolite	1.694	1.694	1.641	1.6763	1.678	-0.002	423.4	47.728	3	2.9	2.84	1.03448	1.05634	1993	AMMIAY	Am. Miner.	78	649
582	Cu6AlSO4Cl(OH)12 · 3H2O	spangolite	1.681	1.681	1.627	1.663	1.665	-0.002	423.4	46.804	3	2.9	2.84	1.03448	1.05634	1951	REF-P2	REF-P2*	II	576
583	CuAl4SO4(OH)12 · 3H2O	chalcoalumite	1.523	1.525	1.532	1.5267	1.518	0.009	388.37	34.151	3	3.39	3.33	0.884956	0.900901	1925	AMMIAY	Am. Miner.	10	79
584	Cu4.96Fe0.03Zn0.01(SO4)2(OH)6 · 4H2O	kobyashevite	1.602	1.666	1.679	1.649	1.656	-0.007	359.87	38.954	4	3.73	3.69	1.07239	1.08401	2013	MIPEE9	Mineral. Petrol.	107	201
585	CuFe3+0.88Al0.12(SO4)2(OH) · 4H2O	guildite	1.622	1.628	1.681	1.6437	1.641	0.003	244.54	26.256	4	4.07	4.06	0.982801	0.985222	1970	AMMIAY	Am. Miner.	55	502
586	CuFe3+4(SO4)6(OH)2 · 20H2O	cuprocopiapite	1.558	1.575	1.620	1.5843	1.582	0.002	937.75	91.485	20	20.23	20.21	0.988631	0.989609	1951	REF-P2	REF-P2*	II	623
587	CuFe3+4(SO4)6(OH)2 · 20H2O	cuprocopiapite	1.558	1.575	1.620	1.5843	1.582	0.002	937.75	91.485	20	20.23	20.21	0.988631	0.989609	1951	REF-P2	REF-P2*	II	623
588	Cu5.77Zn1.21Ni0.10Co0.09(SO4)2(OH)10 · 3H2O	schulenbergite	1.707	1.707	1.666	1.6933	1.704	-0.011	414.89	47.919	3	2.49	2.44	1.20482	1.22951	1995	AMMIAY	Am. Miner.	80	849
589	Cu3.62Zn0.39Mn(SO4)2(OH)6 · 4H2O	campigliaite	1.589	1.645	1.659	1.631	1.64	-0.009	366.12	38.546	4	3.64	3.62	1.0989	1.10497	1997	REF-G	REF-G*	8	647
590	Cu10.3Zn3.6(SO4)4(OH)22 · 6H2O	ramsbeckite	1.635	1.675	1.680	1.6633	1.663	0	889.82	98.412	6	6	5.92	1	1.01351	1989	EJMIER	Eur. J. Mineral.	1	147
591	Cu10.4Zn3.6(SO4)4(OH)22 · 6H2O	ramsbeckite	1.635	1.675	1.680	1.6633	1.666	-0.003	888.66	98.284	6	5.73	5.66	1.04712	1.06007	1985	NJMMAW	Neues Jahrb. Mineral., Monatsh.	1985	550
592	Cu10.97Zn4.2(SO4)4(OH)22 · 6H2O	ramsbeckite	1.669	1.703	1.707	1.693	1.682	0.011	893.78	103.181	6	7.16	7.08	0.837989	0.847458	1989	EJMIER	Eur. J. Mineral.	1	147
593	Cu3.40Zn1.46(SO4)2(OH)6 · 6H2O	ktenasite	1.574	1.615	1.628	1.6057	1.619	-0.013	814.66	82.36	12	10.76	10.69	1.11524	1.12254	1977	MNLMBB	Mineral. Mag.	41	65
594	Cu4.3Cd0.96(SO4)2(OH)6 · 4H2O	niedermayrite	1.609	1.642	1.661	1.6373	1.655	-0.018	370.35	39.378	4	3.26	3.23	1.22699	1.23839	1998	MIPEE9	Mineral. Petrol.	63	19
595	Zn0.64Mg0.27Mn0.11Fe3+(SO4)2(OH) · 7H2O	zincobotryogen	1.542	1.551	1.587	1.56	1.563	-0.003	330.37	30.892	7	6.9	6.89	1.01449	1.01597	1964	AMMIAY	Am. Miner.	49	1777
596	Zn0.82Fe0.08Mn0.06Ca0.04Fe3+4(SO4)6(OH)2 · 18H2O	zincocopiapite	1.534	1.554	1.586	1.558	1.562	-0.004	934.64	87.083	18	17.63	17.62	1.02099	1.02157	1964	AMMIAY	Am. Miner.	49	1777
597	Zn0.97Fe3+4.03(SO4)6(OH)2 · 18H2O	zincocopiapite	1.532	1.540	1.592	1.5547	1.555	0	945.8	87.597	18	17.92	17.91	1.00446	1.00503	1964	AMMIAY	Am. Miner.	49	1777
598	(Zn0.65Ni0.29Cu0.04Fe0.02)Al4Si0.03(SO4)0.99(OH)12.12 · 2.81H2O	kyrgyzstanite	1.517	1.525	1.527	1.523	1.521	0.002	389	33.967	2.81	2.88	2.82	0.975694	0.996454	2005	NDMIDF	Nov. Dannye Miner.	40	23
599	Zn3.75Cu0.25SO4(OH)6 · 5H2O	osakaite	1.532	1.565	1.567	1.5547	1.555	0	331.05	30.661	5	5	4.97	1	1.00604	2007	CAMIA6	Can. Mineral.	45	1511
600	Zn2.82Cu1.48(SO4)2(OH)6 · 4H2O	christelite	1.598	1.626	1.635	1.6197	1.615	0.005	358.15	37.037	4	4.74	4.71	0.843882	0.849257	1997	AMMIAY	Am. Miner.	82	207
601	Al4SO4(OH)10 · 4H2O	felsőbányaite	1.516	1.518	1.533	1.5223	1.521	0.001	351.2	30.627	4	4.05	3.99	0.987654	1.00251	1951	REF-P2	REF-P2*	II	585
602	AlSO4(OH) · 5H2O	jurbanite	1.459	1.473	1.483	1.4717	1.471	0.001	208.98	16.445	5	5.01	4.99	0.998004	1.002	1976	AMMIAY	Am. Miner.	61	1
603	Al2SO4(OH)4 · 7H2O	aluminite	1.459	1.464	1.470	1.4643	1.466	-0.002	318.3	24.654	7	6.93	6.9	1.0101	1.01449	1951	REF-P2	REF-P2*	II	600
604	Al1.96Fe3+0.06(SO4)(OH)3.12Cl0.98 · 6H2O	vendidaite	1.522	1.524	1.527	1.5243	1.521	0.003	290.85	25.462	6	6.1	6.08	0.983607	0.986842	2013	CAMIA6	Can. Mineral.	51	559
605	Al0.88Fe0.70Cu0.16Na0.05Fe3+3.64(SO4)6(OH)2 · 20H2O	aluminocopiapite	1.525	1.543	1.590	1.5527	1.55	0.003	979.95	90.433	20	20.3	20.28	0.985222	0.986193	1947	UTSGAL	Univ. Toronto Stud. Geol. Ser.	51	21
606	Al0.87Fe0.70Cu0.16Na0.05Fe3+3.64(SO4)6(OH)2 · 20H2O	aluminocopiapite	1.525	1.543	1.590	1.5527	1.547	0.006	984.94	90.893	20	20.59	20.57	0.971345	0.97229	1947	UTSGAL	Univ. Toronto Stud. Geol. Ser.	51	21
607	Fe3+SO4Cl · 6H2O	xitieshanite	1.536	1.570	1.628	1.578	1.579	-0.001	242.64	23.416	6	5.97	5.97	1.00503	1.00503	1984	AMMIAY	Am. Miner.	69	1194
608	Fe3+SO4(OH) · 2H2O	parabutlerite	1.598	1.663	1.737	1.666	1.665	0.001	134.07	14.886	2	2.02	2.01	0.990099	0.995025	1938	AMMIAY	Am. Miner.	23	669
609	Fe3+SO4(OH) · 5H2O	fibroferrite	1.532	1.532	1.570	1.5447	1.552	-0.007	215.31	19.582	5	4.82	4.82	1.03734	1.03734	1951	REF-P2	REF-P2*	II	615
610	Fe3+4.67(SO4)6(OH)2 · 20H2O	ferricopiapite	1.531	1.546	1.597	1.558	1.571	-0.013	958.8	89.335	20	18.59	18.58	1.07585	1.07643	1922	JACSAT	J. Am. Chem. Soc.	44	1965
611	Fe3+4.67(SO4)6(OH)2 · 20H2O	ferricopiapite	1.531	1.546	1.597	1.558	1.574	-0.016	954.4	88.925	20	18.33	18.32	1.09111	1.0917	2006	EJMIER	Eur. J. Mineral.	18	175
612	K3Na7Mg2(SO4)6(NO3)2 · 6H2O	humberstonite	1.474	1.474	1.436	1.4613	1.475	-0.014	837.53	64.447	6	4.65	4.6	1.29032	1.30435	1970	AMMIAY	Am. Miner.	55	1518
613	K3Na8Fe3+(SO4)6(NO3)2 · 6H2O	ungemachite	1.502	1.502	1.449	1.4843	1.487	-0.003	856.73	69.245	6	5.72	5.73	1.04895	1.04712	1938	AMMIAY	Am. Miner.	23	314
614	Ca2(SO4)(CO3) · 4H2O	rapidcreekite	1.516	1.518	1.531	1.5217	1.537	-0.015	229.87	20.021	4	3.61	3.54	1.10803	1.12994	1996	CAMIA6	Can. Mineral.	34	99
615	Ca3Si(SO4)(CO3)(OH)6 · 12H2O	thaumasite	1.498	1.498	1.458	1.4847	1.491	-0.006	545.05	44.084	12	11.64	11.49	1.03093	1.04439	1986	TTMMDZ	TMPM. Tschermaks Mineral. Petrogr. Mitteil.	35	149
616	Ca6Fe3+1.5Al0.3Mn0.2(SO4)2.3[B(OH)4]1.2(OH)12 · 26H2O	sturmanite	1.500	1.500	1.505	1.5017	1.51	-0.008	1175.1	98.402	26	25	24.77	1.04	1.04966	1983	CAMIA6	Can. Mineral.	21	705
617	Ca3Ge(OH)6(SO4)(CO3) · 12H2O	carraraite	1.509	1.509	1.479	1.499	1.496	0.003	562.57	46.857	12	12.2	12.08	0.983607	0.993377	2001	AMMIAY	Am. Miner.	86	1293
618	Cu7.77Ni0.23Mn0.02(SO4)4(CO3)(OH)6 · 48H2O	nakauriite	1.585	1.604	1.612	1.6003	1.594	0.006	1356.72	135.962	48	48.92	48.87	0.981194	0.982198	1977	AMMIAY	Am. Miner.	62	593
619	Mg(ClO4)2 · 6H2O		1.482	1.482	1.458	1.474	1.476	-0.002	276.37	21.856	6	5.95	5.94	1.0084	1.0101	1964	REF-W2	REF-W2*	1	111
620	Ba(ClO4)2 · 3H2O		1.5330	1.5330	1.5323	1.5328	1.526	0.007	221.41	19.696	3	3.17	2.99	0.946372	1.00334	1931	ZEKRDZ	Z. Kristallogr.	77A	84
621	Co(ClO4)2 · 6H2O		1.512	1.512	1.492	1.5053	1.498	0.007	276.28	23.306	6	6.21	6.2	0.966184	0.967742	1964	RFNBSM	RFNBSM*	3	28
622	Cu(ClO4)2 · 6H2O		1.505	1.505	1.522	1.5107	1.516	-0.005	272.59	23.239	6	5.84	5.83	1.0274	1.02916	1964	REF-W2	REF-W2*	1	112
623	Zn(ClO4)2 · 6H2O		1.508	1.508	1.487	1.501	1.51	-0.009	269.07	22.502	6	5.71	5.71	1.05079	1.05079	1964	REF-W2	REF-W2*	1	112
624	Cd(ClO4)2 · 6H2O		1.489	1.489	1.480	1.486	1.49	-0.004	294.39	23.876	6	69.21	69.21	0.0866927	0.0866927	1964	REF-W2	REF-W2*	1	112
625	Na4Mg(V10O28) · 24H2O	huemulite	1.679	1.734	1.742	1.7183	1.696	0.022	1040.67	124.418	24	29.49	24.16	0.813835	0.993377	1966	AMMIAY	Am. Miner.	51	1
626	Mg(V2O6) · 7H2O	dickthomssenite	1.6124	1.6740	1.7104	1.6656	1.627	0.039	284	31.515	7	65.5	65.2	0.10687	0.107362	2001	CAMIA6	Can. Mineral.	39	1691
627	Ca4.3Mg0.2Fe3+0.2Al[(V4+2V5+11.8)O40] · 28H2O	sherwoodite	1.765	1.765	1.735	1.755	1.733	0.022	1334.58	167.445	28	31.23	24.49	0.896574	1.14332	1958	AMMIAY	Am. Miner.	43	749
628	CaSr(V2O6)(OH)2 · 3H2O	delrioite	1.783	1.834	1.866	1.8277	1.814	0.014	217.29	29.773	3	3.42	2.99	0.877193	1.00334	1959	AMMIAY	Am. Miner.	44	261
629	Ni0.77Zn0.19Cu0.03Fe0.01Al4(V2O6)(OH)12 · 2H2O	ankinovichite	1.653	1.677	1.706	1.6787	1.661	0.018	404.2	45.717	2	2.83	3.08	0.706714	0.649351	2005	AMMIAY	Am. Miner.	90	768
630	Zn2.66Co0.15Ca0.05(V2O7)(OH)2 · 2H2O	martyite	1.797	1.797	1.806	1.8	1.823	-0.023	229.97	30.505	2	1.43	1.72	1.3986	1.16279	2008	CAMIA6	Can. Mineral.	46	687
631	Na2CrO4 · 4H2O		1.564	1.568	1.590	1.574	1.576	-0.002	203.52	19.505	4	3.95	4.04	1.01266	0.990099	1971	RFNBSM	RFNBSM*	9	50
632	Rb2Mg(CrO4)2 · 6H2O		1.6224	1.6338	1.6444	1.6335	1.634	0	359.98	38.05	6	5.97	5.98	1.00503	1.00334	1912	MNLMBB	Mineral. Mag.	16	175
633	Cs2Mg(CrO4)2 · 6H2O		1.6376	1.6432	1.6555	1.6454	1.645	0	381.95	41.122	6	6	6.31	1	0.950872	1912	MNLMBB	Mineral. Mag.	16	175
634	(NH4)2Mg(CrO4)2 · 6H2O		1.637	1.638	1.653	1.6427	1.639	0.004	361.5	38.755	6	6.16	6.06	0.974026	0.990099	1970	RFNBSM	RFNBSM*	8	10
635	SrCr2O7 · 3H2O		1.7146	1.7174	1.812	1.748	1.788	-0.04	222.11	27.618	3	2.04	2.01	1.47059	1.49254	1931	REF-W1	REF-W1*	2	266
636	Be2AsO4(OH) · 4H2O	bearsite	1.490	1.502	1.502	1.498	1.504	-0.006	196.44	16.329	4	3.87	3.87	1.03359	1.03359	1963	AMMIAY	Am. Miner.	48	210
637	NaFe3+2Mg0.656Mn0.346(AsO4)3 · H2O	yazganite	1.870	1.897	1.900	1.889	1.884	0.005	239.3	35.08	1	1.14	1.18	0.877193	0.847458	2005	EJMIER	Eur. J. Mineral.	17	367
638	Na0.87Cu5.17Ti0.90Sb5+1.15O2[As0.98O4]4[As5+0.98O3(OH)]2 · 8H2O	braithwaiteite	1.698	1.757	1.783	1.746	1.747	-0.001	679.76	84.304	8	7.92	7.96	1.0101	1.00503	2009	CAMIA6	Can. Mineral.	47	947
639	NaH2AsO4 · H2O		1.5382	1.5535	1.5607	1.5508	1.546	0.005	113.09	10.401	1	1.06	1.11	0.943396	0.900901	1987	BUFCAE	Bull. Soc. Fr. Miner. Crist.	10	76
640	Na3.25AsO4(OH)0.25 · 12H2O		1.4567	1.4567	1.4662	1.4599	1.448	0.012	399.66	30.654	12	12.5	12.65	0.96	0.948617	1987	BUFCAE	Bull. Soc. Fr. Miner. Crist.	10	76
641	Na3.25AsO4(OH)0.25 · 12H2O		1.4589	1.4589	1.4669	1.4616	1.448	0.014	399.66	30.769	12	12.58	12.73	0.953895	0.942655	1931	REF-W1	REF-W1*	2	269
642	K1.03(Cd0.61Ca0.30Mn0.11)(Cu2+4.85Zn0.03)(AsO4)4.04[As(OH)2O2] · 2H2O	andyrobertsite	1.720	1.749	1.757	1.742	1.734	0.008	481.3	59.381	2	2.42	2.47	0.826446	0.809717	1999	MRECA7	Mineral. Rec.	30	181
643	K1.27Ca0.84Cu5(AsO4)4[As(OH)2O2] · 2H2O	calcioandyrobertsite	1.715	1.730	1.735	1.7267	1.71	0.017	493.61	59.679	2	2.89	3.19	0.692042	0.626959	2004	EJMIER	Eur. J. Mineral.	16	163
644	K1.01(Cd0.12Ca0.74Mn0.14)(Cu4.85Zn0.01)(AsO4)4.06[As(OH)2O2] · 2H2O	calcioandyrobertsite	1.7130	1.7430	1.7490	1.735	1.73	0.005	481.3	58.839	2	2.31	2.42	0.865801	0.826446	1999	MRECA7	Mineral. Rec.	30	181
645	Mg3(AsO4)2 · 8H2O	hörnesite	1.563	1.571	1.596	1.5767	1.587	-0.01	315.82	30.408	8	7.64	7.62	1.04712	1.04987	1921	BUGMAF	Geol. Soc. Amer. Bull.	679	86
646	Mg0.92Ca0.04AsO3OH · 4H2O	brassite	1.531	1.546	1.562	1.5463	1.54	0.006	168.71	15.391	4	4.11	4.11	0.973236	0.973236	1973	BUFCAE	Bull. Soc. Fr. Miner. Crist.	96	365
647	Mg0.94Cu0.03Mn0.02Ca0.01(AsO3OH) · H2O	magnesiokoritnigite	1.579	1.586	1.620	1.595	1.603	-0.008	102.63	10.194	1	0.91	0.9	1.0989	1.11111	2013	MNLMBB	Mineral. Mag.	77	3081
648	Mg3.4Zn1.6(AsO4)2(AsO3OH)2 · 10H2O	chudobaite	1.583	1.608	1.633	1.608	1.606	0.002	526.76	53.458	10	10.11	10.07	0.98912	0.993049	1960	NJMMAW	Neues Jahrb. Mineral., Monatsh.	1960	1
649	Ca(AsO3OH) · H2O	haidingerite	1.590	1.602	1.638	1.61	1.617	-0.007	110.67	11.268	1	0.91	0.95	1.0989	1.05263	2016	REF-A	REF-A*	1.2	H
650	Ca(AsO3OH) · 2H2O	pharmacolite	1.583	1.589	1.594	1.5887	1.585	0.004	131.38	12.912	2	2.05	2.02	0.97561	0.990099	2016	REF-A	REF-A*	1.2	P
651	Ca5As4O14(OH)2 · 4H2O	sainfeldite	1.600	1.610	1.616	1.6087	1.617	-0.008	466.36	47.379	4	3.56	4.15	1.1236	0.963855	1964	BUFCAE	Bull. Soc. Fr. Miner. Crist.	87	169
652	Ca5As4O14(OH)2 · 9H2O	guérinite	1.574	1.582	1.582	1.5793	1.595	-0.016	557.24	53.9	9	8.06	8.18	1.11663	1.10024	1962	AMMIAY	Am. Miner.	47	416
653	Ca5As4O14(OH)2 · 9H2O	ferrarisite	1.562	1.572	1.585	1.573	1.566	0.007	588.9	56.342	9	9.44	9.7	0.95339	0.927835	1980	BULMD9	Bull. Mineral.	103	533
654	Ca3(AsO4)2 · 10H2O	rauenthalite	1.540	1.552	1.570	1.554	1.551	0.003	406.37	37.592	10	10.15	10.19	0.985222	0.981354	1964	BUFCAE	Bull. Soc. Fr. Miner. Crist.	87	169
655	Ca3(AsO4)2 · 11H2O	phaunouxite	1.532	1.542	1.556	1.5433	1.537	0.006	435.4	39.501	11	11.32	11.36	0.971731	0.96831	1982	BULMD9	Bull. Mineral.	105	327
656	Ca4(AsO4)2(AsO3OH) · 4H2O	vladimirite	1.660	1.663	1.665	1.6627	1.665	-0.002	336.41	37.169	4	3.93	4.01	1.01781	0.997506	2011	CAMIA6	Can. Mineral.	49	1055
657	Ca2Mg0.97Ni0.06(AsO4)2 · 1.84H2O	talmessite	1.672	1.685	1.698	1.685	1.696	-0.011	199.4	22.759	2	1.75	1.68	1.14286	1.19048	1965	AMMIAY	Am. Miner.	50	813
658	Ca2Mg0.82Co0.15(AsO4)2 · 2H2O	wendwilsonite	1.694	1.703	1.713	1.7033	1.702	0.001	200.5	23.483	2	2.03	2.1	0.985222	0.952381	1987	AMMIAY	Am. Miner.	72	217
659	Ca4Mg(AsO4)2(AsO3OH)2 · 11H2O	picropharmacolite	1.566	1.571	1.578	1.5717	1.576	-0.004	600.06	57.276	11	10.7	10.92	1.02804	1.00733	1961	BUFCAE	Bull. Soc. Fr. Miner. Crist.	84	391
660	CaMn(AsO3OH)2 · 2H2O	fluckite	1.618	1.627	1.642	1.629	1.637	-0.008	219.21	23.007	2	1.79	1.92	1.11732	1.04167	1980	BULMD9	Bull. Mineral.	103	122
661	Ca2Mn0.95Mg0.05(AsO4)2 · 2H2O	brandtite	1.709	1.711	1.724	1.7147	1.716	-0.001	205.5	24.447	2	1.97	1.92	1.01523	1.04167	1921	BUGMAF	Geol. Soc. Amer. Bull.	679	50
662	Ca1.94Mn0.06Mn0.84Mg0.09Zn0.04Fe0.01As1.93O7.83 · 2H2O	parabrandtite	1.701	1.721	1.751	1.7243	1.724	0	202.3	24.383	2	2.01	1.95	0.995025	1.02564	1987	NJMIAK	N. Jb. Mineral. Abh.	157	113
663	Ca2Mn3.09Fe0.92Mg0.56Al0.06Li0.04Be4(AsO4)6(OH)4 · 6H2O	okruschite	1.671	1.682	1.687	1.68	1.678	0.002	678.5	76.89	6	6.17	6.26	0.972447	0.958466	2014	EJMIER	Eur. J. Mineral.	26	589
664	Ca2Co0.515Mg0.485(AsO4)2 · 2H2O	roselite	1.725	1.728	1.735	1.7293	1.714	0.015	200.5	24.328	2	2.34	2.41	0.854701	0.829876	1977	CAMIA6	Can. Mineral.	15	36
665	Ca2Co0.78Mg0.20Ni0.08Fe0.02(AsO4)2 · 2H2O	roselite-beta	1.723	1.737	1.756	1.7387	1.73	0.009	200.04	24.573	2	2.2	2.27	0.909091	0.881057	1955	AMMIAY	Am. Miner.	40	828
666	Ca2Zn0.90Mn0.06Mg0.05Fe0.01(AsO4)2 · 2H2O	zincroselite	1.707	1.710	1.720	1.7123	1.724	-0.012	202.15	23.972	2	1.73	1.8	1.15607	1.11111	1986	NJMMAW	Neues Jahrb. Mineral., Monatsh.	1986	523
667	Ca2Ni0.77Mg0.13Co0.06(AsO4)2 · 2H2O	nickeltalmessite	1.715	1.720	1.753	1.7293	1.726	0.003	198.04	24.029	2	2.07	2.01	0.966184	0.995025	2010	GEOOD1	Geol. Ore Deposits	52	606
668	Ca2Cu(AsO4)2 · 2H2O	rruffite	1.725	1.734	1.740	1.733	1.736	-0.003	201.52	24.571	2	1.92	1.85	1.04167	1.08108	2011	CAMIA6	Can. Mineral.	49	877
669	Ca1.98CuAl1.15As2.87O10 (OH)4 · 5H2O	joteite	1.634	1.644	1.651	1.643	1.641	0.002	384.2	41.209	5	5.07	5.01	0.986193	0.998004	2013	MNLMBB	Mineral. Mag.	77	2811
670	Ca2Cu5Sb5+(AsO4)4(OH)6Cl · 6H2O	richelsdorfite	1.640	1.692	1.694	1.6753	1.663	0.012	661.75	74.487	6	6.93	6.97	0.865801	0.860832	1994	SMPTA8	Schweiz. Miner. Petrogr. Mitt.	74	273
671	Ca2.05Cu9(AsO4)4(S0.63O4)0.5(OH)9 · 9H2O	tangdanite	1.666	1.686	1.694	1.682	1.666	0.016	789.35	89.71	9	10.36	10.54	0.868726	0.85389	2014	MNLMBB	Mineral. Mag.	78	559
672	Ca2Cu9(AsO4)4(OH)8(CO3) · 11H2O	tyrolite	1.67	1.686	1.698	1.6847	1.689	-0.004	795.16	90.716	11	10.76	10.81	1.0223	1.01758	1956	BUFCAE	Bull. Soc. Fr. Miner. Crist.	79	7
673	Ca2Zn3.84Cu0.18(AsO4)4 · H2O	prosperite	1.746	1.748	1.768	1.754	1.752	0.002	351.57	44.054	1	1.07	1.01	0.934579	0.990099	1981	ZEKRDZ	Z. Kristallogr.	156	70
674	CaZn1.91Cu0.09(AsO4)2 · 0.5H2O	prosperite	1.746	1.748	1.768	1.754	1.751	0.003	176.01	22.055	0.5	0.56	0.53	0.892857	0.943396	1979	CAMIA6	Can. Mineral.	17	87
675	Ca0.96Zn1.07Mn0.81Fe0.16(AsO4)2(OH) · H2O	lotharmeyerite	1.797	1.804	1.815	1.8053	1.831	-0.026	189.16	25.252	1	0.32	0.28	3.125	3.57143	1984	MRECA7	Mineral. Rec.	15	223
676	Ca0.94Sr0.01Na0.01Mn3+0.90Fe3+0.05Al0.02Mg0.41Zn0.03Ni0.06Co0.01As1.97V0.03O8(OH)1.18 · 0.82H2O	manganlotharmeyerite	1.785	1.814	1.854	1.8177	1.8	0.018	186.49	25.259	0.82	1.19	1.16	0.689076	0.706897	2002	CAMIA6	Can. Mineral.	40	1597
677	CaCo0.97Fe3+0.67Ni0.36(AsO4)2(OH)0.69 · 1.31H2O	cobaltlotharmeyerite	1.78	1.79	1.85	1.8067	1.817	-0.01	188.82	25.246	1.31	1.1	1.06	1.19091	1.23585	1999	NJMMAW	Neues Jahrb. Mineral., Monatsh.	1999	505
678	Ca2Zn0.86Mg0.14Fe0.01Mn0.01(AsO4)2 · 2H2O	gaitite	1.689	1.707	1.727	1.7077	1.725	-0.017	199.15	23.465	2	1.61	1.54	1.24224	1.2987	1980	CAMIA6	Can. Mineral.	18	197
679	Ca1.86Zn0.38Mn0.35Fe3+3.80(AsO4)3.62(OH)5.72 · 5.6H2O	ogdensburgite	1.715	1.783	1.785	1.761	1.767	-0.006	552	69.789	6	5.66	5.59	1.06007	1.07335	1987	AMMIAY	Am. Miner.	72	409
680	Ca0.58Y0.13Ce0.11Nd0.08La0.04K0.02Dy0.02Pr0.01Yb0.01Cu5.9Ca0.14(PO4)2.06(PO3OH)0.65(AsO4)0.22(SiO4)0.22(OH)6 · 3H2O	calciopetersite	1.674	1.674	1.75	1.6993	1.679	0.02	451	52.53	3	4.09	4	0.733496	0.75	2005	CAMIA6	Can. Mineral.	43	1393
681	Mn(AsO3OH) · H2O	krautite	1.620	1.639	1.686	1.6483	1.655	-0.007	107.96	11.674	1	0.92	0.93	1.08696	1.07527	1975	BUFCAE	Bull. Soc. Fr. Miner. Crist.	98	78
682	Mn5(AsO4)2(AsO3OH)2 · 10H2O	geigerite	1.601	1.630	1.660	1.6303	1.629	0.001	560.28	58.927	10	10.1	10.14	0.990099	0.986193	1989	AMMIAY	Am. Miner.	74	676
683	Mn4Mg(AsO4)2(OH)4 · 4H2O	akrochordite	1.672	1.676	1.683	1.677	1.676	0.001	337.45	38.076	4	4.04	4.07	0.990099	0.982801	1930	CERDAA	Chem. Erde	5	41
684	Mn2.69Ca2.07As4O14(OH)2 · 4H2O	villyaellenite	1.660	1.670	1.676	1.6687	1.659	0.01	438.64	48.896	4	4.49	4.76	0.890869	0.840336	1984	SMPTA8	Schweiz. Miner. Petrogr. Mitt.	64	323
685	Mn4.62Zn0.32Ca0.08Fe0.01As4O14(OH)2 · 4H2O	villyaellenite	1.713	1.723	1.729	1.7217	1.726	-0.004	405.09	48.65	4	3.81	3.86	1.04987	1.03627	1988	AMMIAY	Am. Miner.	73	1172
686	Mn4.63Zn0.32Ca0.08(AsO3OH)2(AsO4)2 · 4H2O	miguelromeroite	1.713	1.723	1.729	1.7217	1.725	-0.003	406.1	48.771	4	3.87	3.92	1.03359	1.02041	2009	AMMIAY	Am. Miner.	94	1535
687	Fe3(AsO4)2 · 8H2O	parasymplesite	1.620	1.648	1.685	1.651	1.65	0.001	320.19	34.764	8	8.05	8.05	0.993789	0.993789	1976	CAMIA6	Can. Mineral.	14	437
688	Fe3(AsO4)2 · 8H2O	parasymplesite	1.628	1.660	1.705	1.6643	1.669	-0.005	315	34.89	8	7.85	7.86	1.01911	1.01781	1955	AMMIAY	Am. Miner.	40	368
689	Co0.50Mg0.12Mn0.08Cu0.01Fe3+2.11As1.95P0.04S0.01O8(OH)2 · 4H2O	cobaltarthurite	1.741	1.762	1.797	1.7667	1.751	0.016	275.92	35.135	4	4.44	4.43	0.900901	0.902935	2002	CAMIA6	Can. Mineral.	40	725
690	CoFe3+2(AsO4)2(OH)2 · 4H2O	cobaltarthurite	1.741	1.762	1.797	1.7667	1.757	0.01	276.65	35.228	4	4.31	4.3	0.928074	0.930233	2002	CAMIA6	Can. Mineral.	40	733
691	Co2.01Fe0.74Ni0.25(AsO4)2 · 8H2O	erythrite	1.629	1.663	1.701	1.6643	1.65	0.014	317.2	35.134	8	8.5	8.48	0.941176	0.943396	1951	REF-P2	REF-P2*	II	746
692	Co2Fe0.75Ni0.25(AsO4)2 · 8H2O	erythrite	1.6263	1.6614	1.6986	1.6621	1.65	0.012	317.19	35.016	8	8.42	8.4	0.950119	0.952381	1962	REFL8	REFL8*	II	197
693	Co0.71Zn0.25Cu0.02Ni0.01(AsO3OH) · H2O	cobaltkoritnigite	1.646	1.668	1.705	1.673	1.656	0.017	104.21	11.69	1	1.2	1.19	0.833333	0.840336	1981	NJMMAW	Neues Jahrb. Mineral., Monatsh.	1981	257
694	(Co1.75Ni0.23Ca0.02)(AsO3OH)2 · 5H2O	burgessite	1.596	1.604	1.628	1.6093	1.602	0.007	275.3	27.999	5	5.22	5.2	0.957854	0.961538	2009	CAMIA6	Can. Mineral.	47	159
695	Ni2.48Mg0.50Fe0.02(AsO4)2 · 8H2O	annabergite	1.622	1.658	1.687	1.6557	1.651	0.005	309.15	33.803	8	8.16	8.15	0.980392	0.981595	1951	REF-P2	REF-P2*	II	746
696	Cu(AsO3OH) · H2O	geminite	1.656	1.692	1.770	1.706	1.7	0.006	101.37	11.917	1	1.07	1.07	0.934579	0.934579	1990	SMPTA8	Schweiz. Miner. Petrogr. Mitt.	70	309
697	Cu2AsO4(OH) · 3H2O	euchroite	1.695	1.698	1.733	1.7087	1.701	0.008	161.19	19.019	3	3.13	3.11	0.958466	0.96463	1962	REFL8	REFL8*	II	206
698	Cu2As0.92P0.08O4(OH) · 3H2O	euchroite	1.712	1.703	1.704	1.7063	1.703	0.003	161.19	18.958	3	3.05	3.04	0.983607	0.986842	1956	BUFCAE	Bull. Soc. Fr. Miner. Crist.	29	7
699	Cu3(AsO4)2 · 4H2O	rollandite	1.745	1.755	1.760	1.7533	1.744	0.009	236.22	29.575	3.9	4.14	4.12	0.942029	0.946602	2000	EJMIER	Eur. J. Mineral.	12	1045
700	Cu9.67As3.89Si0.05O15.76(SO4)0.96(OH)5.55 · 8H2O	leogangite	1.590	1.740	1.744	1.6913	1.692	-0.001	718.25	82.722	8	7.91	7.83	1.01138	1.02171	2004	MIPEE9	Mineral. Petrol.	81	187
701	Cu2AlAsO4(OH)4 · 4H2O	liroconite	1.612	1.652	1.675	1.6463	1.644	0.002	237.32	25.585	4	4.06	4.03	0.985222	0.992556	1951	REF-P2	REF-P2*	II	921
702	Cu9Al(AsO4)2(SO4)1.5(OH)12 · 18H2O	chalcophyllite	1.618	1.618	1.552	1.596	1.594	0.002	957.77	95.294	18	18.26	18.19	0.985761	0.989555	1924	AJSCAP	Amer. J. Sci.	7	31
703	CuFe3+2As0.69P0.20S0.11O8(OH)2 · 4H2O	arthurite	1.746	1.774	1.806	1.7753	1.757	0.018	274.98	35.396	4	4.54	4.53	0.881057	0.883002	1978	NJMIAK	N. Jb. Mineral. Abh.	133	291
704	Cu3.94Zn0.06(As1.97P0.03Si0.02) O7.09(OH)3.91 · H2O	domerockite	1.798	1.814	1.817	1.8097	1.83	-0.02	225.25	30.224	1	0.48	0.47	2.08333	2.12766	2013	MNLMBB	Mineral. Mag.	77	509
705	Zn(AsO3OH) · H2O	koritnigite	1.632	1.652	1.693	1.659	1.655	0.004	104.16	11.446	1	1.04	1.04	0.961538	0.961538	1979	TTMMDZ	TMPM. Tschermaks Mineral. Petrogr. Mitteil.	26	51
706	Zn3(AsO4)2 · 2H2O	warikahnite	1.747	1.753	1.768	1.756	1.743	0.013	197.38	24.796	2	2.28	2.27	0.877193	0.881057	1979	NJMMAW	Neues Jahrb. Mineral., Monatsh.	1979	389
707	Zn1.87Fe0.06Mn0.07AsO4(OH) · H2O	legrandite	1.702	1.709	1.740	1.717	1.711	0.006	125.64	14.994	1	1.09	1.09	0.917431	0.917431	1963	AMMIAY	Am. Miner.	48	1258
708	Zn1.973Fe0.004Mn0.012AsO4(OH) · H2O	legrandite	1.702	1.709	1.740	1.717	1.703	0.014	125.51	14.978	1	1.19	1.19	0.840336	0.840336	2013	CAMIA6	Can. Mineral.	51	233
709	Zn1.88Fe0.12Fe3+3.10(AsO4)3(OH)4 · 10H2O	mapimite	1.672	1.678	1.712	1.6873	1.7	-0.013	530.09	60.706	10	9.26	9.24	1.07991	1.08225	1981	BULMD9	Bull. Mineral.	104	582
710	Zn2.44Co0.42Ni0.14(AsO4)2 · 8H2O	köttigite	1.622	1.638	1.671	1.6437	1.649	-0.005	315.08	33.83	8	7.82	7.81	1.02302	1.02433	1951	REF-P2	REF-P2*	II	751
711	Zn2.53Cu0.39(AsO4)2 · 4H2O	davidlloydite	1.671	1.687	1.695	1.6843	1.681	0.003	245.99	28.05	4	4.08	4.09	0.980392	0.977995	2012	MNLMBB	Mineral. Mag.	76	4
712	AlAsO4 · 2H2O	mansfieldite	1.620	1.620	1.640	1.6267	1.637	-0.01	109.6	11.461	2	1.87	1.85	1.06952	1.08108	1948	AMMIAY	Am. Miner.	33	122
713	Al0.9Fe0.1AsO4 · 2H2O	mansfieldite	1.631	1.649	1.663	1.6477	1.661	-0.013	108.75	11.748	2	1.84	1.83	1.08696	1.0929	1963	NJMMAW	Neues Jahrb. Mineral., Monatsh.	1963	79
714	Fe3+AsO4 · 2H2O	scorodite	1.784	1.795	1.814	1.7977	1.792	0.006	114.77	15.194	2	2.08	2.08	0.961538	0.961538	1948	AMMIAY	Am. Miner.	33	122
715	Fe3+AsO4 · 2H2O	scorodite	1.771	1.805	1.820	1.7987	1.784	0.015	115.99	15.361	2	2.18	2.18	0.917431	0.917431	1951	REF-P2	REF-P2*	II	763
716	U4+(AsO3OH)1.82(PO3OH)0.04(SO4)0.13(SiO4)0.01 · 4H2O	štěpite	1.636	1.667	1.672	1.6583	1.65	0.008	248.4	27.269	4	4.21	4.21	0.950119	0.950119	2013	MNLMBB	Mineral. Mag.	77	137
717	U4+(As3.87Si0.16S0.01)O8(OH)8 · 4H2O	vysokýite	1.617	1.535	1.654	1.602	1.605	-0.003	426.05	42.814	4	3.86	3.86	1.03627	1.03627	2013	MNLMBB	Mineral. Mag.	77	3035
718	MgSeO4 · 6H2O		1.4856	1.4892	1.4911	1.4886	1.476	0.013	231.69	18.894	6	6.32	6.31	0.949367	0.950872	1974	ACPHAA	Ann. Chim. Phys.	1	37
719	NiSeO4 · 6H2O		1.5391	1.5391	1.5122	1.5301	1.527	0.003	220.82	19.546	6	6.08	6.08	0.986842	0.986842	2002	JPCRBU	J. Phys. Chem. Ref. Data	31	931
720	ZnSeO4 · 6H2O		1.5288	1.5288	1.5036	1.5204	1.522	-0.002	222.92	19.368	6	5.97	5.96	1.00503	1.00671	2002	JPCRBU	J. Phys. Chem. Ref. Data	31	931
721	Mg(NH4)2(SeO4)2 · 6H2O		1.5070	1.5093	1.5169	1.5111	1.506	0.005	366.16	31.24	6	6.19	6.23	0.969305	0.963082	1905	JCSOA9	J. Chem. Soc.	87	1123
722	Co(NH4)2(SeO4)2 · 6H2O		1.5261	1.5327	1.5417	1.5335	1.526	0.008	364.66	32.483	6	6.31	6.35	0.950872	0.944882	1923	ZEKRDZ	Z. Kristallogr.	58	40
723	Ni(NH4)2(SeO4)2 · 6H2O		1.5285	1.5370	1.5460	1.5372	1.532	0.005	360.3	32.316	6	6.21	6.26	0.966184	0.958466	1923	ZEKRDZ	Z. Kristallogr.	58	40
724	Cu(NH4)2(SeO4)2 · 6H2O		1.5201	1.5344	1.5387	1.5311	1.537	-0.006	362.93	32.181	6	5.78	5.82	1.03806	1.03093	1923	ZEKRDZ	Z. Kristallogr.	58	40
725	Zn(NH4)2(SeO4)2 · 6H2O		1.5240	1.5306	1.5385	1.531	1.526	0.005	364.31	32.302	6	6.2	6.24	0.967742	0.961538	1905	JCSOA9	J. Chem. Soc.	87	1123
726	K2Mg(SeO4)2 · 6H2O		1.4967	1.4991	1.5138	1.5032	1.504	-0.001	348.42	29.266	6	5.96	6.03	1.00671	0.995025	2002	JPCRBU	J. Phys. Chem. Ref. Data	31	931
727	K2Ni(SeO4)2 · 6H2O		1.5181	1.5272	1.5427	1.5293	1.529	0	343.8	30.385	6	6.01	6.09	0.998336	0.985222	1923	ZEKRDZ	Z. Kristallogr.	58	40
728	K2Cu(SeO4)2 · 6H2O		1.5104	1.5228	1.5349	1.5227	1.531	-0.008	348.27	30.393	6	5.66	5.74	1.06007	1.0453	1923	ZEKRDZ	Z. Kristallogr.	58	40
729	Rb2Mg(SeO4)2 · 6H2O		1.5011	1.5030	1.5134	1.5058	1.505	0.001	363.55	30.697	6	6.05	6.25	0.991736	0.96	2002	JPCRBU	J. Phys. Chem. Ref. Data	31	931
730	Rb2Mn(SeO4)2 · 6H2O		1.5094	1.5140	1.5258	1.5164	1.518	-0.002	371.18	32.001	6	5.95	6.17	1.0084	0.972447	1931	REF-W1	REF-W1*	2	252
731	Rb2Co(SeO4)2 · 6H2O		1.5199	1.5256	1.5369	1.5275	1.524	0.004	362.25	31.903	6	6.15	6.35	0.97561	0.944882	1923	ZEKRDZ	Z. Kristallogr.	58	40
732	Rb2Ni(SeO4)2 · 6H2O		1.5198	1.5291	1.5390	1.5293	1.529	0	358.31	31.666	6	6	6.22	1	0.96463	1923	ZEKRDZ	Z. Kristallogr.	58	40
733	Rb2Cu(SeO4)2 · 6H2O		1.5153	1.5183	1.5318	1.5218	1.532	-0.01	362.32	31.565	6	5.59	5.79	1.07335	1.03627	1923	ZEKRDZ	Z. Kristallogr.	58	40
734	Rb2Zn(SeO4)2 · 6H2O		1.5162	1.5222	1.5331	1.5238	1.523	0.001	362.37	31.693	6	6.02	6.22	0.996678	0.96463	1905	JCSOA9	J. Chem. Soc.	87I	1123
735	Cs2Mg(SeO4)2 · 6H2O		1.5177	1.5178	1.5235	1.5197	1.523	-0.003	385.24	33.424	6	5.85	6.36	1.02564	0.943396	2002	JPCRBU	J. Phys. Chem. Ref. Data	31	931
736	Cs2Mn(SeO4)2 · 6H2O		1.5250	1.5279	1.5338	1.5289	1.535	-0.006	393.25	34.727	6	5.76	6.28	1.04167	0.955414	1922	PRLAAZ	Proc. R. Soc. London, Ser. A	101	225
737	Cs2Co(SeO4)2 · 6H2O		1.5354	1.5399	1.5453	1.5402	1.541	-0.001	384.33	34.666	6	5.97	6.48	1.00503	0.925926	1923	ZEKRDZ	Z. Kristallogr.	58	40
738	Cs2Ni(SeO4)2 · 6H2O		1.5395	1.5450	1.5489	1.5445	1.547	-0.002	379.77	34.526	6	5.89	6.41	1.01868	0.936037	1923	ZEKRDZ	Z. Kristallogr.	58	40
739	Cs2Zn(SeO4)2 · 6H2O		1.5326	1.5362	1.5412	1.5367	1.541	-0.004	384.09	34.418	6	5.82	6.33	1.03093	0.947867	1905	JCSOA9	J. Chem. Soc.	87I	1123
740	KAl(SeO4)2 · 12H2O		1.4806	1.4806	1.4806	1.4806	1.473	0.008	475.04	38.097	12	12.39	12.48	0.968523	0.961538	2002	JPCRBU	J. Phys. Chem. Ref. Data	31	931
741	KAl(SeO4)2 · 12H2O		1.4800	1.4800	1.4800	1.48	1.473	0.007	475.04	38.048	12	12.36	12.45	0.970874	0.963855	2002	JPCRBU	J. Phys. Chem. Ref. Data	31	931
742	(NH4)Al(SeO4)2 · 12H2O		1.486	1.486	1.486	1.486	1.475	0.011	481.65	39.064	12	12.56	12.57	0.955414	0.954654	1971	RFNBSM	RFNBSM*	9	6
743	CsAl(SeO4)2 · 12H2O		1.4865	1.4865	1.4865	1.4865	1.484	0.003	493.45	40.063	12	12.14	12.57	0.988468	0.954654	1933	ZEKRDZ	Z. Kristallogr.	85A	169
744	CsFe(SeO4)2 · 12H2O		1.5116	1.5116	1.5116	1.5116	1.506	0.006	501.88	42.641	12	12.18	12.05	0.985222	0.995851	1962	REFL8	REFL8*	II	180
745	KVO2SeO4 · 3H2O		1.575	1.619	1.657	1.617	1.62	-0.003	201.67	20.766	3	2.94	2.39	1.02041	1.25523	2011	RJICAQ	Russ. J. Inorg. Chem.	56	326
746	RbVO2SeO4 · 3H2O		1.582	1.625	1.653	1.62	1.612	0.008	209.8	21.708	3	3.19	2.65	0.940439	1.13208	2011	RJICAQ	Russ. J. Inorg. Chem.	56	326
747	Mn4.05Ca0.05Na0.03Nb5.71Fe0.12Si0.03O18.57 · 14H2O	peterandresenite	1.760	1.795	1.800	1.785	1.797	-0.012	714.3	93.047	14	13.04	13.07	1.07362	1.07116	2014	EJMIER	Eur. J. Mineral.	26	567
748	K6TeMo6O24 · 7H2O		1.66	1.70	1.76	1.7067	1.665	0.042	762.14	89.677	7	10.47	6.62	0.668577	1.0574	1934	PNASA6	Proc. Nat. Acad. Sci. USA	20	327
749	MgSb2(OH)12 · 6H2O	brandholzite	1.570	1.570	1.569	1.5697	1.57	0	370.07	35.2	6	6	5.99	1	1.00167	2000	AMMIAY	Am. Miner.	85	593
750	CoSb2(OH)12 · 6H2O		1.589	1.589	1.592	1.59	1.589	0.001	368.77	36.324	6	6.05	6.04	0.991736	0.993377	2000	AMMIAY	Am. Miner.	85	593
751	NiSb2(OH)12 · 6H2O	bottinoite	1.600	1.600	1.605	1.6017	1.595	0.007	364.54	36.613	6	6.27	6.27	0.956938	0.956938	1992	AMMIAY	Am. Miner.	77	1301
752	Na6Mo6TeO24 · 22H2O		1.577	1.662	1.683	1.6407	1.601	0.04	1043.19	111.492	22	26.51	23.58	0.829876	0.932994	1933	AMMIAY	Am. Miner.	18	225
753	Cu3TeO6 · 2H2O	jensenite	1.920	1.920	1.920	1.92	1.927	-0.007	157.14	23.785	2	1.88	1.87	1.06383	1.06952	1996	CAMIA6	Can. Mineral.	34	49
754	Na2(WO4) · 2H2O		1.5526	1.5553	1.5695	1.5591	1.559	0	155.71	14.537	2	1.99	1.9	1.00503	1.05263	1931	REF-W1	REF-W1*	2	220
755	Na0.57K0.22(H3O)0.21Al4.05As2.97O12 · 4H2O	natropharmacoalumite	1.556	1.556	1.556	1.556	1.52	0.036	461.53	42.848	4	5.88	5.77	0.680272	0.693241	2010	MNLMBB	Mineral. Mag.	74	929
756	Ba0.54Cu0.03K0.01Al3.99Fe0.02As3O12.15(OH)3.85 · 4H2O	bariopharmacoalumite	1.573	1.573	1.573	1.573	1.586	-0.013	464.2	44.412	4	6.31	6.16	0.633914	0.649351	2011	MNLMBB	Mineral. Mag.	75	135
757	Na1.68K0.52Fe4As3O12(OH)5.59 · 6.84H2O	pharmacosiderite	1.705	1.705	1.705	1.705	1.71	-0.005	513.92	60.331	6.84	6.54	6.24	1.04587	1.09615	1985	MRECA7	Mineral. Rec.	16	121
758	Ba0.5Fe4(OH)4As3O12 · 6.16H2O	bariopharmacosiderite-Q	1.728	1.728	1.718	1.7247	1.682	0.0427	508.3	61.319	6.16	8.53	8.43	0.722157	0.730724	2010	CAMIA6	Can. Mineral.	28	703
759	(H3O)0.5K0.48Na0.06(Fe3.79Al0.22)(As2.73P0.15)2.88O12(OH)4 · 4H2O	hydronium pharmacosiderite	1.691	1.691	1.691	1.691	1.633	0.058	504.11	58.032	4	7.22	7.16	0.554017	0.558659	2010	MNLMBB	Mineral. Mag.	74	863
760	Ca0.81Y0.13Al0.05La0.01Cu5.75Ca0.15As1.95P0.05O4AsO3OH(OH)6 · 3H2O	zalesiite	1.688	1.688	1.765	1.714	1.685	0.029	468.91	55.732	3	4.5	4.4	0.666667	0.681818	2000	AMMIAY	Am. Miner.	85	1564
761	Ce0.32Ca0.22La0.15Nd0.15Y0.08Sm0.03Gd0.03Eu0.02Dy0.01Cu5.62Fe0.05As2.8Si0.17S0.05O12.08(OH)6 · 3H2O	agardite-Ce	1.725	1.725	1.810	1.753	1.713	0.04	471.02	58.946	3	5.09	5.42	0.589391	0.553506	2004	CAMIA6	Can. Mineral.	42	1901
762	Nd0.19La0.14Y0.12Pr0.05Gd0.02Ce0.02Sm0.02Dy0.02Ca0.39Cu5.49Zn0.44As3O12(OH)6 · 3H2O	agardite-Nd	1.809	1.709	1.775	1.731	1.705	0.026	468.5	56.971	3	4.36	4.61	0.688073	0.650759	2011	JGEOSC	J. Geosci.	56	249
763	Y0.41Ce0.28Nd0.23Sm0.13La0.11Fe0.20Ca0.79Cu12.07(PO4)6(OH)12 · 6H2O	petersite-Y	1.666	1.666	1.747	1.693	1.672	0.021	449.3	51.869	3	4.05	4.08	0.740741	0.735294	1982	AMMIAY	Am. Miner.	67	1039
764	Ca0.58Y0.13Ce0.11Nd0.08La0.04K0.02Dy0.02Pr0.01Yb0.01Cu5.9Ca0.14(PO4)2.06PO3OH0.65(AsO4)0.22(SiO4)0.22(OH)6 · 3H2O	calciopetersite	1.674	1.674	1.750	1.699	1.678	0.021	451	52.505	3	4.07	3.98	0.737101	0.753769	2005	CAMIA6	Can. Mineral.	43	1393
765	Ba(OH)2 · 8H2O		1.5017	1.5017	1.471	1.491	1.47	0.021	250.61	20.537	8	8.56	8.65	0.934579	0.924855	1962	LB II	LB II		95
766	Sr(OH)2 · 8H2O		1.4991	1.4991	1.4758	1.491	1.468	0.023	235.84	19.326	8	8.56	8.65	0.934579	0.924855	1962	LB II	LB II		92
767	Na2.93Mg0.99Ca0.04P3O10 · 12H2O	hylbrownite	1.390	1.421	1.446	1.419	1.448	-0.029	511.87	35.728	12	10.35	10.54	1.15942	1.13852	2013	MNLMBB	Mineral. Mag.	77	385
768	Zn(Fe3+)2As2O8(OH)2 · 4H2O	ojuelaite	1.696	1.730	1.798	1.741	1.772	-0.031	274.27	33.794	4	3.06	3.05	1.30719	1.31148	1981	BUFCAE	Bull. Soc. Fr. Miner. Crist.	104	582
769	Zn2.8Fe0.06Mn0.04Mg0.03As2O8 · 4H2O	arsenohopeite	1.598	1.606	1.613	1.60567	1.636	-0.0303333	262.37	26.539	4	3.14	3.15	1.27389	1.26984	2012	MNLMBB	Mineral. Mag.	76	603
770	SrCl2 · 2H2O	synthetic	1.5942	1.5948	1.6172	1.60207	1.617	-0.0149333	120.1	12.069	2	1.79	1.67	1.11732	1.1976	1931	WINCHL		2	170
	szymanskiite, a complex mercury hydronium carbonate hydroxide hydrate was not considered in this analysis
	1 Sequence number of entries, deviating from sequence number of lines in first column
	2 Alt = tetrahedral Al
	3 Mean value <nD> = 1/3(nx+ny+nz)
	4 Mean refractive indices calculated from electronic polarizabilities using eq (2) and eq (1) solved for n
	4 Dn = <nD>obs - <nD>calc
	* References for Table S1 not listed with full information in cols. O to S
	LB II
	REF-A
	Anthony, J.W., Bideaux, R.A., Bladh, K.W., and Nichols, M.C. Eds., Handbook of Mineralogy,
	Mineralogical Society of America, Chantilly, VA 20151-1110, USA.
	http://www.handbookofmineralogy.org/.
	REF-G
	Gaines, R.V., Skinner, H.C., Foord, E.E., Mason, B., and Rosensweig, A. (1997) The System of
	Mineralogy of James Dwight Dana and Edward Salisbury Dana. John Wiley and Sons, New
	York. 1119 pp.
	REFL8
	Hellwege, K.H., and Hellwege, A.M. Eds., (1962) Landolt-Börnstein, Band II.Teil 8.Optische
	Konstanten, Springer-Verlag, Berlin (in German).
	REF-P2
	Palache, C., Berman, H., and Frondel, C. (1951) Dana’s system of mineralogy, (7th edition), v.
	II, 1124 pp.
	REF-S
	Seaborg, G.T. and Katz, J.J. (1954) The Actinide Elements McGraw-Hill Book Co, Inc.New
	York
	REF-W1
	Winchell, A.N. (1931) The Microscopic Characters of Artificial Inorganic Solid Substances or
	Artificial Minerals. 2nd ed.J.Wiley, New York. 403 pp.
	REF-W2
	Winchell, A.N. and Winchell, H. (1964) The Microscopical Characters of Artificial Inorganic
	Solid Substances. Optical Properties of Artificial Minerals. Academic Press, New York. 439 pp.
	RFNBSM National Bureau of Standards Monograph Series.
